# Supplementary material for: Spatial variation of heart failure and air pollution in Warwickshire, UK: an investigation of small scale variation at the ward-level
Source: PubMed Central journal article supplement (PMC4256640; doi:10.1136/bmjopen-2014-006028), 2014-12-02
Supplement: bmjopen-2014-006028.draft_revisions.pdf [file bmjopen-2014-006028.draft_revisions.pdf]

# BMJ Open

## Spatial variation of Heart Failure and Air Pollution in Warwickshire: An investigation of small scale variation at the ward-level

|                                 |                                                                                                                                                                                                                                                                                                                                                                                                  |
|---------------------------------|--------------------------------------------------------------------------------------------------------------------------------------------------------------------------------------------------------------------------------------------------------------------------------------------------------------------------------------------------------------------------------------------------|
| Journal:                        | <i>BMJ Open</i>                                                                                                                                                                                                                                                                                                                                                                                  |
| Manuscript ID:                  | bmjopen-2014-006028                                                                                                                                                                                                                                                                                                                                                                              |
| Article Type:                   | Research                                                                                                                                                                                                                                                                                                                                                                                         |
| Date Submitted by the Author:   | 02-Jul-2014                                                                                                                                                                                                                                                                                                                                                                                      |
| Complete List of Authors:       | Bennett, Oscar; Warwickshire County Council, Public Health Warwickshire,Communities Group<br>Kandala, Ngianga-Bakwin; University of Warwick, Warwick Medical School<br>Ji, Chen; University of Warwick, Warwick Medical School<br>Linnane, John; Warwickshire County Council, Public Health Warwickshire,Communities Group<br>Clarke, Aileen; University of Warwick, Division of Health Sciences |
| <b>Primary Subject Heading</b>: | Epidemiology                                                                                                                                                                                                                                                                                                                                                                                     |
| Secondary Subject Heading:      | Cardiovascular medicine, Epidemiology, Public health                                                                                                                                                                                                                                                                                                                                             |
| Keywords:                       | Heart failure < CARDIOLOGY, EPIDEMIOLOGY, SOCIAL MEDICINE                                                                                                                                                                                                                                                                                                                                        |
|                                 |                                                                                                                                                                                                                                                                                                                                                                                                  |

SCHOLARONE™  
Manuscripts

1  
2  
3  
4  
5  
6  
7  
8  
9  
10  
11  
12  
13  
14  
15  
16  
17  
18  
19  
20  
21  
22  
23  
24  
25  
26  
27  
28  
29  
30  
31  
32  
33  
34  
35  
36  
37  
38  
39  
40  
41  
42  
43  
44  
45  
46  
47  
48  
49  
50  
51  
52  
53  
54  
55  
56  
57  
58  
59  
60

Word count, abstract: 310

Word count, text: 3,562

References: 14

Tables: 1

Figures: 6

## Spatial variation of Heart Failure and Air Pollution in Warwickshire: An investigation of small scale variation at the ward-level

*Oscar Bennett MB BChir, Ngianga-Bakwin Kandala PhD<sup>1</sup>, Chen Ji PhD<sup>1</sup>, John Linnane MD<sup>2</sup>, Aileen Clarke MD PhD<sup>1</sup>.*

<sup>1</sup> Division of Health Sciences, University of Warwick Medical School, Coventry, CV4 7AL, UK.

<sup>2</sup> Public Health Warwickshire, Communities Group, Warwickshire County Council, Shire Hall, Barrack Street, Warwick, CV34 4RL, UK.

**Running title:** Heart Failure and Air Pollution in Warwickshire

**Keywords:** Warwickshire, Heart Failure, Air Pollution, epidemiology, spatial analyses

### Correspondence to:

Ngianga-Bakwin Kandala, PhD  
Division of Health Sciences  
University of Warwick Medical School  
Medical School Building  
Gibbet Hill Campus  
Coventry CV4 7AL  
United Kingdom  
Tel: + 44 (0) 2476150541  
Fax: + 44 (0) 2476528375  
Email: N-B.Kandala@[warwick.ac.uk](http://warwick.ac.uk)

## Abstract

**Objectives:** To spatially map the morbidity and mortality caused by heart failure within Warwickshire to characterise and quantify any influence of air pollution on these risks.

**Design:** Cross-sectional.

**Setting:** Warwickshire

**Participants:** Data from all of the 105 current Warwickshire County wards were collected on admission and death in hospital of heart failure.

**Interventions:** N/A

**Primary and secondary outcome measures:** Air pollution, heart failure hospital admissions and mortality data within Warwickshire were.

### Results

In multivariate analyses, the presence of a higher NO<sub>x</sub> in a ward [3.35:1.89, 4.99], Ben [31.9:8.36, 55.85] and IMD [0.02: 0.01, 0.03], were consistently associated with a higher risk of heart failure morbidity. Pm [-12.93:-20.41, -6.54] was negatively associated with the risk of heart failure morbidity but with no association with So<sub>2</sub>.

The risk of heart failure mortality was higher in wards with a higher NO<sub>x</sub> [4.30:1.68, 7.37] and wards with more inhabitants 50+ years old [1.60: 0.47, 2.92]. Pm was negatively associated [-14.69: -23.46, -6.50] with heart failure mortality. So<sub>2</sub>, Ben, and IMD score were not associated with heart failure mortality.

There was a striking variation in heart failure morbidity and mortality risk across wards, the highest risk being in the regions around Nuneaton and Bedworth.

### Conclusion

This study showed distinct spatial patterns in heart failure morbidity and mortality, suggesting the potential role of environmental factors beyond individual-level risk factors. Air pollution levels should therefore be taken into account when considering the wider determinants of public health and the impact that changes in air pollution might have on the health of a population.

## ARTICLE FOCUS

- Air pollution has been linked to the development and exacerbation of a number of health problems including cardiovascular diseases such as heart failure.
- Heart failure is a serious condition that unfortunately affects many people in the UK. This link seems especially clear for cardiovascular and respiratory diseases such as ischaemic heart disease, heart failure, asthma, influenza, and lung cancer
- It is well established that the ambient levels of air pollution in a region can have an impact on the health status of the population which inhabits it

## KEY MESSAGES

1. Using a novel approach, this study has characterised and quantified the potential role of environmental factors (air pollutants) at the county-level.
2. The presence of a higher Mono-nitrogen Oxide (NO<sub>x</sub>) in a ward, benzene and poor Index of Multiple Deprivation (IMD) score were consistently associated with a higher risk of heart failure morbidity. Particulate matter (Pm) was negatively associated with the risk of heart failure morbidity.
3. The risk of heart failure mortality was higher in wards with a higher NO<sub>x</sub> and wards with more inhabitants 50+ years old. Pm was negatively associated with heart failure mortality.
4. There was a striking variation in heart failure morbidity and mortality risk across wards, the highest risk being in the regions around Nuneaton and Bedworth.

## STRENGTHS AND LIMITATIONS

- This study showed distinct spatial patterns in heart failure morbidity and mortality in Warwickshire, suggesting the potential role of environmental factors beyond individual-level risk factors.
- Air pollution levels should therefore be taken into account when considering the wider determinants of public health and the impact that changes in air pollution might have on the health of a population

## Introduction

Air pollution has been linked to the development and exacerbation of a number of health problems. This link seems especially clear for cardiovascular and respiratory diseases such as ischaemic heart disease, heart failure, asthma, influenza, and lung cancer<sup>(1, 2, 3, 4)</sup>. It is well established that the ambient levels of air pollution in a region can have an impact on the health status of the population which inhabits it<sup>(5)</sup>. Air pollution levels should therefore be taken into account when considering the wider determinants of public health and the impact that changes in air pollution might have on the health of a population.

The issue of air pollution has been highlighted in Warwickshire recently by the setting up of Air Quality Management Areas (AQMAs) in a number of different parts of the county. These are specific areas in the county that have been identified as places where, without a focused local council strategy to reduce air pollution, future government targets for air pollutant concentrations may not be met. Within Warwickshire the specific air pollutant that has been identified as a problem and led to these special areas being setup is mono-nitrogen oxides (NO<sub>x</sub>)<sup>(6)</sup>.

The objective of the present study was therefore to look for any relationship between levels of air pollution and the morbidity and mortality associated with heart failure within Warwickshire in the last few years (2005-2013 for morbidity, 2007-2012 for mortality). We examined a range of traditional air pollutants for an ecological association with heart failure morbidity and mortality at the county level. Furthermore, the present analysis attempted to highlight spatial patterns in heart failure morbidity and mortality risk within the county, after multiple adjustments for proximate, county-level factors. The geographic locations of wards within the county can be considered as proxy measures of many other unmeasured factors such as availability and access to health services, individual health seeking behaviour, preventive ward policy and general ward factors. Such estimates might illustrate how much

1 can be learned by detailed exploratory analyses as well as how these data can be used to  
2  
3 strategically inform policy aiming at the prevention and management of serious conditions  
4  
5 such as heart failure in these settings.  
6  
7  
8  
9

### 10 **The evidence from published literature for the link between air pollution and health** 11 **problems**

12  
13  
14 Studies have shown an effect on the health of populations caused by both long term exposure  
15  
16 as well as short term “spikes” in local air pollution levels<sup>(5)</sup>.  
17  
18

19 A relevant systematic review and meta-analysis has been published recently in the Lancet<sup>(2)</sup>.  
20  
21 It pooled the results of studies that have been conducted worldwide looking at the temporal  
22  
23 relationship between the levels of a number of different air pollutants with local heart failure  
24  
25 hospital admission rates and mortality rates. This showed a clear link between short term rises  
26  
27 in all types of air pollution (except ozone) and rises in hospital admissions and mortality due  
28  
29 to heart failure. This study did not look at any potential effects from long term exposure to air  
30  
31 pollution. However it did provide strong evidence that air pollution can ‘exacerbate’ heart  
32  
33 failure, increasing the likelihood that a patient with existing heart failure will become  
34  
35 sufficiently unwell to require hospital admission, or even die.  
36  
37  
38

39 The ESCAPE study<sup>(3)</sup>, published recently in the Lancet Oncology, pooling the results of 17  
40  
41 cohort studies from around Europe looked at the ambient levels of air pollution in an area  
42  
43 (particulate matter and NOx) and the incidence of lung cancers in the inhabitants of this area  
44  
45 during many years of follow up (mean 12.8 years). This was intended to look at the risk  
46  
47 associated with long term exposure to air pollution. A statistically significant correlation was  
48  
49 found between the levels of particulate matter air pollution and the local incidence of lung  
50  
51 cancer diagnoses. Particulate matter with a diameter of less than 10 µm had a hazard ratio of  
52  
53 1.22 [95% CI 1.03-1.45] per (10 µg/cubic meter). In other words, for every increase in  
54  
55 particulate matter pollution of 10 µg/cubic meter there was a corresponding immediate  
56  
57  
58  
59  
60

1 increase in the chance of being diagnosed with lung cancer of 22% (95% CI 3% - 45%).

2  
3 There was also a correlation between traffic volume within 100m of a residence and a modest  
4  
5 increase in the rate of lung cancer (Hazard ratio 1.09 (CI 0.99-1.21)). No similar correlation  
6  
7 was found with NO<sub>x</sub> air pollution. This suggests that long term exposure to higher levels of  
8  
9 particulate matter air pollution may increase the incidence of lung cancer in a population.

10  
11 Another study published in the United States in 2004 looked at the long term effect of  
12  
13 exposure to particulate matter air pollution and the mortality attributed to different  
14  
15 cardiovascular and respiratory diseases in different areas of the United States<sup>(4)</sup>. A good  
16  
17 correlation was found between the degree of long term exposure to particulate matter air  
18  
19 pollution and increases in mortality from cardiovascular diseases, including heart failure.  
20  
21 Interestingly this was not found to be the case for most respiratory diseases. There was also an  
22  
23 element of the study that looked at the effect of a person's smoking status on the mortality  
24  
25 statistics. This found, as expected, a strong link between mortality and smoking. However it  
26  
27 also found that air pollution contributed an additional rise in cardiovascular mortality on top  
28  
29 of that attributed to smoking which was at least additive if not synergistic as a risk factor.  
30  
31  
32  
33  
34  
35  
36

## 37 **Methods**

### 38 *Study data*

39  
40 In order to carry out this project data was collected about the geographical distribution of air  
41  
42 pollution within Warwickshire. This data included information about each of four individual  
43  
44 components of air pollution (NO<sub>x</sub>, sulphur dioxide, particulate matter, and benzene) which  
45  
46 could then be united into a combined index (all of the contributions added together). A single  
47  
48 recorded level from 2010 of each air pollutant for each ward was used in the study. This was  
49  
50 then compared to collected data about:  
51  
52  
53

- 54  
55 (i) The geographical distribution of home addresses of patients who were admitted to  
56  
57 hospital because of heart failure or a complication of heart failure. Hospital  
58  
59  
60

1 admission rate in an area due to heart failure was used as a proxy indicator for the  
2 level of heart failure morbidity within that area.  
3  
4

- 5 (ii) The geographical distribution of home addresses of patients who died from heart  
6 failure, or whose death was contributed to by heart failure.  
7  
8  
9

10 These data were collected by the Warwickshire Observatory, which is part of the  
11 Warwickshire County Council in charge of collecting and handling statistics relating to the  
12 county. Ward level population data were obtained from the 2011 census. Data from all of the  
13 105 current Warwickshire County wards were collected.  
14  
15

16 The potential confounding variables of firstly age structure of a population within a ward and  
17 secondly levels of social deprivation within a ward were identified<sup>(7,8)</sup>. These were then  
18 controlled for in the second stage of the statistical analysis (see below).  
19  
20

21 Information about the age structure of wards was obtained from the Office of National  
22 Statistics mid 2010 estimates (obtained from the Warwickshire Observatory website)<sup>(9)</sup>. The  
23 representative statistical value of “percentage (%) of population above age 50” was used as an  
24 indicator of wards with a higher proportion of older people.  
25  
26

27 Information about social deprivation was obtained from the English Indices of Deprivation  
28 published by the Department for Communities and Local Government<sup>(10)</sup>. The Index of  
29 Multiple Deprivation (IMD) averaged across each ward was used as an indicator of the level  
30 of deprivation within the wards of Warwickshire.  
31  
32

33 The information on crude observed air pollution level distribution, heart failure hospital  
34 admission rates and mortality rates were then represented on maps of Warwickshire (**Figure**  
35 **1**).  
36  
37  
38  
39  
40  
41  
42  
43  
44  
45  
46  
47  
48  
49  
50

### 51 *Statistical Analysis*

52

53 To account for spatial autocorrelation in observed heart failure hospital admission and  
54 mortality rates at the ward level, in Warwickshire, we applied a unified approach to account  
55  
56  
57  
58  
59  
60



1 for possible air pollution effects of environmental risk factors. This was achieved using a geo-  
2 additive semi-parametric mixed model. The model employed a fully Bayesian approach using  
3 Markov Chain Monte Carlo (MCMC) techniques for inference and model checking<sup>(11, 12)</sup>.  
4 Response variables were defined as the count (per 1000 population) of heart failure morbidity  
5 or mortality in a ward (Poisson model):  $y_i / \eta_i, \delta \sim B(\eta_i, \delta)$  for a binomial formulation. The  
6 standard measure of effect was the posterior mean (PM) and 95% credible region (CR).  
7  
8  
9  
10  
11  
12  
13

14 The analysis was carried out using version 2.0.1 of the BayesX software package, which  
15 permits Bayesian inference based on MCMC simulation techniques<sup>(13)</sup>. Multivariate Bayesian  
16 geo-additive regression models were used to evaluate the significance of the posterior mean  
17 (PM) determined for the fixed effects and spatial effects between air pollution and the  
18 morbidity and mortality from heart failure within Warwickshire. Each component of air  
19 pollution was looked at separately and then also the combined index in unadjusted models.  
20 Next, fully adjusted multivariate Bayesian geo-additive regressions analysis were performed  
21 to look again for statistically significant correlation between these variables, but this time  
22 further controlling for any influence from age structure or social deprivation.  
23  
24  
25  
26  
27  
28  
29  
30  
31  
32  
33  
34  
35  
36

## 37 Results

38 The following maps display the observed data collected for this study using graduated  
39 colouring to represent data value categories within each ward.  
40  
41  
42  
43  
44  
45

### 46 *Observed Air Quality Map*

47 This map (**Figure 1left**) was produced using 2010 data from the Warwickshire Observatory.  
48 It is based on a combined air quality indicator which is a combination of information about  
49 the contribution to air pollution from NO<sub>x</sub>, sulphur dioxide, particulate matter, and benzene.  
50 The Warwickshire Observatory description of this index reads as follows:  
51  
52  
53  
54  
55  
56  
57  
58  
59  
60

1 “Combined Air Quality Indicator (estimates of emissions for four pollutants: benzene,  
2 nitrogen dioxide, sulphur dioxide and particulates) for small areas (modelled to 1 km grid  
3 squares) where an index value of 1 is equivalent to the national standard for each pollutant.  
4  
5 The values are then summed so an overall score of 4 would represent all four pollutants being  
6  
7 present at the national standard level.”<sup>(14)</sup> These specific standards are described in the Air  
8  
9 Quality Standards Regulations 2010.  
10  
11  
12  
13

14 The geographical pattern of the observed air pollution across the county shows a higher level  
15  
16 of air pollution near the more urban centres of Birmingham and Coventry. The proximity of  
17  
18 parts of the county to motorways such as the M6 and M42 could also be a contributing factor  
19  
20 to the observed pattern. There was no place in the county where the level of any pollutant  
21  
22 exceeded the national standard in 2010.  
23  
24

#### 25 26 27 *Heart Failure Hospital Admission Map*

28  
29 This map (**Figure 1centre**) shows the geographical distribution of the home addresses of  
30  
31 patients admitted to hospital with a diagnosis of heart failure (or exacerbation of heart failure)  
32  
33 within the April 2005- April 2013 period.  
34  
35

#### 36 37 38 *Heart Failure Mortality Map*

39  
40 This map (**Figure 1right**) shows the geographical distribution of the home addresses of  
41  
42 patients who died either directly or in part from heart failure in the 2007-2012 (inclusive)  
43  
44 periods.  
45  
46

47  
48  
49  
50 **Table 1** (left panel) displays posterior means of heart failure admission across the selected  
51  
52 covariates following multivariate Bayesian geo-additive regression analyses.  
53

54 The Posterior mean (PM) & 95% Credible Region (CR) of overall hospital admission rates  
55  
56 due to heart failure and mortality rates from heart failure were [6.19 (3.84, 8.97)] and [4.13  
57  
58  
59  
60

(1.18, 7.43)] (Table 2) respectively. On average, the presence of a higher Mono-nitrogen oxide indicator (NO<sub>x</sub>) in a ward [Posterior mean (PM) & 95% Credible Region (CR): 3.35 (1.89, 4.99)], Benzene indicator (Ben) [31.9 (8.36, 55.85)] and IMD 2010 score [0.02 (0.01, 0.03)], were consistently associated with higher risk of heart failure morbidity. The particulates indicator (Pm) [-12.93 (-20.41, -6.54)] was negatively associated with the risk of heart failure morbidity and Sulphur dioxide indicator (So<sub>2</sub>) was not associated with heart failure admission.

**Table 1(right panel)** shows the same corresponding results for heart failure mortality. This table shows that the risk of heart failure mortality was higher in wards with a higher Mono-nitrogen oxide indicator (NO<sub>x</sub>) [4.30 (1.68, 7.37)] and wards with more inhabitants over 50 years old [1.60 (0.47, 2.92)]. The particulates indicator (Pm) was negatively associated with heart failure mortality. The sulphur dioxide indicator (So<sub>2</sub>), Benzene indicator (Ben), and IMD score were not associated with heart failure mortality.

The combined air pollution index (all indicators averaged together) when incorporated into a separate model combining age and social deprivation was significantly positively associated with both heart failure morbidity [1.39 (0.87, 1.81)] and mortality [1.79 (0.85, 2.55)] across the county.

In **Figures 2 and 4**, the left-hand maps show the unadjusted estimates air pollution posterior total residual ward means of heart failure morbidity and mortality. **Figures 3 and 5** show the adjusted PM after multiple adjustment for the geographical location, taking into account the auto-correlation structure in the data, the uncertainty in the ward level and all ward-level risk factors for heart failure morbidity and mortality. The red colour indicates the maximum posterior mean recorded while green denotes a lower mean. The right-hand maps show the 95% posterior probability of heart failure and mortality, which indicate the statistical significance associated with the total excess risk. Black colour indicates a negative spatial

1 effect (associated with increased risk of heart failure and mortality), white colour a positive  
2 effect (an decreased risk) and grey colour a non-significant effect.  
3  
4

5  
6 In general, there was consistently higher heart failure morbidity risk in northern wards  
7 particularly around Nuneaton and Bedworth and lower heart failure morbidity risks in the  
8 southern wards particularly within the district of Stratford-on-Avon. However, all this  
9 variation could not be accounted for within the model generated within this study (taking into  
10 account air pollution, age, and social deprivation levels). On the other hand, for heart failure  
11 mortality risks, in general, heart failure mortality risk was higher in northern wards around  
12 Nuneaton and Bedworth as well as in some central areas around Warwick, Royal Leamington  
13 Spa, and Kenilworth. Heart failure mortality risk was again lower in more southern wards  
14 particularly within Stratford-on-Avon. Unlike with morbidity however, our model could not  
15 explain all this variation in heart failure mortality. Even after taking into account air pollution,  
16 age, and social deprivation the rate of death from heart failure remained significantly higher  
17 than would be expected in areas within and around Nuneaton, Bedworth, Warwick, Royal  
18 Leamington Spa, and Kenilworth.  
19  
20  
21  
22  
23  
24  
25  
26  
27  
28  
29  
30  
31  
32  
33  
34

35  
36 In sensitivity analyses, we tested several models and our results were not substantially altered  
37 after removing one or two pollutant (data not shown).  
38  
39  
40  
41  
42

### 43 **Discussion**

44 Before even considering air pollution, this study helps to demonstrate the inequality in risk  
45 from heart failure disease and death that exists for individuals living in different parts of the  
46 county of Warwickshire. There is a significant excess risk of both disease and death in more  
47 northern wards within and surrounding Nuneaton and Bedworth. Much (but not all) of this  
48 risk could be attributed to the air pollution and social deprivation that exists in these areas  
49 according to our model. Measures that seek to address air pollution and social deprivation  
50  
51  
52  
53  
54  
55  
56  
57  
58  
59  
60

1 could be expected therefore to help mitigate against cardiovascular risks within these local  
2  
3 populations.  
4

5 The present study corroborates the notion that air pollution is an increasingly important public  
6  
7 health issue in Warwickshire. Higher levels of the average air pollution index looked at in this  
8  
9 study correlated significantly with increased levels of both heart failure morbidity and  
10  
11 mortality, even after removing the effects of age structure and social deprivation. The  
12  
13 individual component of NOx air pollution seems particularly to contribute risk to both the  
14  
15 morbidity and mortality of heart failure within the county, suggesting that it may have a  
16  
17 particularly detrimental effect on heart failure patients. This reinforces the importance of the  
18  
19 AQMAs set up within the county in response to high NOx levels. Road traffic is a large  
20  
21 contributor to air pollution within Warwickshire. Diesel engines are responsible for a large  
22  
23 part of the NOx component of these emissions.  
24  
25  
26

27 An unexpected result also appeared within our analysis. Particulate matter was positively non-  
28  
29 significantly correlated with heart failure morbidity and mortality on its own. However it  
30  
31 became negatively significantly correlated when incorporated into the whole model with all  
32  
33 the other factors taken into account and controlled for in this study. This would imply some  
34  
35 sort of unexpected “protective influence” from particulate matter air pollution on heart failure  
36  
37 patients. This clearly contradicts our expectations and is at odds with a wealth of existing  
38  
39 evidence that indicates that particulate matter air pollution contributes risk to and exacerbates  
40  
41 cardiovascular disease<sup>(4)</sup>.  
42  
43  
44  
45  
46  
47

48 A possible explanation for this is based on the following four observations:

- 49 1. The above-mentioned negative correlation of particulate matter air pollution with heart  
50 failure morbidity and mortality in our model.  
51
- 52 2. Particulate matter air pollution actually varied very little across the county compared  
53 to the other types of air pollution. All types of air pollution tended to decrease in rural  
54  
55  
56  
57  
58  
59  
60

1 areas, but particulate matter tended to decrease much *less* compared to the other  
2 components of air pollution. Consequently in rural areas of the county where most  
3 types of air pollution are significantly lower, particulate matter pollution was  
4 relatively higher compared to NO<sub>x</sub>, Benzene, and SO<sub>2</sub>.  
5  
6  
7  
8  
9

- 10 3. There seems to be high risk of heart failure deaths in urban centres (particularly  
11 Nuneaton, Bedworth, Warwick, Royal Leamington Spa, and Kenilworth), higher than  
12 can be explained by our model.  
13  
14
- 15 4. Conversely, there seems to be a particularly low risk of heart failure deaths in some  
16 rural areas within the western part of Stratford-on-Avon, lower than can be explained  
17 by our model.  
18  
19  
20  
21  
22

23 Our hypothesis is that there is an additional factor influencing the morbidity and mortality of  
24 heart failure not looked at in this study, namely the urban/rural nature of a patient's living  
25 environment. It could be the case that living in an urban environment contributed risk and  
26 living in a rural area provided protection against heart failure morbidity and mortality. This  
27 would be an effect in *addition* to any increase in air pollution or social deprivation within  
28 urban settings compared to rural settings. This could certainly in principle be plausible, with  
29 people in rural areas perhaps doing more physical activity, eating more healthily etc. If this  
30 were the case it would explain the excess deaths in urban centres found in this study. It could  
31 also be responsible for the unexpected protective factor attributed to particulate matter air  
32 pollution in our analysis. Given that the particulate matter component of air pollution is  
33 *relatively* higher than the other components in rural areas the protection that living in rural  
34 areas affords individuals could be misleadingly attributed to the particulate matter component  
35 of air pollution present in these areas. Further work will need to be done looking into this  
36 possible link between urban/rural living environments and heart failure morbidity and  
37 mortality. It could be very revealing to carefully characterise this effect if it indeed exists, as it  
38  
39  
40  
41  
42  
43  
44  
45  
46  
47  
48  
49  
50  
51  
52  
53  
54  
55  
56  
57  
58  
59  
60

1 may be an indication of unrecognised cardiovascular risk/protective factors associated with  
2 urban/rural living that exists within Warwickshire.  
3  
4  
5

6  
7  
8 There are some limitations in this study worth considering that result from assumptions made  
9 along the way. A single air pollution measurement in 2010 was used and it was assumed that  
10 there was no significant change in this value over the 2005-2013 period that mortality and  
11 hospital admission data was gathered from. The resulting cross-sectional nature of the study  
12 does not allow establishing temporality and thus causality of the observed associations. There  
13 was also no way to determine the length of time that individual members of the population  
14 within a ward had lived in that area, and thus how long they had been exposed to the  
15 measured ambient air pollution level. It was assumed that people with home addresses in a  
16 ward were exposed significantly to the levels of air pollution in that ward. It is worth noting  
17 that the correlation between NO<sub>x</sub> pollution and cardiovascular risk picked up in this piece of  
18 work is in line with the conclusions drawn by a significant number of other well powered  
19 studies using large amounts of data from all around the world<sup>(2)</sup>.  
20  
21  
22  
23  
24  
25  
26  
27  
28  
29  
30  
31  
32  
33  
34  
35  
36

37 In summary, this study has provided a number of interesting results. Firstly it has helped to  
38 quantify the inequality that exists across different parts of Warwickshire with regards to heart  
39 failure risk. It has also provided some interesting circumstantial evidence of a link between  
40 heart failure morbidity and air pollution (particularly NO<sub>x</sub>). Finally it has also given a  
41 suggestion of a possible link between living in urban environments and a higher risk of  
42 cardiovascular disease, and a corresponding lower risk from living in rural environments.  
43  
44  
45  
46  
47  
48  
49

50 More work will need to be done to look into this possibility. It would be informative to run  
51 this analysis whilst factoring in the influence of a person's distance from their nearest urban  
52 centre. This urban/rural factor should be further explored and mined for additional  
53 information as it could be an indication of hitherto unconsidered factors influencing the health  
54  
55  
56  
57  
58  
59  
60

1 status of the population of Warwickshire and possibly further afield. It would also be  
2  
3 interesting to look at the effects of air pollution variation in the shorter term. For example,  
4  
5 looking at how local “spikes” in air pollution affect the rates of hospital admissions locally  
6  
7 immediately following it. This could be done in Leamington Spa where there is an air quality  
8  
9 monitoring station constantly measuring the levels of air pollutants.  
10  
11

12 Other health problems, such as ischaemic heart disease and respiratory diseases, have been  
13  
14 linked with air pollution as well and it could be informative to also look into these links  
15  
16 locally.  
17  
18

19 The Warwickshire maps displaying the distribution of air pollution, heart failure hospital  
20  
21 admissions, and heart failure mortality (Figure 1, 2, 3, 4 respectively) provide a convenient  
22  
23 way to see the specific areas where these problems are relatively more or less severe.  
24  
25  
26  
27

#### 28 **Contributorship statement:**

29  
30 O B Conceived the idea analyzed the data, contributed to formulating the results and wrote  
31  
32 the first draft. N-B K analyzed the data, advised on statistical aspects, contributed to  
33  
34 formulating the results wrote the second draft. CJ analyzed the data. J L helped coordinate  
35  
36 the project and co-wrote the final draft; AC coordinated the project, advised on all aspects and  
37  
38 co-wrote the final draft.  
39  
40

#### 41 **Funding:**

42  
43 *This paper presents independent research supported by the National Institute for Health*  
44  
45 *Research (NIHR) Collaborations for Leadership in Applied Health Research and Care West*  
46  
47 *Midlands. The views expressed are those of the author(s) and not necessarily those of the*  
48  
49 *NHS, the NIHR or the Department of Health.*  
50  
51

52 **Competing interests:** The authors declared no conflict of interest.  
53  
54

55 **Data sharing:** Not application  
56  
57  
58  
59  
60



## References

1. Particulate Air Pollution and Hospital Emergency Room Visits for Asthma in Seattle, Joel Schwartz, Daniel Slater, Timothy V. Larson, William E. Pierson, and Jane Q. Koenig. *American Review of Respiratory Disease*, Vol. 147, No. 4 (1993), pp. 826-831.
2. Global association of air pollution and heart failure: a systematic review and meta-analysis, Anoop SV Shah, Jeremy P Langrish, Harish Nair, David A McAllister, Amanda L Hunter, Prof Ken Donaldson, Prof David E Newby, Dr Nicholas L Mills. *The Lancet*, Early Online Publication, 10 July 2013  
DOI: 10.1016/S0140-6736(13)60898-3
3. Air pollution and lung cancer incidence in 17 European cohorts: prospective analyses from the European Study of Cohorts for Air Pollution Effects (ESCAPE), Raaschou-Nielsen O, Andersen ZJ, et al. *Lancet Oncol*. 2013 Aug;14(9):813-22
4. Cardiovascular Mortality and Long-Term Exposure to Particulate Air Pollution, Epidemiological Evidence of General Pathophysiological Pathways of Disease C. Arden Pope III, Richard T. Burnett, et al. *Circulation*. 2004; 109: 71-77
5. Air pollution and health, Bert Brunekreef, Stephen T Holgate, *The Lancet*, Volume 360, Issue 9341, 19 October 2002, Pages 1233–1242
6. Department of Environment, Food and Rural Affairs (DEFRA), department website, weblink (accessed 2/12/13):  
[http://aqma.defra.gov.uk/aqma/local\\_authorities.php?la\\_id=296](http://aqma.defra.gov.uk/aqma/local_authorities.php?la_id=296)
7. Epidemiology, pathophysiology, and etiology of congestive heart failure in older adults. Rich MW. *J Am Geriatr Soc*. 1997 Aug;45(8):968-74.
8. Influence of socioeconomic deprivation on the primary care burden and treatment of patients with a diagnosis of heart failure in general practice in Scotland: population based study. F A McAlister, N F Murphy, et al. *BMJ*. 2004 May 8; 328(7448): 1110.
9. Warwickshire Observatory website – ONS population estimates. Web link (accessed on 3/10/13):  
<http://www.warwickshireobservatory.org/observatorywcc.nsf/05a17cfbd3bcf85d802572920033cf0f/bfb8b0a1d34f274c802572c00048108f?OpenDocument>
10. Deprivation data produced by the Department for Communities and Local Government. File located at web link (accessed on 3/10/13):  
<https://www.gov.uk/government/publications/english-indices-of-deprivation-2010>  
Ward based population weighted averages calculated from LSOA specific data by the London Health Observatory and North East Public Health Observatory.
11. Fahrmeir L, Lang S. Bayesian Inference for Generalized Additive Mixed Models Based on Markov Random Field Priors. *Applied Statistics (JRSS C)*. 2001;50:201-20.
12. Kandala N-B, Tigbe W, Manda S, Stranges S. Spatial Variation of Predictors of Hypertension in Sub-Saharan Africa: A Case Study of South-Africa. *American Journal of Hypertension* 2013. 10.1093/ajh/hps063.
13. Belitz C, Brezger A, Kneib T, Lang S. BayesX Software for Bayesian Inference in Structured Additive Regression Models Version 2.0.1, 2012. Accessed at:  
[http://www.stat.uni-muenchen.de/~bayesx/manual/methodology\\_manual.pdf](http://www.stat.uni-muenchen.de/~bayesx/manual/methodology_manual.pdf)
14. Taken from the Warwickshire Observatory Quality of Life in Warwickshire 2012/13 report. Weblink (accessed on 3/10/13):  
[http://maps.warwickshire.gov.uk/iareports/environmental\\_issues/](http://maps.warwickshire.gov.uk/iareports/environmental_issues/)

**Author's contributions**

O B Conceived the idea analyzed the data, contributed to formulating the results and wrote the first draft.

N-B K analyzed the data, advised on statistical aspects, contributed to formulating the results wrote the second draft. CJ analyzed the data. J L helped coordinate the project and co-wrote the final draft; AC coordinated the project, advised on all aspects and co-wrote the final draft.

For peer review only

## Figure legends

1  
2  
3 **Figure 1 :** Warwickshire map with 2010 air quality index (all components of air pollution combined) displayed  
4 by ward (left; Warwickshire map with number of heart failure hospital admissions per 1000 population between  
5 2005 – 2013 displayed by ward(centre) and Warwickshire map with total heart failure deaths per 1000  
6 population between 2007 – 2012 displayed by ward(right).

7  
8 **Figure 2:** Left: Unadjusted total residual spatial effects of morbidity risk associated with heart failure, at ward  
9 level in Warwickshire. Shown is the posterior means. Right: Corresponding posterior probabilities at 80%  
10 nominal level.

11 **Figure 3:** Left: adjusted total residual spatial effects of morbidity risk associated with heart failure, at ward level  
12 in Warwickshire. Shown is the posterior means of the full model (IMD 2010, Over 50 and 4 indicators air  
13 pollution). Right: Corresponding posterior probabilities at 80% nominal level.

14  
15 **Figure 4:** Left: Unadjusted total residual spatial effects of mortality risk associated with heart failure, at ward  
16 level in Warwickshire. Shown is the posterior means. Right: Corresponding posterior probabilities at 90%  
17 nominal level.

18  
19 **Figure 5:** Left: Adjusted total residual spatial effects of mortality risk associated with heart failure, at ward level  
20 in Warwickshire. Shown is the posterior means of the full model (IMD 2010, Over 50 and 4 indicators air  
21 pollution). Right: Corresponding posterior probabilities at 80% nominal level.

22  
23 **Figure 6 –** Warwickshire map displaying the 2010 levels of deprivation (expressed as Multiple Deprivation  
24 Scores) by LSOAs. Produced by the Warwickshire Observatory (left) and Warwickshire map displaying the  
25 2008 midyear estimates of % of people over the age of 50 by SOA. Produced by the Warwickshire Observatory  
26 (right).

**Table 1: Posterior mean (PM) of fixed effects estimates of heart failure admission and mortality across air pollutions indicators (Warwickshire 2005-2013)**

| Variable                         | Heart failure admission<br>PM & 95%CI <sup>‡</sup> | Heart failure mortality<br>PM & 95%CI <sup>†</sup> |
|----------------------------------|----------------------------------------------------|----------------------------------------------------|
| Constant                         | 6.19 (3.84, 8.97)                                  | 4.13 (1.18, 7.43)                                  |
| Nitrogen dioxide indicator (No2) | 3.35 (1.89, 4.99)                                  | 4.30 (1.68, 7.37)                                  |
| Sulphur dioxide indicator (So2)) | 7.75 (-3.84, 17.99)                                | 11.02 (-1.21, 22.41)                               |
| Particulates indicator (Pm)      | -12.93 (-20.41, -6.54)                             | -14.69 (-23.46, -6.50)                             |
| Benzene indicator (Ben)          | [31.9:8.36, 55.85]                                 | 25.98 (-6.62, 54.22)                               |
| Over 50 years %                  | 0.70(-0.63, 1.98)                                  | 1.60, (0.47, 2.92)                                 |
| IMD 2010 score                   | 0.02 ( 0.01, 0.03)                                 | 0.00 (-0.01, 0.01)                                 |

<sup>‡</sup> Spatially adjusted posterior mean (PM) from Bayesian geo-additive regression models after controlling for fixed effect of all air pollutions indicators: Mono-nitrogen Oxide (NOx), sulphur dioxide (So2), particulate matter (Pm), benzene (Ben) and combined index and the county of residence (spatial effects). <sup>†</sup> Spatially adjusted posterior mean (PM) from Bayesian geo-additive regression models after controlling for fixed effect of all air pollutions indicators: Mono-nitrogen Oxide (NOx), sulphur dioxide (So2), particulate matter (Pm), benzene (Ben) and combined index and the county of residence (spatial effects).

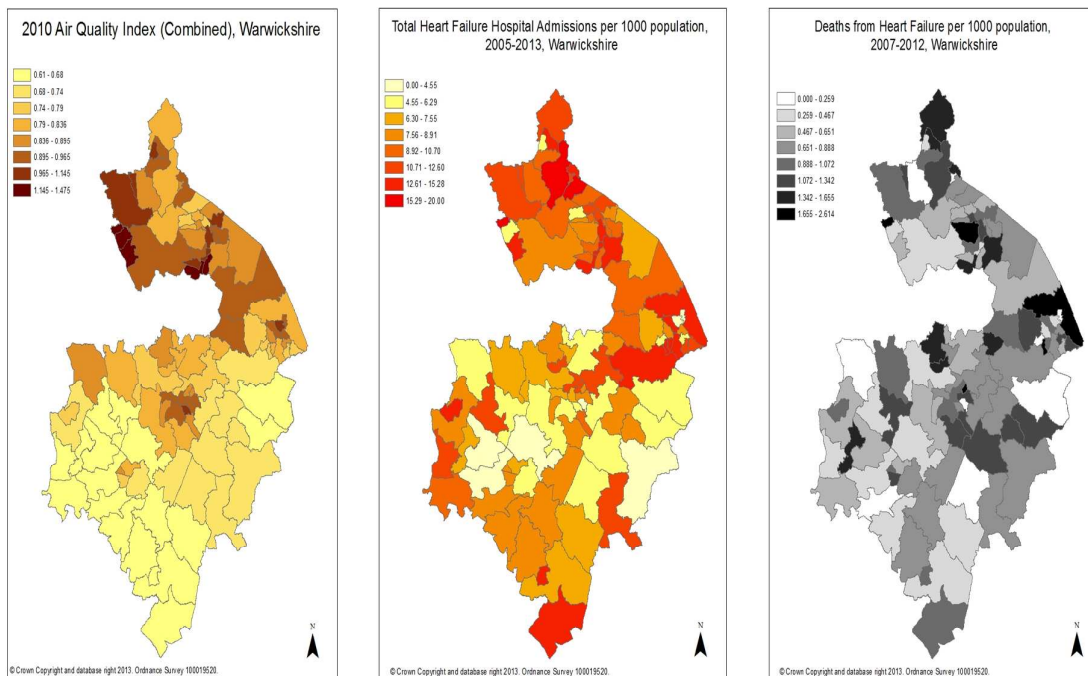

**Figure 1** – Warwickshire map with 2010 air quality index (all components of air pollution combined) displayed by ward (left; Warwickshire map with number of heart failure hospital admissions per 1000 population between 2005 – 2013 displayed by ward (centre) and Warwickshire map with total heart failure deaths per 1000 population between 2007 – 2012 displayed by ward (right).

Review only

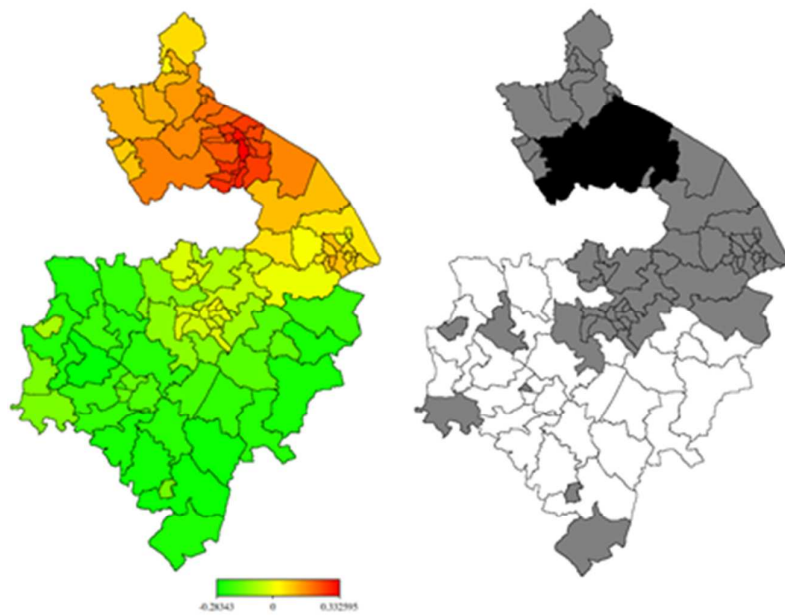

Red coloured – high risk  
Green coloured – low risk

Black coloured – significant positive spatial effect  
White coloured – significant negative spatial effect  
Grey coloured – no significant effect

**Figure 2:** Left: Unadjusted total residual spatial effects of morbidity risk associated with heart failure, at ward level in Warwickshire. Shown is the posterior means. Right: Corresponding posterior probabilities at 80% nominal level.

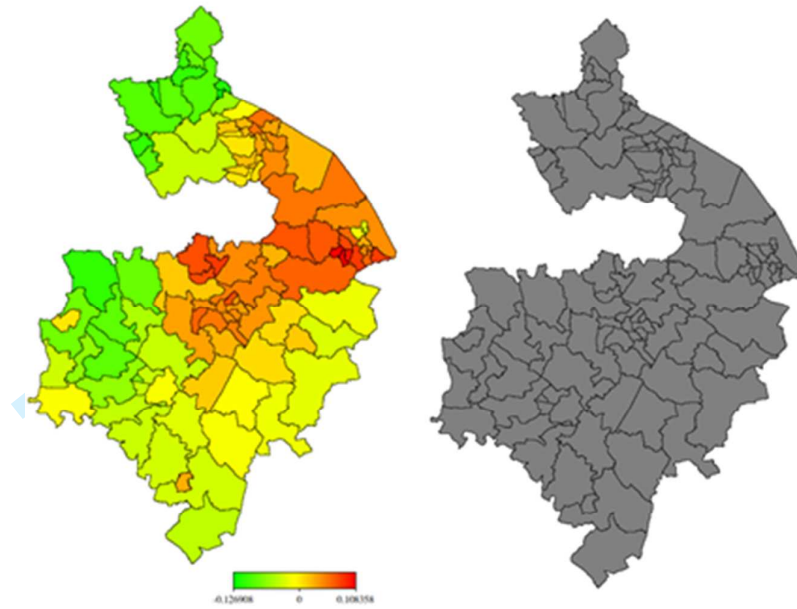

Red coloured – high risk  
Green coloured – low risk

Black coloured – significant positive spatial effect  
White coloured- significant negative spatial effect  
Grey coloured – no significant effect

**Figure 3:** Left: Total residual spatial effects of morbidity risk associated with heart failure, at ward level in Warwickshire. Shown is the posterior means of the full model (IMD 2010, Over 50 and 4 indicators air pollution). Right: Corresponding posterior probabilities at 80% nominal level.

1  
2  
3  
4  
5  
6  
7  
8  
9  
10  
11  
12  
13  
14  
15  
16  
17  
18  
19  
20  
21  
22  
23  
24  
25  
26  
27  
28  
29  
30  
31  
32  
33  
34  
35  
36  
37  
38  
39  
40  
41  
42  
43  
44  
45  
46  
47  
48  
49  
50  
51  
52  
53  
54  
55  
56  
57  
58  
59  
60

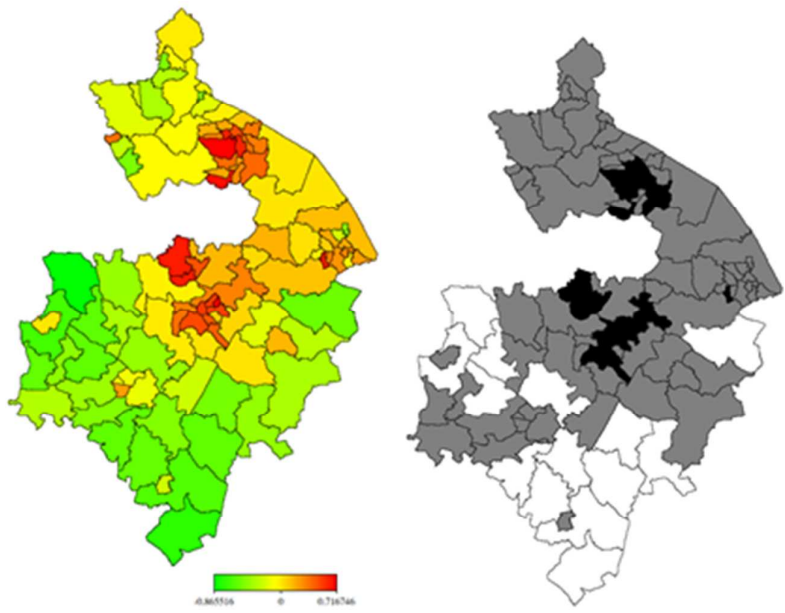

*Red coloured – high risk*  
*Green coloured – low risk*  
*Black coloured – significant positive spatial effect*  
*White coloured- significant negative spatial effect*  
*Grey coloured – no significant effect*

**Figure 4:** Left: Unadjusted total residual spatial effects of mortality risk associated with heart failure, at ward level in Warwickshire. Shown is the posterior means. Right: Corresponding posterior probabilities at 80% nominal level.



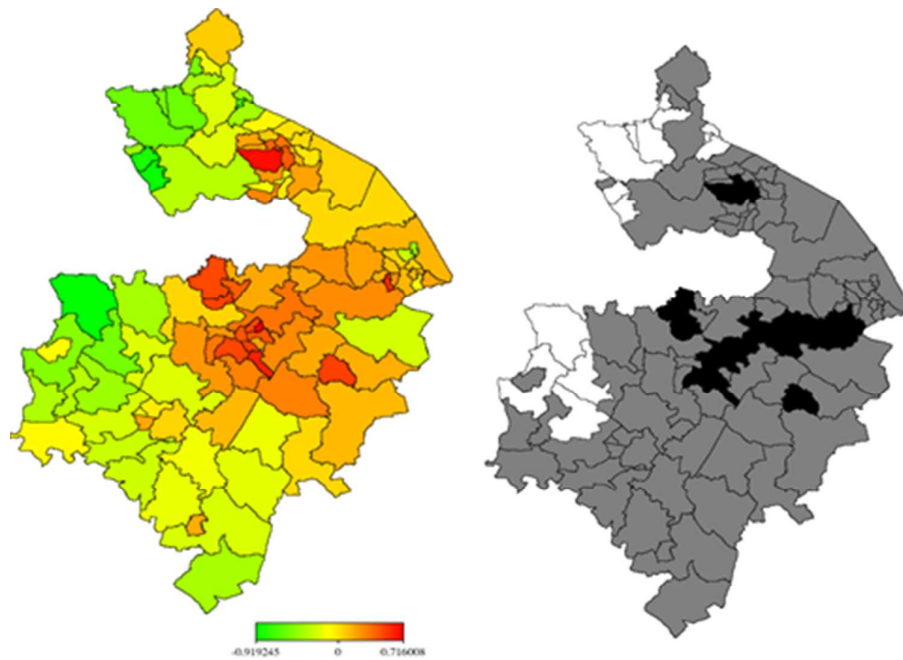

*Red coloured – high risk*  
*Green coloured – low risk*

*Black coloured – significant positive spatial effect*  
*White coloured – significant negative spatial effect*  
*Grey coloured – no significant effect*

**Figure 5:** Left: Total residual spatial effects of mortality risk associated with heart failure, at ward level in Warwickshire. Shown is the posterior means of the full model (IMD 2010, Over 50 and 4 indicators air pollution). Right: Corresponding posterior probabilities at 80% nominal level.

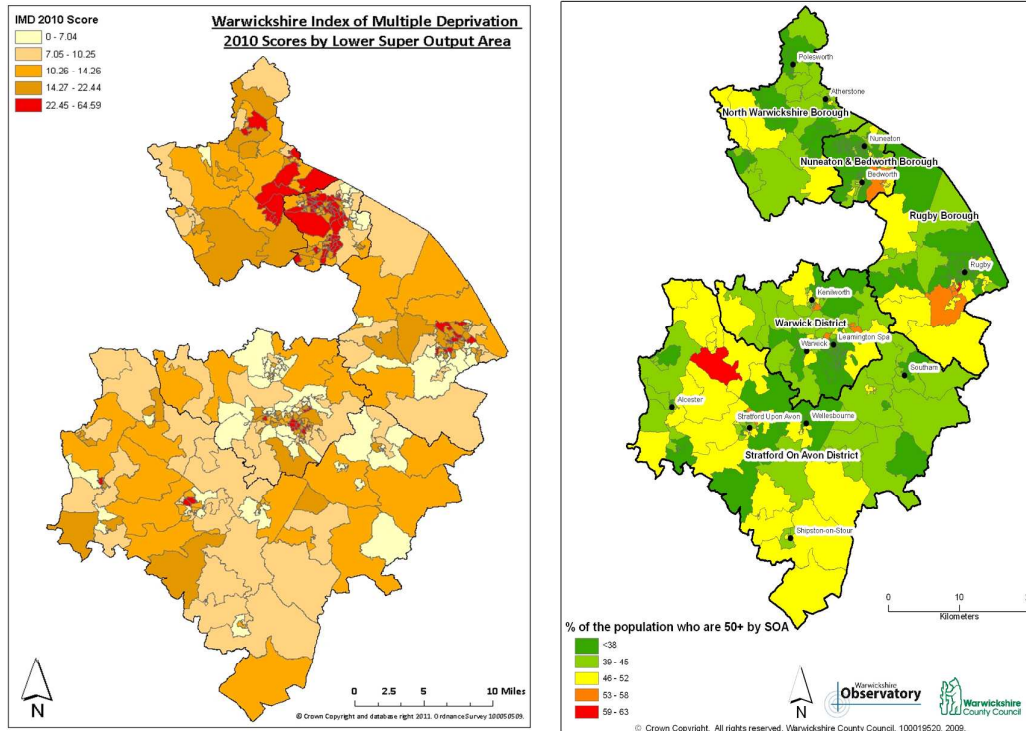

**Figure 6** – Warwickshire map displaying the 2010 levels of deprivation (expressed as Multiple Deprivation Scores) by LSOAs. Produced by the Warwickshire Observatory (left) and Warwickshire map displaying the 2008 midyear estimates of % of people over the age of 50 by SOA. Produced by the Warwickshire Observatory (right).

STROBE 2007 (v4) Statement—Checklist of items that should be included in reports of *cross-sectional studies*

| Section/Topic                | Item # | Recommendation                                                                                                                                                                       | Reported on page # |
|------------------------------|--------|--------------------------------------------------------------------------------------------------------------------------------------------------------------------------------------|--------------------|
| Title and abstract           | 1      | (a) Indicate the study's design with a commonly used term in the title or the abstract                                                                                               | 2                  |
|                              |        | (b) Provide in the abstract an informative and balanced summary of what was done and what was found                                                                                  | 2                  |
| <b>Introduction</b>          |        |                                                                                                                                                                                      |                    |
| Background/rationale         | 2      | Explain the scientific background and rationale for the investigation being reported                                                                                                 | 4                  |
| Objectives                   | 3      | State specific objectives, including any prespecified hypotheses                                                                                                                     | 4,5                |
| <b>Methods</b>               |        |                                                                                                                                                                                      |                    |
| Study design                 | 4      | Present key elements of study design early in the paper                                                                                                                              | 4, 5               |
| Setting                      | 5      | Describe the setting, locations, and relevant dates, including periods of recruitment, exposure, follow-up, and data collection                                                      | 5,6                |
| Participants                 | 6      | (a) Give the eligibility criteria, and the sources and methods of selection of participants                                                                                          | 5,6,               |
| Variables                    | 7      | Clearly define all outcomes, exposures, predictors, potential confounders, and effect modifiers. Give diagnostic criteria, if applicable                                             | 5-7                |
| Data sources/<br>measurement | 8*     | For each variable of interest, give sources of data and details of methods of assessment (measurement). Describe comparability of assessment methods if there is more than one group | 5-6                |
| Bias                         | 9      | Describe any efforts to address potential sources of bias                                                                                                                            | 7-8,12             |
| Study size                   | 10     | Explain how the study size was arrived at                                                                                                                                            | 5                  |
| Quantitative variables       | 11     | Explain how quantitative variables were handled in the analyses. If applicable, describe which groupings were chosen and why                                                         | 7-8                |
| Statistical methods          | 12     | (a) Describe all statistical methods, including those used to control for confounding                                                                                                | 7,8                |
|                              |        | (b) Describe any methods used to examine subgroups and interactions                                                                                                                  | NA                 |
|                              |        | (c) Explain how missing data were addressed                                                                                                                                          | NA                 |
|                              |        | (d) If applicable, describe analytical methods taking account of sampling strategy                                                                                                   | NA                 |
|                              |        | (e) Describe any sensitivity analyses                                                                                                                                                | NA                 |
| <b>Results</b>               |        |                                                                                                                                                                                      |                    |

|                          |     |                                                                                                                                                                                                              |        |
|--------------------------|-----|--------------------------------------------------------------------------------------------------------------------------------------------------------------------------------------------------------------|--------|
| Participants             | 13* | (a) Report numbers of individuals at each stage of study—eg numbers potentially eligible, examined for eligibility, confirmed eligible, included in the study, completing follow-up, and analysed            | 2, 5,6 |
|                          |     | (b) Give reasons for non-participation at each stage                                                                                                                                                         | NA     |
|                          |     | (c) Consider use of a flow diagram                                                                                                                                                                           | NA     |
| Descriptive data         | 14* | (a) Give characteristics of study participants (eg demographic, clinical, social) and information on exposures and potential confounders                                                                     | 6      |
|                          |     | (b) Indicate number of participants with missing data for each variable of interest                                                                                                                          | NA     |
| Outcome data             | 15* | Report numbers of outcome events or summary measures                                                                                                                                                         | 10-11  |
| Main results             | 16  | (a) Give unadjusted estimates and, if applicable, confounder-adjusted estimates and their precision (eg, 95% confidence interval). Make clear which confounders were adjusted for and why they were included | 8      |
|                          |     | (b) Report category boundaries when continuous variables were categorized                                                                                                                                    | NA     |
|                          |     | (c) If relevant, consider translating estimates of relative risk into absolute risk for a meaningful time period                                                                                             | NA     |
| Other analyses           | 17  | Report other analyses done—eg analyses of subgroups and interactions, and sensitivity analyses                                                                                                               | NA     |
| <b>Discussion</b>        |     |                                                                                                                                                                                                              |        |
| Key results              | 18  | Summarise key results with reference to study objectives                                                                                                                                                     | 8-10   |
| Limitations              | 19  | Discuss limitations of the study, taking into account sources of potential bias or imprecision. Discuss both direction and magnitude of any potential bias                                                   | 11, 15 |
| Interpretation           | 20  | Give a cautious overall interpretation of results considering objectives, limitations, multiplicity of analyses, results from similar studies, and other relevant evidence                                   | 11-15  |
| Generalisability         | 21  | Discuss the generalisability (external validity) of the study results                                                                                                                                        | 11-15  |
| <b>Other information</b> |     |                                                                                                                                                                                                              |        |
| Funding                  | 22  | Give the source of funding and the role of the funders for the present study and, if applicable, for the original study on which the present article is based                                                | NA     |

\*Give information separately for cases and controls in case-control studies and, if applicable, for exposed and unexposed groups in cohort and cross-sectional studies.

**Note:** An Explanation and Elaboration article discusses each checklist item and gives methodological background and published examples of transparent reporting. The STROBE checklist is best used in conjunction with this article (freely available on the Web sites of PLoS Medicine at <http://www.plosmedicine.org/>, Annals of Internal Medicine at <http://www.annals.org/>, and Epidemiology at <http://www.epidem.com/>). Information on the STROBE Initiative is available at [www.strobe-statement.org](http://www.strobe-statement.org).

# BMJ Open

## Spatial variation of Heart Failure and Air Pollution in Warwickshire, UK: An investigation of small scale variation at the ward-level

|                                 |                                                                                                                                                                                                                                                                                                                                                                                                  |
|---------------------------------|--------------------------------------------------------------------------------------------------------------------------------------------------------------------------------------------------------------------------------------------------------------------------------------------------------------------------------------------------------------------------------------------------|
| Journal:                        | <i>BMJ Open</i>                                                                                                                                                                                                                                                                                                                                                                                  |
| Manuscript ID:                  | bmjopen-2014-006028.R1                                                                                                                                                                                                                                                                                                                                                                           |
| Article Type:                   | Research                                                                                                                                                                                                                                                                                                                                                                                         |
| Date Submitted by the Author:   | 19-Aug-2014                                                                                                                                                                                                                                                                                                                                                                                      |
| Complete List of Authors:       | Bennett, Oscar; Warwickshire County Council, Public Health Warwickshire,Communities Group<br>Kandala, Ngianga-Bakwin; University of Warwick, Warwick Medical School<br>Ji, Chen; University of Warwick, Warwick Medical School<br>Linnane, John; Warwickshire County Council, Public Health Warwickshire,Communities Group<br>Clarke, Aileen; University of Warwick, Division of Health Sciences |
| <b>Primary Subject Heading</b>: | Epidemiology                                                                                                                                                                                                                                                                                                                                                                                     |
| Secondary Subject Heading:      | Cardiovascular medicine, Epidemiology, Public health                                                                                                                                                                                                                                                                                                                                             |
| Keywords:                       | Heart failure < CARDIOLOGY, EPIDEMIOLOGY, SOCIAL MEDICINE                                                                                                                                                                                                                                                                                                                                        |
|                                 |                                                                                                                                                                                                                                                                                                                                                                                                  |

SCHOLARONE™  
Manuscripts

1  
2  
3 **Spatial variation of Heart Failure and Air Pollution in Warwickshire, UK:**  
4 **An investigation of small scale variation at the ward-level**  
5  
6

7 *Oscar Bennett MB BChir<sup>1</sup>, Ngianga-Bakwin Kandala PhD<sup>2,3</sup>, Chen Ji PhD<sup>2</sup>, John Linnane*  
8 *MD FFPHM<sup>1</sup>, Aileen Clarke MD PhD<sup>2</sup>*  
9

10  
11  
12 <sup>1</sup> Public Health Warwickshire, Communities Group, Warwickshire County Council ,Shire  
13 Hall, Barrack Street, Warwick, CV34 4RL, UK.

14 <sup>2</sup> Division of Health Sciences, University of Warwick Medical School, Coventry, CV4 7AL,  
15 UK.

16 <sup>3</sup> Division of Epidemiology and Biostatistics, School of Public Health, University of  
17 Witwatersrand, Johannesburg , South Africa.  
18  
19

20  
21  
22  
23  
24 **Running title:** Heart Failure and Air Pollution in Warwickshire  
25

26 **Keywords:** Warwickshire, Heart Failure, Air Pollution, epidemiology, spatial analyses  
27  
28

29  
30 **Correspondence to:**

31 Ngianga-Bakwin Kandala, PhD  
32 Division of Health Sciences  
33 University of Warwick Medical School  
34 Medical School Building  
35 Gibbet Hill Campus  
36 Coventry CV4 7AL  
37 United Kingdom  
38 Tel: + 44 (0) 2476150541  
39 Fax: + 44 (0) 2476528375  
40 Email: N-B.Kandala@[warwick.ac.uk](mailto:N-B.Kandala@warwick.ac.uk)  
41  
42  
43  
44  
45  
46  
47  
48  
49  
50  
51  
52  
53  
54  
55  
56  
57  
58  
59  
60

## Abstract

**Objectives:** To spatially map the morbidity and mortality caused by heart failure within Warwickshire to characterise and quantify any influence of air pollution on these risks.

**Design:** Cross-sectional.

**Setting:** Warwickshire, United Kingdom

**Participants:** Data from all of the 105 current Warwickshire County wards were collected on hospital admissions and deaths due to heart failure.

### Results

In multivariate analyses, the presence of a higher NO<sub>x</sub> in a ward [3.35:1.89, 4.99], Ben [31.9:8.36, 55.85] and IMD [0.02: 0.01, 0.03], were consistently associated with a higher risk of heart failure morbidity. Pm [-12.93:-20.41, -6.54] was negatively associated with the risk of heart failure morbidity. No association was found between So<sub>2</sub> and heart failure morbidity. The risk of heart failure mortality was higher in wards with a higher NO<sub>x</sub> [4.30:1.68, 7.37] and wards with more inhabitants 50+ years old [1.60: 0.47, 2.92]. Pm was negatively associated [-14.69: -23.46, -6.50] with heart failure mortality. So<sub>2</sub>, Ben, and IMD score were not associated with heart failure mortality.

There was a prominent variation in heart failure morbidity and mortality risk across wards, the highest risk being in the regions around Nuneaton and Bedworth.

### Conclusion

This study showed distinct spatial patterns in heart failure morbidity and mortality, suggesting the potential role of environmental factors beyond individual-level risk factors. Air pollution levels should therefore be taken into account when considering the wider determinants of public health and the impact that changes in air pollution might have on the health of a population.

## ARTICLE FOCUS

- Air pollution has been linked to the development and exacerbation of a number of health problems including cardiovascular diseases such as heart failure.
- Heart failure is a serious condition that unfortunately affects many people in the UK. This link seems especially clear for cardiovascular and respiratory diseases such as ischaemic heart disease, heart failure, asthma, influenza, and lung cancer
- It is well established that the ambient levels of air pollution in a region can have an impact on the health status of the population which inhabits it

## KEY MESSAGES

1. Using a novel approach, this study has characterised and quantified the potential role of environmental factors (air pollutants) at the county-level.
2. The presence of a higher Mono-nitrogen Oxide (NO<sub>x</sub>) in a ward, benzene and poor Index of Multiple Deprivation (IMD) score were consistently associated with a higher risk of heart failure morbidity. Particulate matter (Pm) was negatively associated with the risk of heart failure morbidity.
3. The risk of heart failure mortality was higher in wards with a higher NO<sub>x</sub> and wards with more inhabitants 50+ years old. Pm was negatively associated with heart failure mortality.
4. Air pollution overall, when all pollution components were brought together into a combined index, was positively associated with both heart failure morbidity and mortality across Warwickshire.
5. There was a striking variation in heart failure morbidity and mortality risk across wards, the highest risk being in the regions around Nuneaton and Bedworth.

## STRENGTHS AND LIMITATIONS

- The model employed a fully Bayesian approach using Markov Chain Monte Carlo (MCMC) techniques for inference and model checking<sup>(11, 12)</sup>
- A single air pollution measurement in 2010 was used and it was assumed that there was no significant change in this value over the 2005-2013 periods that mortality and hospital admission data was gathered from.
- The cross-sectional nature of the study unfortunately does not allow us to establish temporality and thus clearly demonstrate causality of the observed associations.
- This was an ecological study, analysing characteristics and risk at the ward rather than individual level. Consequently associations and conclusions found from the aggregate data may not be directly applicable to individuals.



## Introduction

Air pollution has been linked to the development and exacerbation of a number of health problems. This link seems especially clear for cardiovascular and respiratory diseases such as ischaemic heart disease, heart failure, asthma, influenza, and lung cancer<sup>(1, 2, 3, 4)</sup>. It is well established that the ambient levels of air pollution in a region can have an impact on the health status of the population which inhabits it<sup>(5)</sup>. Air pollution levels should therefore be taken into account when considering the wider determinants of public health and the impact that changes in air pollution might have on the health of a population.

Warwickshire is an English county within the United Kingdom approximately 70 miles North-West of London. The issue of air pollution has been highlighted in Warwickshire recently by the setting up of Air Quality Management Areas (AQMAs) in a number of different parts of the county. These are specific areas in the county that have been identified as places where, without a focused local council strategy to reduce air pollution, future government targets for air pollutant concentrations may not be met. Within Warwickshire the specific air pollutant that has been identified as a problem and led to these special areas being setup is mono-nitrogen oxides (NO<sub>x</sub>)<sup>(6)</sup>.

The objective of the present study was therefore to look for any relationship between levels of air pollution and the morbidity and mortality associated with heart failure within Warwickshire in the last few years (2005-2013 for morbidity, 2007-2012 for mortality). We examined a range of traditional air pollutants for an ecological association with heart failure morbidity and mortality at the county level. Furthermore, the present analysis attempted to highlight spatial patterns in heart failure morbidity and mortality risk within the county, after multiple adjustments for proximate, county-level factors. The geographic locations of wards within the county can be considered as proxy measures of many other unmeasured factors such as availability and access to health services, individual health seeking behaviour,

1 preventive ward policy and general ward factors. Such estimates might illustrate how much  
2  
3 can be learned by detailed exploratory analyses as well as how these data can be used to  
4  
5 strategically inform policy aiming at the prevention and management of serious conditions  
6  
7 such as heart failure in these settings.  
8  
9

### 10 11 12 **The evidence from published literature for the link between air pollution and health** 13 **problems** 14 15

16  
17 Studies have shown an effect on the health of populations caused by both long term exposure  
18  
19 as well as short term “spikes” in local air pollution levels<sup>(5)</sup>.  
20

21 A relevant systematic review and meta-analysis has been published recently in the Lancet<sup>(2)</sup>.  
22

23 It pooled the results of studies that have been conducted worldwide looking at the temporal  
24  
25 relationship between the levels of a number of different air pollutants with local heart failure  
26  
27 hospital admission rates and mortality rates. This showed a clear link between short term rises  
28  
29 in all types of air pollution (except ozone) and rises in hospital admissions and mortality due  
30  
31 to heart failure. This study did not look at any potential effects from long term exposure to air  
32  
33 pollution. However it did provide strong evidence that air pollution can ‘exacerbate’ heart  
34  
35 failure, increasing the likelihood that a patient with existing heart failure will become  
36  
37 sufficiently unwell to require hospital admission, or even die.  
38  
39

40  
41 The ESCAPE study<sup>(3)</sup>, published recently in the Lancet Oncology, pooling the results of 17  
42  
43 cohort studies from around Europe looked at the ambient levels of air pollution in an area  
44  
45 (particulate matter and NO<sub>x</sub>) and the incidence of lung cancers in the inhabitants of this area  
46  
47 during many years of follow up (mean 12.8 years). This was intended to look at the risk  
48  
49 associated with long term exposure to air pollution. A statistically significant correlation was  
50  
51 found between the levels of particulate matter air pollution and the local incidence of lung  
52  
53 cancer diagnoses. Particulate matter with a diameter of less than 10 µm had a hazard ratio of  
54  
55 1.22 [95% CI 1.03-1.45] per (10 µg/cubic meter). In other words, for every increase in  
56  
57  
58  
59  
60

1 particulate matter pollution of 10 µg/cubic meter there was a corresponding immediate  
2  
3 increase in the chance of being diagnosed with lung cancer of 22% (95% CI 3% - 45%).  
4  
5 There was also a correlation between traffic volume within 100m of a residence and a modest  
6  
7 increase in the rate of lung cancer (Hazard ratio 1.09 (CI 0.99-1.21)). No similar correlation  
8  
9 was found with NO<sub>x</sub> air pollution. This suggests that long term exposure to higher levels of  
10  
11 particulate matter air pollution may increase the incidence of lung cancer in a population.  
12  
13  
14 Another study published in the United States in 2004 looked at the long term effect of  
15  
16 exposure to particulate matter air pollution and the mortality attributed to different  
17  
18 cardiovascular and respiratory diseases in different areas of the United States<sup>(4)</sup>. A good  
19  
20 correlation was found between the degree of long term exposure to particulate matter air  
21  
22 pollution and increases in mortality from cardiovascular diseases, including heart failure.  
23  
24 Interestingly this was not found to be the case for most respiratory diseases. There was also an  
25  
26 element of the study that looked at the effect of a person's smoking status on the mortality  
27  
28 statistics. This found, as expected, a strong link between mortality and smoking. However it  
29  
30 also found that air pollution contributed additional cardiovascular mortality risk on top of that  
31  
32 attributed to smoking. This was at least an additive, if not a synergistic effect.  
33  
34  
35  
36  
37  
38

## 39 **Methods**

### 40 *Study data*

41  
42 In order to carry out this project, data was collected about the geographical distribution of air  
43  
44 pollution within Warwickshire. This data included information about each of four individual  
45  
46 components of air pollution (NO<sub>x</sub>, sulphur dioxide, particulate matter, and benzene) which  
47  
48 could then be united into a combined index (all of the contributions added together). A single  
49  
50 recorded level from 2010 of each air pollutant for each ward was used in the study. This was  
51  
52 then compared to collected data about:  
53  
54  
55  
56  
57  
58  
59  
60

- 1 (i) The geographical distribution of home addresses of patients who were admitted to  
2 hospital because of heart failure or a complication of heart failure. Hospital  
3 admission rate in an area due to heart failure was used as a proxy indicator for the  
4 level of heart failure morbidity within that area.  
5  
6 (ii) The geographical distribution of home addresses of patients who died from heart  
7 failure, or whose death was contributed to by heart failure.  
8  
9

10 These data were collected by the Warwickshire Observatory, which is part of the  
11 Warwickshire County Council in charge of collecting and handling statistics relating to the  
12 county. Mortality data for the analysis was supplied via the Warwickshire Public Health  
13 Intelligence Team and was sourced from the Public Health Mortality Files, Office for  
14 National Statistics. Hospital admissions data was accessed via the Ventris Business  
15 Intelligence System, Arden Commissioning Support Unit."  
16  
17

18 Ward level population data were obtained from the 2011 census. Warwickshire is divided into  
19 105 wards. Data from all of the 105 current Warwickshire County wards were collected.  
20 The potential confounding variables of firstly age structure of a population within a ward and  
21 secondly levels of social deprivation within a ward were identified<sup>(7,8)</sup>. These were then  
22 controlled for in the second stage of the statistical analysis (see below).  
23  
24

25 Information about the age structure of wards was obtained from the Office of National  
26 Statistics mid 2010 estimates (obtained from the Warwickshire Observatory website)<sup>(9)</sup>. The  
27 representative statistical value of “percentage (%) of population above age 50” was used as an  
28 indicator of wards with a higher proportion of older people.  
29

30 Information about social deprivation was obtained from the English Indices of Deprivation  
31 published by the Department for Communities and Local Government<sup>(10)</sup>. The Index of  
32 Multiple Deprivation (IMD) averaged across each ward was used as an indicator of the level  
33 of deprivation within the wards of Warwickshire.  
34  
35  
36  
37  
38  
39  
40  
41  
42  
43  
44  
45  
46  
47  
48  
49  
50  
51  
52  
53  
54  
55  
56  
57  
58  
59  
60

1 The information on crude observed air pollution level distribution, heart failure hospital  
 2 admission rates and mortality rates were then represented on maps of Warwickshire (Figure  
 3 1).  
 4  
 5  
 6  
 7  
 8  
 9

### 10 *Statistical Analysis*

11 To account for spatial autocorrelation in observed heart failure hospital admission and  
 12 mortality rates at the ward level, in Warwickshire, we applied a unified approach to account  
 13 for possible air pollution effects of environmental risk factors. This was achieved using a geo-  
 14 additive semi-parametric mixed model. The model employed a fully Bayesian approach using  
 15 Markov Chain Monte Carlo (MCMC) techniques for inference and model checking<sup>(11, 12)</sup>.  
 16 Response variables were defined as the count (per 1000 population) of heart failure morbidity  
 17 or mortality in a ward (Poisson model):  $y_i / \eta_i, \delta \sim B(\eta_i, \delta)$  for a binomial formulation.

18 (Poisson model):  $y_i / \eta_i, \delta \sim B(\eta_i, \delta)$  (1) for a binomial formulation and a geo-additive semi-  
 19 parametric predictor  $\mu_i = h(\eta_i)$ :

$$20 \eta_i = f_1(x_{i1}) + \dots + f_p(x_{ip}) + f_{spat}(s_i) + \epsilon_i \quad (2)$$

21 where  $h$  is a known response function with a poisson link function,  $f_1, \dots, f_p$  are non-linear  
 22 smoothed effects of the metrical covariates (time in years), and  $f_{spat}(s_i)$  is the effect of the  
 23 spatial covariate  $s_i \in \{1, \dots, S\}$  labelling the ward in Warwickshire. Regression models with  
 24 predictors such as those in equation 2 are sometimes referred to as geo-additive models. P-  
 25 spline priors were assigned to the functions  $f_1, \dots, f_p$ , and a Markov random field prior was  
 26 used for  $f_{spat}(s_i)$ . More detailed information about the modelling approach can be found  
 27 elsewhere<sup>(11, 13)</sup>. The standard measure of effect was the posterior mean (PM) and 95%  
 28 credible region (CR).  
 29  
 30  
 31  
 32

33 The analysis was carried out using version 2.0.1 of the BayesX software package, which  
 34 permits Bayesian inference based on MCMC simulation techniques<sup>(13)</sup>. Multivariate Bayesian  
 35 geo-additive regression models were used to evaluate the significance of the posterior mean  
 36  
 37  
 38  
 39  
 40  
 41  
 42  
 43  
 44  
 45  
 46  
 47  
 48  
 49  
 50  
 51  
 52

(PM) determined for the fixed effects and spatial effects between air pollution and the morbidity and mortality from heart failure within Warwickshire. Each component of air pollution was looked at separately and then also the combined index in unadjusted models. Next, fully adjusted multivariate Bayesian geo-additive regressions analysis were performed to look again for statistically significant correlation between these variables, but this time further controlling for any influence from age structure or social deprivation.

## Results

**Figure 1** and **Figure 6** display the observed data collected for this study on maps using graduated colouring to represent data value categories within each ward.

### *Observed Air Quality Map*

**Figure 1left** was produced using 2010 data from the Warwickshire Observatory. It is based on a combined air quality indicator which is a combination of information about the contribution to air pollution from NO<sub>x</sub>, sulphur dioxide, particulate matter, and benzene. The Warwickshire Observatory description of this index reads as follows:

“Combined Air Quality Indicator (estimates of emissions for four pollutants: benzene, nitrogen dioxide, sulphur dioxide and particulates) for small areas (modelled to 1 km grid squares) where an index value of 1 is equivalent to the national standard for each pollutant. The values are then summed so an overall score of 4 would represent all four pollutants being present at the national standard level.”<sup>(14)</sup> These specific standards are described in the Air Quality Standards Regulations 2010.

The geographical pattern of the observed air pollution across the county shows a higher level of air pollution near the more urban centres of Birmingham and Coventry. The proximity of parts of the county to motorways such as the M6 and M42 could also be a contributing factor

1 to the observed pattern. There was no place in the county where the level of any pollutant  
2 exceeded the national standard in 2010.  
3  
4

5  
6  
7 *Heart Failure Hospital Admission Map*  
8

9 **Figure 1centre** shows the geographical distribution of the density of home addresses of  
10 patients admitted to hospital with a diagnosis of heart failure (or exacerbation of heart failure)  
11 within the April 2005- April 2013 period.  
12  
13  
14

15  
16  
17  
18 *Heart Failure Mortality Map*  
19

20 **Figure 1right** shows the geographical distribution of the density of home addresses of  
21 patients who died either directly or in part from heart failure in the 2007-2012 (inclusive)  
22 periods.  
23  
24  
25  
26  
27  
28  
29

30 **Table 1** (left panel) displays posterior means of heart failure admission across the selected  
31 covariates following multivariate Bayesian geo-additive regression analyses.  
32  
33

34 The Posterior mean (PM) & 95% Credible Region (CR) of overall hospital admission rates  
35 due to heart failure and mortality rates from heart failure were [6.19 (3.84, 8.97)] and [4.13  
36 (1.18, 7.43)] (Table 2) respectively. On average, the presence of a higher Mono-nitrogen  
37 oxide indicator (NO<sub>x</sub>) in a ward [Posterior mean (PM) & 95% Credible Region (CR): 3.35  
38 (1.89, 4.99)], Benzene indicator (Ben) [31.9 (8.36, 55.85)] and IMD 2010 score [0.02 (0.01,  
39 0.03)], were consistently associated with higher risk of heart failure morbidity. The  
40 particulates indicator (Pm) [-12.93 (-20.41, -6.54)] was negatively associated with the risk of  
41 heart failure morbidity. Sulphur dioxide indicator (So<sub>2</sub>) was not associated with heart failure  
42 morbidity.  
43  
44  
45  
46  
47  
48  
49  
50  
51  
52  
53  
54  
55  
56  
57  
58  
59  
60

1 **Table 1** (right panel) shows the same corresponding results for heart failure mortality. This  
2  
3 table shows that the risk of heart failure mortality was higher in wards with a higher Mono-  
4  
5 nitrogen oxide indicator (NOx) [4.30 (1.68, 7.37)] and wards with more inhabitants over 50  
6  
7 years old [1.60 (0.47, 2.92)]. The particulates indicator (Pm) was negatively associated with  
8  
9 heart failure mortality. The sulphur dioxide indicator (So2), Benzene indicator (Ben), and  
10  
11 IMD score were not associated with heart failure mortality.  
12  
13

14  
15  
16  
17 The combined air pollution index (all indicators averaged together) when incorporated into a  
18  
19 separate model combining age and social deprivation was significantly positively associated  
20  
21 with both heart failure morbidity [1.39 (0.87, 1.81)] and mortality [1.79 (0.85, 2.55)] across  
22  
23 the county.  
24  
25

26  
27 In **Figure 2** and **Figure 4**, the left-hand maps show the unadjusted estimates of posterior total  
28  
29 residual ward means of heart failure morbidity and mortality respectively. In **Figure 3** and  
30  
31 **Figure 5**, the left-hand maps show the adjusted PM after multiple adjustment for the  
32  
33 geographical location, taking into account the auto-correlation structure in the data, the  
34  
35 uncertainty in the ward level and all ward-level risk factors (air pollution components, age,  
36  
37 social deprivation) for heart failure morbidity and mortality respectively. The red colour  
38  
39 indicates the maximum posterior mean recorded while green denotes the lowest mean. The  
40  
41 right-hand maps in **Figures 2, 3, 4** and **5** show the 95% posterior probability of heart failure  
42  
43 and mortality, which indicate the statistical significance associated with the total excess risk.  
44  
45 Black colour indicates a negative spatial effect (associated with increased risk of heart failure  
46  
47 and mortality), white colour a positive effect (a decreased risk) and grey colour a non-  
48  
49 significant effect.  
50  
51  
52

53  
54  
55 In general, there was consistently higher heart failure morbidity risk in northern wards  
56  
57 particularly around Nuneaton and Bedworth and lower heart failure morbidity risks in the  
58  
59  
60



1 southern wards particularly within the district of Stratford-on-Avon. However, all this  
2 variation could partially be accounted for within the model generated within this study (taking  
3 into account air pollution, age, and social deprivation levels).  
4  
5  
6  
7

8 Heart failure mortality risk was, in general, higher in northern wards around Nuneaton and  
9 Bedworth as well as in some central areas around Warwick, Royal Leamington Spa, and  
10 Kenilworth. Heart failure mortality risk was again lower in more southern wards particularly  
11 within Stratford-on-Avon. Unlike with morbidity however, our model could not explain all  
12 this variation in heart failure mortality. Even after taking into account air pollution, age, and  
13 social deprivation the rate of death from heart failure remained significantly higher than  
14 would be expected in areas within and around Nuneaton, Bedworth, Warwick, Royal  
15 Leamington Spa, and Kenilworth.  
16  
17  
18  
19  
20  
21  
22  
23  
24  
25

26 In sensitivity analyses, we tested several models and our results were not substantially altered  
27 after removing one or two pollutant (data not shown).  
28  
29  
30  
31  
32  
33  
34

## 35 Discussion

36 Before even considering air pollution, this study helps to demonstrate the inequality of risk  
37 from heart failure disease and death that exists for individuals living in different parts of the  
38 county of Warwickshire. There is a significant excess risk of both disease and death in more  
39 northern wards within and surrounding Nuneaton and Bedworth. Much (but not all) of this  
40 variation could be attributed to the air pollution, age structure and social deprivation that  
41 exists in these areas according to our model. Measures that seek to address air pollution and  
42 social deprivation could be expected therefore to help mitigate against cardiovascular risks  
43 within these local populations.  
44  
45  
46  
47  
48  
49  
50  
51  
52  
53  
54  
55  
56  
57  
58  
59  
60

1 The present study corroborates the notion that air pollution is an increasingly important public  
2 health issue in Warwickshire. Higher levels of the average air pollution index looked at in this  
3 study correlated significantly with increased levels of both heart failure morbidity and  
4 mortality across the county, even after removing the effects of age structure and social  
5 deprivation. The individual component of NO<sub>x</sub> air pollution seems particularly to contribute  
6 risk to both the morbidity and mortality of heart failure within the county, suggesting that it  
7 may have a particularly detrimental effect on heart failure patients. This reinforces the  
8 importance of the AQMAs set up within the county in response to high NO<sub>x</sub> levels. Road  
9 traffic is a large contributor to air pollution within Warwickshire. Diesel engines are  
10 responsible for a large part of the NO<sub>x</sub> component of these emissions.  
11  
12  
13  
14  
15  
16  
17  
18  
19  
20  
21  
22

23 An unexpected result also appeared within our analysis. Particulate matter air pollution  
24 became significantly, negatively correlated with both heart failure morbidity and mortality  
25 when incorporated into our model with all risk factors taken into account and controlled for in  
26 this study. This would imply some sort of unexpected “protective influence” from particulate  
27 matter air pollution on heart failure patients. This clearly contradicts our expectations and is at  
28 odds with a wealth of existing evidence that indicates that particulate matter air pollution  
29 contributes risk to and exacerbates cardiovascular disease<sup>(4)</sup>.  
30  
31  
32  
33  
34  
35  
36  
37  
38  
39  
40

41 We offer a possible explanation for this based on the following four observations:

- 42 1. The above-mentioned negative correlation of particulate matter air pollution with heart  
43 failure morbidity and mortality in our model.  
44
- 45 2. Particulate matter air pollution actually varied very little across the county compared  
46 to the other types of air pollution. All types of air pollution tended to decrease in rural  
47 areas, but particulate matter tended to decrease much *less* compared to the other  
48 components of air pollution. Consequently in rural areas of the county where most  
49  
50  
51  
52  
53  
54  
55  
56  
57  
58  
59  
60

1 types of air pollution are significantly lower, particulate matter pollution was  
2 relatively higher compared to NOx, Benzene, and SO2.  
3

- 4
- 5 3. There seems to be a high risk of heart failure deaths in urban centres (particularly  
6 Nuneaton, Bedworth, Warwick, Royal Leamington Spa, and Kenilworth), higher than  
7 can be explained by our model.  
8
  - 9 4. Conversely, there seems to be a particularly low risk of heart failure deaths in some  
10 rural areas within the western part of Stratford-on-Avon, lower than can be explained  
11 by our model.  
12

13  
14  
15  
16  
17  
18  
19 A possible hypothesis based on these observations is that there is an additional factor  
20 influencing the morbidity and mortality of heart failure not looked at in this study, namely the  
21 urban/rural nature of a patient's living environment. It could be the case that living in an  
22 urban environment contributed risk and living in a rural area provided protection against heart  
23 failure morbidity and mortality. This would be an effect in *addition* to any increase in air  
24 pollution or social deprivation within urban settings compared to rural settings. This could  
25 certainly in principle be plausible, with people in rural areas perhaps doing more physical  
26 activity, eating more healthily etc. If this were the case it would explain the excess deaths in  
27 urban centres found in this study. It could also be responsible for the unexpected protective  
28 factor attributed to particulate matter air pollution in our analysis. Given that the particulate  
29 matter component of air pollution is *relatively* higher than the other components in rural  
30 areas, the protection that living in rural areas affords individuals could be misleadingly  
31 attributed (in our statistical analysis) to the particulate matter component of air pollution  
32 present in these areas. Further work will need to be done looking into this possible link  
33 between urban/rural living environments and heart failure morbidity and mortality. It could be  
34 very revealing to carefully characterise this effect if it indeed exists, as it may be an indication  
35 of unrecognised cardiovascular risk/protective factors associated with urban/rural living that  
36 exists within Warwickshire.  
37  
38  
39  
40  
41  
42  
43  
44  
45  
46  
47  
48  
49  
50  
51  
52  
53  
54  
55  
56  
57  
58  
59  
60

1 However, it is also important to bear in mind that this is an ecological study and all the  
2 relationships picked up between variables in this study have been found using aggregate data  
3 at the ward level (number over 50 years of age, average IMD score, average air pollution  
4 across ward, overall numbers of deaths and hospital admissions due to heart failure). It is not  
5 always a trivial task to extrapolate the conclusions drawn from such a study down to the level  
6 of individuals. Such a task would involve drilling down to individual level data and repeating  
7 the analysis, a task that was beyond the scope of this particular study. It is certainly possible  
8 that the unexpected negative correlation between particulate matter air pollution and heart  
9 failure could disappear when data is analysed at the individual level – an example of an  
10 ecological fallacy. Consequently it would be prudent to regard the results from the individual  
11 components of air pollution with cautious interest, rather than viewing them as proof of any  
12 real effects.  
13  
14  
15  
16  
17  
18  
19  
20  
21  
22  
23  
24  
25  
26

27 However, despite these caveats, this study has been able to provide some helpful information  
28 at the population level worthy of consideration. A health inequality has been revealed, and the  
29 manner with which this inequality is influenced by age, social deprivation, and the combined  
30 index of air pollution has been demonstrated. Such information should help inform policy  
31 decisions that would influence society at a population level and hopefully improve public  
32 health in the long run.  
33  
34  
35  
36  
37  
38  
39  
40  
41  
42

43 There are some limitations in this study worth considering that result from assumptions made  
44 along the way. A single air pollution measurement in 2010 was used and it was assumed that  
45 there was no significant change in this value over the 2005-2013 periods that mortality and  
46 hospital admission data was gathered from. The resulting cross-sectional nature of the study  
47 does not allow establishing temporality and thus causality of the observed associations. There  
48 was also no way to determine the length of time that individual members of the population  
49 within a ward had lived in that area, and thus how long they had been exposed to the  
50  
51  
52  
53  
54  
55  
56  
57  
58  
59  
60

1 measured ambient air pollution level. It was assumed that people with home addresses in a  
2 ward were exposed significantly to the levels of air pollution in that ward. Finally, as already  
3 mentioned, this was an ecological study, using aggregate data of risk factors to look for  
4 associations with aggregate data of morbidity and mortality. It is not always possible to apply  
5 such associations from a population level down to the individuals within that population.  
6  
7  
8  
9  
10  
11  
12  
13

14 In summary, this study has provided a number of interesting results. Firstly it has helped to  
15 quantify and map the inequality that exists across different parts of Warwickshire with  
16 regards to heart failure risk. It has also provided some interesting circumstantial evidence of a  
17 link between heart failure morbidity and air pollution. Finally it has also given a suggestion of  
18 a possible link between living in urban environments and a higher risk of cardiovascular  
19 disease, and a corresponding lower risk from living in rural environments. More work will  
20 need to be done to look into this particular possibility. It would be informative to run this type  
21 of analysis whilst factoring in the influence of a person's distance from their nearest urban  
22 centre. This urban/rural factor should be further explored and mined for additional  
23 information as it could be an indication of hitherto unconsidered factors influencing the health  
24 status of the population of Warwickshire and possibly further afield.  
25  
26  
27  
28  
29  
30  
31  
32  
33  
34  
35  
36  
37  
38

39 In order to determine the validity of our conclusions at the individual level further work  
40 would need to be done analysing the available data from individual patients (risks and  
41 outcomes). Such work could help to characterise the true effect of different components of air  
42 pollution at the individual level. It would also be interesting to determine if the different  
43 components of air pollution act as effect modifiers on each other.  
44  
45  
46  
47  
48  
49

50 It would be possible to look at the effects of air pollution variation in the shorter term as well.  
51 For example, looking at how local "spikes" in air pollution affect the rates of hospital  
52 admissions locally immediately following it. This could be done in Leamington Spa where  
53 there is an air quality monitoring station constantly measuring the levels of air pollutants.  
54  
55  
56  
57  
58  
59  
60

1 Other health problems, such as ischaemic heart disease and respiratory diseases, have been  
2  
3 linked with air pollution as well and it could be informative to also look into these links  
4  
5 locally.  
6  
7  
8  
9

10 **Contributorship statement:**

11  
12 OB conceived the idea, analyzed the data, contributed to formulating the results and wrote the  
13  
14 first draft. N-B K analyzed the data, advised on statistical aspects, contributed to formulating  
15  
16 the results, wrote the second draft. CJ analyzed the data. JL helped coordinate the project  
17  
18 and co-wrote the final draft; AC coordinated the project, advised on all aspects and co-wrote  
19  
20 the final draft.  
21  
22

23 **Funding:**

24  
25 *This paper presents independent research supported by the National Institute for Health*  
26  
27 *Research (NIHR) Collaborations for Leadership in Applied Health Research and Care West*  
28  
29 *Midlands. The views expressed are those of the author(s) and not necessarily those of the*  
30  
31 *NHS, the NIHR or the Department of Health.*  
32  
33

34 **Competing interests:** The authors declared no conflict of interest.  
35  
36

37 **Data sharing:** No additional data available  
38  
39  
40  
41  
42  
43  
44  
45  
46  
47  
48  
49  
50  
51  
52  
53  
54  
55  
56  
57  
58  
59  
60

## References

1. Particulate Air Pollution and Hospital Emergency Room Visits for Asthma in Seattle, Joel Schwartz, Daniel Slater, Timothy V. Larson, William E. Pierson, and Jane Q. Koenig. *American Review of Respiratory Disease*, Vol. 147, No. 4 (1993), pp. 826-831.
2. Global association of air pollution and heart failure: a systematic review and meta-analysis, Anoop SV Shah, Jeremy P Langrish, Harish Nair, David A McAllister, Amanda L Hunter, Prof Ken Donaldson, Prof David E Newby, Dr Nicholas L Mills. *The Lancet*, Early Online Publication, 10 July 2013  
DOI: 10.1016/S0140-6736(13)60898-3
3. Air pollution and lung cancer incidence in 17 European cohorts: prospective analyses from the European Study of Cohorts for Air Pollution Effects (ESCAPE), Raaschou-Nielsen O, Andersen ZJ, et al. *Lancet Oncol.* 2013 Aug;14(9):813-22
4. Cardiovascular Mortality and Long-Term Exposure to Particulate Air Pollution, Epidemiological Evidence of General Pathophysiological Pathways of Disease C. Arden Pope III, Richard T. Burnett, et al. *Circulation.* 2004; 109: 71-77
5. Air pollution and health, Bert Brunekreef, Stephen T Holgate, *The Lancet*, Volume 360, Issue 9341, 19 October 2002, Pages 1233–1242
6. Department of Environment, Food and Rural Affairs (DEFRA), department website, weblink (accessed 2/12/13):  
[http://aqma.defra.gov.uk/aqma/local\\_authorities.php?la\\_id=296](http://aqma.defra.gov.uk/aqma/local_authorities.php?la_id=296)
7. Epidemiology, pathophysiology, and etiology of congestive heart failure in older adults. Rich MW. *J Am Geriatr Soc.* 1997 Aug;45(8):968-74.
8. Influence of socioeconomic deprivation on the primary care burden and treatment of patients with a diagnosis of heart failure in general practice in Scotland: population based study. F A McAlister, N F Murphy, et al. *BMJ.* 2004 May 8; 328(7448): 1110.
9. Warwickshire Observatory website – ONS population estimates. Web link (accessed on 3/10/13):  
<http://www.warwickshireobservatory.org/observatorywcc.nsf/05a17cfbd3bcf85d802572920033cf0f/bfb8b0a1d34f274c802572c00048108f?OpenDocument>
10. Deprivation data produced by the Department for Communities and Local Government. File located at web link (accessed on 3/10/13):  
<https://www.gov.uk/government/publications/english-indices-of-deprivation-2010>  
Ward based population weighted averages calculated from LSOA specific data by the London Health Observatory and North East Public Health Observatory.
11. Fahrmeir L, Lang S. Bayesian Inference for Generalized Additive Mixed Models Based on Markov Random Field Priors. *Applied Statistics (JRSS C)*. 2001;50:201-20.
12. Kandala N-B, Tigbe W, Manda S, et al. Spatial Variation of Predictors of Hypertension in Sub-Saharan Africa: A Case Study of South-Africa. *American Journal of Hypertension* 2013. 10.1093/ajh/hps063.
13. Belitz C, Brezger A, Kneib T, et al. BayesX Software for Bayesian Inference in Structured Additive Regression Models Version 2.0.1, 2012. Accessed at:  
[http://www.stat.uni-muenchen.de/~bayesx/manual/methodology\\_manual.pdf](http://www.stat.uni-muenchen.de/~bayesx/manual/methodology_manual.pdf)
14. Taken from the Warwickshire Observatory Quality of Life in Warwickshire 2012/13 report. Weblink (accessed on 3/10/13):  
[http://maps.warwickshire.gov.uk/iareports/environmental\\_issues/](http://maps.warwickshire.gov.uk/iareports/environmental_issues/)

## Figure legends

**Figure 1 :** Warwickshire map with 2010 air quality index (all components of air pollution combined) displayed by ward (left; Warwickshire map with number of heart failure hospital admissions per 1000 population between 2005 – 2013 displayed by ward(centre) and Warwickshire map with total heart failure deaths per 1000 population between 2007 – 2012 displayed by ward(right).

[FIGURE 1 ABOUT HERE]

**Figure 2:** Left: Unadjusted total residual spatial effects of morbidity risk associated with heart failure, at ward level in Warwickshire. Shown are the posterior means. Right: Corresponding posterior probabilities at 80% nominal level.

[FIGURE 2 ABOUT HERE]

*Red coloured – high risk*  
*Green coloured – low risk*

*Black coloured – significant positive spatial effect*  
*White coloured- significant negative spatial effect*  
*Grey coloured – no significant effect*

**Figure 3:** Left: Total residual spatial effects of morbidity risk associated with heart failure, at ward level in Warwickshire. Shown are the posterior means of the full model (IMD 2010, Over 50, and the 4 indicators of air pollution). Right: Corresponding posterior probabilities at 80% nominal level.

[FIGURE 3 ABOUT HERE]

*Red coloured – high risk*  
*Green coloured – low risk*

*Black coloured – significant positive spatial effect*  
*White coloured- significant negative spatial effect*  
*Grey coloured – no significant effect*

**Figure 4:** Left: Unadjusted total residual spatial effects of mortality risk associated with heart failure, at ward level in Warwickshire. Shown are the posterior means. Right: Corresponding posterior probabilities at 80% nominal level.

[FIGURE 4 ABOUT HERE]

*Red coloured – high risk*  
*Green coloured – low risk*

*Black coloured – significant positive spatial effect*  
*White coloured- significant negative spatial effect*  
*Grey coloured – no significant effect*

**Figure 5:** Left: Total residual spatial effects of mortality risk associated with heart failure, at ward level in Warwickshire. Shown are the posterior means of the full model (IMD 2010, Over 50, and the 4 indicators of air pollution). Right: Corresponding posterior probabilities at 80% nominal level.

[FIGURE 5 ABOUT HERE]

*Red coloured – high risk*  
*Green coloured – low risk*

*Black coloured – significant positive spatial effect*  
*White coloured- significant negative spatial effect*  
*Grey coloured – no significant effect*

**Figure 6 –** Warwickshire map displaying the 2010 levels of deprivation (expressed as Multiple Deprivation Scores) by LSOAs. Produced by the Warwickshire Observatory (left) and Warwickshire map displaying the 2008 midyear estimates of % of people over the age of 50 by SOA. Produced by the Warwickshire Observatory (right).



**Table 1: Posterior mean (PM) of fixed effects estimates of heart failure admission and mortality across air pollutions indicators (Warwickshire 2005-2013)**

| Variable                         | Heart failure admission<br>PM & 95%CI <sup>‡</sup> | Heart failure mortality<br>PM & 95%CI <sup>†</sup> |
|----------------------------------|----------------------------------------------------|----------------------------------------------------|
| Constant                         | 6.19 (3.84, 8.97)                                  | 4.13 (1.18, 7.43)                                  |
| Nitrogen dioxide indicator (No2) | 3.35 (1.89, 4.99)                                  | 4.30 (1.68, 7.37)                                  |
| Sulphur dioxide indicator (So2)) | 7.75 (-3.84, 17.99)                                | 11.02 (-1.21, 22.41)                               |
| Particulates indicator (Pm)      | -12.93 (-20.41, -6.54)                             | -14.69 (-23.46, -6.50)                             |
| Benzene indicator (Ben)          | [31.9:8.36, 55.85]                                 | 25.98 (-6.62, 54.22)                               |
| Over 50 years %                  | 0.70(-0.63, 1.98)                                  | 1.60, (0.47, 2.92)                                 |
| IMD 2010 score                   | 0.02 ( 0.01, 0.03)                                 | 0.00 (-0.01, 0.01)                                 |

<sup>‡</sup> Spatially adjusted posterior mean (PM) from Bayesian geo-additive regression models after controlling for fixed effect of all air pollutions indicators: Mono-nitrogen Oxide (NOx), sulphur dioxide (So2), particulate matter (Pm), benzene (Ben) and combined index and the county of residence (spatial effects). <sup>†</sup> Spatially adjusted posterior mean (PM) from Bayesian geo-additive regression models after controlling for fixed effect of all air pollutions indicators: Mono-nitrogen Oxide (NOx), sulphur dioxide (So2), particulate matter (Pm), benzene (Ben) and combined index and the county of residence (spatial effects).

1  
2  
3 **Spatial variation of Heart Failure and Air Pollution in Warwickshire, UK:**  
4 **An investigation of small scale variation at the ward-level**  
5  
6

7 *Oscar Bennett MB BChir<sup>1</sup>, Ngianga-Bakwin Kandala PhD<sup>2,3</sup>, Chen Ji PhD<sup>2</sup>, John Linnane*  
8 *MD FFPHM<sup>1</sup>, Aileen Clarke MD PhD<sup>2</sup>*  
9

10  
11  
12 <sup>1</sup> Public Health Warwickshire, Communities Group, Warwickshire County Council ,Shire  
13 Hall, Barrack Street, Warwick, CV34 4RL, UK.

14 <sup>2</sup> Division of Health Sciences, University of Warwick Medical School, Coventry, CV4 7AL,  
15 UK.

16 <sup>3</sup> Division of Epidemiology and Biostatistics, School of Public Health, University of  
17 Witwatersrand, Johannesburg , South Africa.  
18  
19

20  
21  
22  
23 **Running title:** Heart Failure and Air Pollution in Warwickshire  
24

25  
26 **Keywords:** Warwickshire, Heart Failure, Air Pollution, epidemiology, spatial analyses  
27  
28

29  
30 **Correspondence to:**

31 Ngianga-Bakwin Kandala, PhD  
32 Division of Health Sciences  
33 University of Warwick Medical School  
34 Medical School Building  
35 Gibbet Hill Campus  
36 Coventry CV4 7AL  
37 United Kingdom  
38 Tel: + 44 (0) 2476150541  
39 Fax: + 44 (0) 2476528375  
40 Email: N-B.Kandala@[warwick.ac.uk](mailto:N-B.Kandala@warwick.ac.uk)  
41  
42  
43  
44  
45  
46  
47  
48  
49  
50  
51  
52  
53  
54  
55  
56  
57  
58  
59  
60

## Abstract

**Objectives:** To spatially map the morbidity and mortality caused by heart failure within Warwickshire to characterise and quantify any influence of air pollution on these risks.

**Design:** Cross-sectional.

**Setting:** Warwickshire, **United Kingdom**

**Participants:** Data from all of the 105 current Warwickshire County wards were collected on **hospital** admissions and deaths **due to** heart failure.

### Results

In multivariate analyses, the presence of a higher NO<sub>x</sub> in a ward [3.35:1.89, 4.99], Ben [31.9:8.36, 55.85] and IMD [0.02: 0.01, 0.03], were consistently associated with a higher risk of heart failure morbidity. Pm [-12.93:-20.41, -6.54] was negatively associated with the risk of heart failure morbidity. **No association was found between So<sub>2</sub> and heart failure morbidity.** The risk of heart failure mortality was higher in wards with a higher NO<sub>x</sub> [4.30:1.68, 7.37] and wards with more inhabitants 50+ years old [1.60: 0.47, 2.92]. Pm was negatively associated [-14.69: -23.46, -6.50] with heart failure mortality. So<sub>2</sub>, Ben, and IMD score were not associated with heart failure mortality.

There was a **prominent** variation in heart failure morbidity and mortality risk across wards, the highest risk being in the regions around Nuneaton and Bedworth.

### Conclusion

This study showed distinct spatial patterns in heart failure morbidity and mortality, suggesting the potential role of environmental factors beyond individual-level risk factors. Air pollution levels should therefore be taken into account when considering the wider determinants of public health and the impact that changes in air pollution might have on the health of a population.

## ARTICLE FOCUS

- Air pollution has been linked to the development and exacerbation of a number of health problems including cardiovascular diseases such as heart failure.
- Heart failure is a serious condition that unfortunately affects many people in the UK. This link seems especially clear for cardiovascular and respiratory diseases such as ischaemic heart disease, heart failure, asthma, influenza, and lung cancer
- It is well established that the ambient levels of air pollution in a region can have an impact on the health status of the population which inhabits it

## KEY MESSAGES

1. Using a novel approach, this study has characterised and quantified the potential role of environmental factors (air pollutants) at the county-level.
2. The presence of a higher Mono-nitrogen Oxide (NO<sub>x</sub>) in a ward, benzene and poor Index of Multiple Deprivation (IMD) score were consistently associated with a higher risk of heart failure morbidity. Particulate matter (Pm) was negatively associated with the risk of heart failure morbidity.
3. The risk of heart failure mortality was higher in wards with a higher NO<sub>x</sub> and wards with more inhabitants 50+ years old. Pm was negatively associated with heart failure mortality.
4. Air pollution overall, when all pollution components were brought together into a combined index, was positively associated with both heart failure morbidity and mortality across Warwickshire.
5. There was a striking variation in heart failure morbidity and mortality risk across wards, the highest risk being in the regions around Nuneaton and Bedworth.

## STRENGTHS AND LIMITATIONS

- The model employed a fully Bayesian approach using Markov Chain Monte Carlo (MCMC) techniques for inference and model checking<sup>(11,12)</sup>
- A single air pollution measurement in 2010 was used and it was assumed that there was no significant change in this value over the 2005-2013 periods that mortality and hospital admission data was gathered from.
- The cross-sectional nature of the study unfortunately does not allow us to establish temporality and thus clearly demonstrate causality of the observed associations.
- This was an ecological study, analysing characteristics and risk at the ward rather than individual level. Consequently associations and conclusions found from the aggregate data may not be directly applicable to individuals.

## Introduction

Air pollution has been linked to the development and exacerbation of a number of health problems. This link seems especially clear for cardiovascular and respiratory diseases such as ischaemic heart disease, heart failure, asthma, influenza, and lung cancer<sup>(1, 2, 3, 4)</sup>. It is well established that the ambient levels of air pollution in a region can have an impact on the health status of the population which inhabits it<sup>(5)</sup>. Air pollution levels should therefore be taken into account when considering the wider determinants of public health and the impact that changes in air pollution might have on the health of a population.

Warwickshire is an English county within the United Kingdom approximately 70 miles North-West of London. The issue of air pollution has been highlighted in Warwickshire recently by the setting up of Air Quality Management Areas (AQMAs) in a number of different parts of the county. These are specific areas in the county that have been identified as places where, without a focused local council strategy to reduce air pollution, future government targets for air pollutant concentrations may not be met. Within Warwickshire the specific air pollutant that has been identified as a problem and led to these special areas being setup is mono-nitrogen oxides (NO<sub>x</sub>)<sup>(6)</sup>.

The objective of the present study was therefore to look for any relationship between levels of air pollution and the morbidity and mortality associated with heart failure within Warwickshire in the last few years (2005-2013 for morbidity, 2007-2012 for mortality). We examined a range of traditional air pollutants for an ecological association with heart failure morbidity and mortality at the county level. Furthermore, the present analysis attempted to highlight spatial patterns in heart failure morbidity and mortality risk within the county, after multiple adjustments for proximate, county-level factors. The geographic locations of wards within the county can be considered as proxy measures of many other unmeasured factors such as availability and access to health services, individual health seeking behaviour,

1 preventive ward policy and general ward factors. Such estimates might illustrate how much  
2  
3 can be learned by detailed exploratory analyses as well as how these data can be used to  
4  
5 strategically inform policy aiming at the prevention and management of serious conditions  
6  
7 such as heart failure in these settings.  
8  
9

### 10 11 12 **The evidence from published literature for the link between air pollution and health** 13 **problems** 14 15

16  
17 Studies have shown an effect on the health of populations caused by both long term exposure  
18  
19 as well as short term “spikes” in local air pollution levels<sup>(5)</sup>.  
20

21 A relevant systematic review and meta-analysis has been published recently in the Lancet<sup>(2)</sup>.  
22

23 It pooled the results of studies that have been conducted worldwide looking at the temporal  
24  
25 relationship between the levels of a number of different air pollutants with local heart failure  
26  
27 hospital admission rates and mortality rates. This showed a clear link between short term rises  
28  
29 in all types of air pollution (except ozone) and rises in hospital admissions and mortality due  
30  
31 to heart failure. This study did not look at any potential effects from long term exposure to air  
32  
33 pollution. However it did provide strong evidence that air pollution can ‘exacerbate’ heart  
34  
35 failure, increasing the likelihood that a patient with existing heart failure will become  
36  
37 sufficiently unwell to require hospital admission, or even die.  
38  
39

40  
41 The ESCAPE study<sup>(3)</sup>, published recently in the Lancet Oncology, pooling the results of 17  
42  
43 cohort studies from around Europe looked at the ambient levels of air pollution in an area  
44  
45 (particulate matter and NO<sub>x</sub>) and the incidence of lung cancers in the inhabitants of this area  
46  
47 during many years of follow up (mean 12.8 years). This was intended to look at the risk  
48  
49 associated with long term exposure to air pollution. A statistically significant correlation was  
50  
51 found between the levels of particulate matter air pollution and the local incidence of lung  
52  
53 cancer diagnoses. Particulate matter with a diameter of less than 10 µm had a hazard ratio of  
54  
55 1.22 [95% CI 1.03-1.45] per (10 µg/cubic meter). In other words, for every increase in  
56  
57  
58  
59  
60

1 particulate matter pollution of 10 µg/cubic meter there was a corresponding immediate  
2  
3 increase in the chance of being diagnosed with lung cancer of 22% (95% CI 3% - 45%).  
4  
5 There was also a correlation between traffic volume within 100m of a residence and a modest  
6  
7 increase in the rate of lung cancer (Hazard ratio 1.09 (CI 0.99-1.21)). No similar correlation  
8  
9 was found with NO<sub>x</sub> air pollution. This suggests that long term exposure to higher levels of  
10  
11 particulate matter air pollution may increase the incidence of lung cancer in a population.  
12  
13  
14 Another study published in the United States in 2004 looked at the long term effect of  
15  
16 exposure to particulate matter air pollution and the mortality attributed to different  
17  
18 cardiovascular and respiratory diseases in different areas of the United States<sup>(4)</sup>. A good  
19  
20 correlation was found between the degree of long term exposure to particulate matter air  
21  
22 pollution and increases in mortality from cardiovascular diseases, including heart failure.  
23  
24 Interestingly this was not found to be the case for most respiratory diseases. There was also an  
25  
26 element of the study that looked at the effect of a person's smoking status on the mortality  
27  
28 statistics. This found, as expected, a strong link between mortality and smoking. However it  
29  
30 also found that air pollution contributed **additional** cardiovascular mortality **risk on top of** that  
31  
32 attributed to smoking. **This was at least an** additive, if not a synergistic **effect**.  
33  
34  
35  
36  
37  
38

## 39 **Methods**

### 40 *Study data*

41  
42 In order to carry out this project, data was collected about the geographical distribution of air  
43  
44 pollution within Warwickshire. This data included information about each of four individual  
45  
46 components of air pollution (NO<sub>x</sub>, sulphur dioxide, particulate matter, and benzene) which  
47  
48 could then be united into a combined index (all of the contributions added together). A single  
49  
50 recorded level from 2010 of each air pollutant for each ward was used in the study. This was  
51  
52 then compared to collected data about:  
53  
54  
55  
56  
57  
58  
59  
60

- 1 (i) The geographical distribution of home addresses of patients who were admitted to  
2 hospital because of heart failure or a complication of heart failure. Hospital  
3 admission rate in an area due to heart failure was used as a proxy indicator for the  
4 level of heart failure morbidity within that area.  
5  
6 (ii) The geographical distribution of home addresses of patients who died from heart  
7 failure, or whose death was contributed to by heart failure.  
8  
9

10 These data were collected by the Warwickshire Observatory, which is part of the  
11 Warwickshire County Council in charge of collecting and handling statistics relating to the  
12 county. Mortality data for the analysis was supplied via the Warwickshire Public Health  
13 Intelligence Team and was sourced from the Public Health Mortality Files, Office for  
14 National Statistics. Hospital admissions data was accessed via the Ventris Business  
15 Intelligence System, Arden Commissioning Support Unit."  
16  
17  
18  
19  
20  
21  
22  
23  
24  
25  
26  
27  
28  
29  
30

31 Ward level population data were obtained from the 2011 census. Warwickshire is divided into  
32 105 wards. Data from all of the 105 current Warwickshire County wards were collected.  
33

34 The potential confounding variables of firstly age structure of a population within a ward and  
35 secondly levels of social deprivation within a ward were identified<sup>(7,8)</sup>. These were then  
36 controlled for in the second stage of the statistical analysis (see below).  
37  
38  
39

40 Information about the age structure of wards was obtained from the Office of National  
41 Statistics mid 2010 estimates (obtained from the Warwickshire Observatory website)<sup>(9)</sup>. The  
42 representative statistical value of “percentage (%) of population above age 50” was used as an  
43 indicator of wards with a higher proportion of older people.  
44  
45  
46  
47  
48  
49

50 Information about social deprivation was obtained from the English Indices of Deprivation  
51 published by the Department for Communities and Local Government<sup>(10)</sup>. The Index of  
52 Multiple Deprivation (IMD) averaged across each ward was used as an indicator of the level  
53 of deprivation within the wards of Warwickshire.  
54  
55  
56  
57  
58  
59  
60



The information on crude observed air pollution level distribution, heart failure hospital admission rates and mortality rates were then represented on maps of Warwickshire (Figure 1).

### Statistical Analysis

To account for spatial autocorrelation in observed heart failure hospital admission and mortality rates at the ward level, in Warwickshire, we applied a unified approach to account for possible air pollution effects of environmental risk factors. This was achieved using a geo-additive semi-parametric mixed model. The model employed a fully Bayesian approach using Markov Chain Monte Carlo (MCMC) techniques for inference and model checking<sup>(11, 12)</sup>. Response variables were defined as the count (per 1000 population) of heart failure morbidity or mortality in a ward (Poisson model):  $y_i / \eta_i, \delta \sim B(\eta_i, \delta)$  for a binomial formulation.

(Poisson model):  $y_i / \eta_i, \delta \sim B(\eta_i, \delta)$  (1) for a binomial formulation and a geo-additive semi-parametric predictor  $\mu_i = h(\eta_i)$ :

$$\eta_i = f_1(x_{i1}) + \dots + f_p(x_{ip}) + f_{spat}(s_i) + \mathcal{E}_i \quad (2)$$

where  $h$  is a known response function with a poisson link function,  $f_1, \dots, f_p$  are non-linear smoothed effects of the metrical covariates (time in years), and  $f_{spat}(s_i)$  is the effect of the spatial covariate  $s_i \in \{1, \dots, S\}$  labelling the ward in Warwickshire. Regression models with predictors such as those in equation 2 are sometimes referred to as geo-additive models. P-spline priors were assigned to the functions  $f_1, \dots, f_p$ , and a Markov random field prior was used for  $f_{spat}(s_i)$ . More detailed information about the modelling approach can be found elsewhere<sup>(11, 13)</sup>. The standard measure of effect was the posterior mean (PM) and 95% credible region (CR).

The analysis was carried out using version 2.0.1 of the BayesX software package, which permits Bayesian inference based on MCMC simulation techniques<sup>(13)</sup>. Multivariate Bayesian geo-additive regression models were used to evaluate the significance of the posterior mean

1 (PM) determined for the fixed effects and spatial effects between air pollution and the  
2 morbidity and mortality from heart failure within Warwickshire. Each component of air  
3 pollution was looked at separately and then also the combined index in unadjusted models.  
4  
5  
6  
7  
8 Next, fully adjusted multivariate Bayesian geo-additive regressions analysis were performed  
9  
10 to look again for statistically significant correlation between these variables, but this time  
11  
12 further controlling for any influence from age structure or social deprivation.  
13

## 14 15 16 17 **Results**

18  
19 **Figure 1 and Figure 6** display the observed data collected for this study on maps using  
20  
21 graduated colouring to represent data value categories within each ward.  
22  
23

### 24 25 26 *Observed Air Quality Map*

27  
28 **Figure 1left** was produced using 2010 data from the Warwickshire Observatory. It is based  
29  
30 on a combined air quality indicator which is a combination of information about the  
31  
32 contribution to air pollution from NO<sub>x</sub>, sulphur dioxide, particulate matter, and benzene. The  
33  
34 Warwickshire Observatory description of this index reads as follows:  
35

36  
37 “Combined Air Quality Indicator (estimates of emissions for four pollutants: benzene,  
38  
39 nitrogen dioxide, sulphur dioxide and particulates) for small areas (modelled to 1 km grid  
40  
41 squares) where an index value of 1 is equivalent to the national standard for each pollutant.  
42  
43 The values are then summed so an overall score of 4 would represent all four pollutants being  
44  
45 present at the national standard level.”<sup>(14)</sup> These specific standards are described in the Air  
46  
47 Quality Standards Regulations 2010.  
48  
49

50  
51 The geographical pattern of the observed air pollution across the county shows a higher level  
52  
53 of air pollution near the more urban centres of Birmingham and Coventry. The proximity of  
54  
55 parts of the county to motorways such as the M6 and M42 could also be a contributing factor  
56  
57  
58  
59  
60

1 to the observed pattern. There was no place in the county where the level of any pollutant  
2 exceeded the national standard in 2010.  
3  
4

5  
6  
7 *Heart Failure Hospital Admission Map*

8  
9 **Figure 1centre** shows the geographical distribution of the **density of** home addresses of  
10 patients admitted to hospital with a diagnosis of heart failure (or exacerbation of heart failure)  
11 within the April 2005- April 2013 period.  
12  
13  
14

15  
16  
17  
18 *Heart Failure Mortality Map*

19  
20 **Figure 1right** shows the geographical distribution of the **density of** home addresses of  
21 patients who died either directly or in part from heart failure in the 2007-2012 (inclusive)  
22 periods.  
23  
24  
25  
26  
27  
28  
29

30 **Table 1** (left panel) displays posterior means of heart failure admission across the selected  
31 covariates following multivariate Bayesian geo-additive regression analyses.  
32  
33

34 The Posterior mean (PM) & 95% Credible Region (CR) of overall hospital admission rates  
35 due to heart failure and mortality rates from heart failure were [6.19 (3.84, 8.97)] and [4.13  
36 (1.18, 7.43)] (Table 2) respectively. On average, the presence of a higher Mono-nitrogen  
37 oxide indicator (NO<sub>x</sub>) in a ward [Posterior mean (PM) & 95% Credible Region (CR): 3.35  
38 (1.89, 4.99)], Benzene indicator (Ben) [31.9 (8.36, 55.85)] and IMD 2010 score [0.02 (0.01,  
39 0.03)], were consistently associated with higher risk of heart failure morbidity. The  
40 particulates indicator (Pm) [-12.93 (-20.41, -6.54)] was negatively associated with the risk of  
41 heart failure morbidity. Sulphur dioxide indicator (So<sub>2</sub>) was not associated with heart failure  
42 morbidity.  
43  
44  
45  
46  
47  
48  
49  
50  
51  
52  
53  
54  
55  
56  
57  
58  
59  
60

1 **Table 1** (right panel) shows the same corresponding results for heart failure mortality. This  
2  
3 table shows that the risk of heart failure mortality was higher in wards with a higher Mono-  
4  
5 nitrogen oxide indicator (NOx) [4.30 (1.68, 7.37)] and wards with more inhabitants over 50  
6  
7 years old [1.60 (0.47, 2.92)]. The particulates indicator (Pm) was negatively associated with  
8  
9 heart failure mortality. The sulphur dioxide indicator (So2), Benzene indicator (Ben), and  
10  
11 IMD score were not associated with heart failure mortality.  
12  
13

14  
15  
16  
17 The combined air pollution index (all indicators averaged together) when incorporated into a  
18  
19 separate model combining age and social deprivation was significantly positively associated  
20  
21 with both heart failure morbidity [1.39 (0.87, 1.81)] and mortality [1.79 (0.85, 2.55)] across  
22  
23 the county.  
24  
25

26  
27 In **Figure 2** and **Figure 4**, the left-hand maps show the unadjusted estimates of posterior total  
28  
29 residual ward means of heart failure morbidity and mortality **respectively**. In **Figure 3** and  
30  
31 **Figure 5**, the left-hand maps show the adjusted PM after multiple adjustment for the  
32  
33 geographical location, taking into account the auto-correlation structure in the data, the  
34  
35 uncertainty in the ward level and all ward-level risk factors (**air pollution components, age,**  
36  
37 **social deprivation**) for heart failure morbidity and mortality **respectively**. The red colour  
38  
39 indicates the maximum posterior mean recorded while green denotes the lowest mean. The  
40  
41 right-hand maps in **Figures 2, 3, 4 and 5** show the 95% posterior probability of heart failure  
42  
43 and mortality, which indicate the statistical significance associated with the total excess risk.  
44  
45 Black colour indicates a negative spatial effect (associated with increased risk of heart failure  
46  
47 and mortality), white colour a positive effect (a decreased risk) and grey colour a non-  
48  
49 significant effect.  
50  
51  
52

53  
54  
55 In general, there was consistently higher heart failure morbidity risk in northern wards  
56  
57 particularly around Nuneaton and Bedworth and lower heart failure morbidity risks in the  
58  
59  
60

1 southern wards particularly within the district of Stratford-on-Avon. However, all this  
2 variation could **partially** be accounted for within the model generated within this study (taking  
3 into account air pollution, age, and social deprivation levels).  
4  
5  
6  
7

8 **Heart** failure mortality risk was, **in general**, higher in northern wards around Nuneaton and  
9 Bedworth as well as in some central areas around Warwick, Royal Leamington Spa, and  
10 Kenilworth. Heart failure mortality risk was again lower in more southern wards particularly  
11 within Stratford-on-Avon. Unlike with morbidity however, our model could not explain all  
12 this variation in heart failure mortality. Even after taking into account air pollution, age, and  
13 social deprivation the rate of death from heart failure remained significantly higher than  
14 would be expected in areas within and around Nuneaton, Bedworth, Warwick, Royal  
15 Leamington Spa, and Kenilworth.  
16  
17  
18  
19  
20  
21  
22  
23  
24  
25

26  
27 In sensitivity analyses, we tested several models and our results were not substantially altered  
28 after removing one or two pollutant (data not shown).  
29  
30  
31  
32  
33  
34

## 35 **Discussion**

36  
37  
38 Before even considering air pollution, this study helps to demonstrate the inequality **of** risk  
39 from heart failure disease and death that exists for individuals living in different parts of the  
40 county of Warwickshire. There is a significant excess risk of both disease and death in more  
41 northern wards within and surrounding Nuneaton and Bedworth. Much (but not all) of this  
42 **variation** could be attributed to the air pollution, **age structure and** social deprivation that  
43 exists in these areas according to our model. Measures that seek to address air pollution and  
44 social deprivation could be expected therefore to help mitigate against cardiovascular risks  
45 within these local populations.  
46  
47  
48  
49  
50  
51  
52  
53  
54  
55  
56  
57  
58  
59  
60

1 The present study corroborates the notion that air pollution is an increasingly important public  
2 health issue in Warwickshire. Higher levels of the average air pollution index looked at in this  
3 study correlated significantly with increased levels of both heart failure morbidity and  
4 mortality across the county, even after removing the effects of age structure and social  
5 deprivation. The individual component of NO<sub>x</sub> air pollution seems particularly to contribute  
6 risk to both the morbidity and mortality of heart failure within the county, suggesting that it  
7 may have a particularly detrimental effect on heart failure patients. This reinforces the  
8 importance of the AQMAs set up within the county in response to high NO<sub>x</sub> levels. Road  
9 traffic is a large contributor to air pollution within Warwickshire. Diesel engines are  
10 responsible for a large part of the NO<sub>x</sub> component of these emissions.

11 An unexpected result also appeared within our analysis. Particulate matter air pollution  
12 became significantly, negatively correlated with both heart failure morbidity and mortality  
13 when incorporated into our model with all risk factors taken into account and controlled for in  
14 this study. This would imply some sort of unexpected “protective influence” from particulate  
15 matter air pollution on heart failure patients. This clearly contradicts our expectations and is at  
16 odds with a wealth of existing evidence that indicates that particulate matter air pollution  
17 contributes risk to and exacerbates cardiovascular disease<sup>(4)</sup>.

18 We offer a possible explanation for this based on the following four observations:

- 19 1. The above-mentioned negative correlation of particulate matter air pollution with heart  
20 failure morbidity and mortality in our model.
- 21 2. Particulate matter air pollution actually varied very little across the county compared  
22 to the other types of air pollution. All types of air pollution tended to decrease in rural  
23 areas, but particulate matter tended to decrease much less compared to the other  
24 components of air pollution. Consequently in rural areas of the county where most

1 types of air pollution are significantly lower, particulate matter pollution was  
2 relatively higher compared to NOx, Benzene, and SO2.  
3  
4

- 5  
6 3. There seems to be a high risk of heart failure deaths in urban centres (particularly  
7 Nuneaton, Bedworth, Warwick, Royal Leamington Spa, and Kenilworth), higher than  
8 can be explained by our model.  
9  
10  
11  
12 4. Conversely, there seems to be a particularly low risk of heart failure deaths in some  
13 rural areas within the western part of Stratford-on-Avon, lower than can be explained  
14 by our model.  
15  
16  
17

18  
19 A possible hypothesis based on these observations is that there is an additional factor  
20 influencing the morbidity and mortality of heart failure not looked at in this study, namely the  
21 urban/rural nature of a patient's living environment. It could be the case that living in an  
22 urban environment contributed risk and living in a rural area provided protection against heart  
23 failure morbidity and mortality. This would be an effect in *addition* to any increase in air  
24 pollution or social deprivation within urban settings compared to rural settings. This could  
25 certainly in principle be plausible, with people in rural areas perhaps doing more physical  
26 activity, eating more healthily etc. If this were the case it would explain the excess deaths in  
27 urban centres found in this study. It could also be responsible for the unexpected protective  
28 factor attributed to particulate matter air pollution in our analysis. Given that the particulate  
29 matter component of air pollution is *relatively* higher than the other components in rural  
30 areas, the protection that living in rural areas affords individuals could be misleadingly  
31 attributed (*in our statistical analysis*) to the particulate matter component of air pollution  
32 present in these areas. Further work will need to be done looking into this possible link  
33 between urban/rural living environments and heart failure morbidity and mortality. It could be  
34 very revealing to carefully characterise this effect if it indeed exists, as it may be an indication  
35 of unrecognised cardiovascular risk/protective factors associated with urban/rural living that  
36 exists within Warwickshire.  
37  
38  
39  
40  
41  
42  
43  
44  
45  
46  
47  
48  
49  
50  
51  
52  
53  
54  
55  
56  
57  
58  
59  
60

1 However, it is also important to bear in mind that this is an ecological study and all the  
2 relationships picked up between variables in this study have been found using aggregate data  
3 at the ward level (number over 50 years of age, average IMD score, average air pollution  
4 across ward, overall numbers of deaths and hospital admissions due to heart failure). It is not  
5 always a trivial task to extrapolate the conclusions drawn from such a study down to the level  
6 of individuals. Such a task would involve drilling down to individual level data and repeating  
7 the analysis, a task that was beyond the scope of this particular study. It is certainly possible  
8 that the unexpected negative correlation between particulate matter air pollution and heart  
9 failure could disappear when data is analysed at the individual level – an example of an  
10 ecological fallacy. Consequently it would be prudent to regard the results from the individual  
11 components of air pollution with cautious interest, rather than viewing them as proof of any  
12 real effects.  
13  
14  
15  
16  
17  
18  
19  
20  
21  
22  
23  
24  
25  
26

27 However, despite these caveats, this study has been able to provide some helpful information  
28 at the population level worthy of consideration. A health inequality has been revealed, and the  
29 manner with which this inequality is influenced by age, social deprivation, and the combined  
30 index of air pollution has been demonstrated. Such information should help inform policy  
31 decisions that would influence society at a population level and hopefully improve public  
32 health in the long run.  
33  
34  
35  
36  
37  
38  
39  
40  
41  
42

43 There are some limitations in this study worth considering that result from assumptions made  
44 along the way. A single air pollution measurement in 2010 was used and it was assumed that  
45 there was no significant change in this value over the 2005-2013 periods that mortality and  
46 hospital admission data was gathered from. The resulting cross-sectional nature of the study  
47 does not allow establishing temporality and thus causality of the observed associations. There  
48 was also no way to determine the length of time that individual members of the population  
49 within a ward had lived in that area, and thus how long they had been exposed to the  
50  
51  
52  
53  
54  
55  
56  
57  
58  
59  
60



1 measured ambient air pollution level. It was assumed that people with home addresses in a  
2 ward were exposed significantly to the levels of air pollution in that ward. Finally, as already  
3 mentioned, this was an ecological study, using aggregate data of risk factors to look for  
4 associations with aggregate data of morbidity and mortality. It is not always possible to apply  
5 such associations from a population level down to the individuals within that population.  
6  
7  
8  
9  
10  
11  
12  
13

14 In summary, this study has provided a number of interesting results. Firstly it has helped to  
15 quantify and map the inequality that exists across different parts of Warwickshire with  
16 regards to heart failure risk. It has also provided some interesting circumstantial evidence of a  
17 link between heart failure morbidity and air pollution. Finally it has also given a suggestion of  
18 a possible link between living in urban environments and a higher risk of cardiovascular  
19 disease, and a corresponding lower risk from living in rural environments. More work will  
20 need to be done to look into this particular possibility. It would be informative to run this type  
21 of analysis whilst factoring in the influence of a person's distance from their nearest urban  
22 centre. This urban/rural factor should be further explored and mined for additional  
23 information as it could be an indication of hitherto unconsidered factors influencing the health  
24 status of the population of Warwickshire and possibly further afield.  
25  
26  
27  
28  
29  
30  
31  
32  
33  
34  
35  
36  
37  
38

39 In order to determine the validity of our conclusions at the individual level further work  
40 would need to be done analysing the available data from individual patients (risks and  
41 outcomes). Such work could help to characterise the true effect of different components of air  
42 pollution at the individual level. It would also be interesting to determine if the different  
43 components of air pollution act as effect modifiers on each other.  
44  
45  
46  
47  
48  
49

50 It would be possible to look at the effects of air pollution variation in the shorter term as well.  
51 For example, looking at how local "spikes" in air pollution affect the rates of hospital  
52 admissions locally immediately following it. This could be done in Leamington Spa where  
53 there is an air quality monitoring station constantly measuring the levels of air pollutants.  
54  
55  
56  
57  
58  
59  
60

1 Other health problems, such as ischaemic heart disease and respiratory diseases, have been  
2  
3 linked with air pollution as well and it could be informative to also look into these links  
4  
5 locally.  
6  
7  
8  
9

#### 10 **Contributorship statement:**

11  
12 OB conceived the idea, analyzed the data, contributed to formulating the results and wrote the  
13  
14 first draft. N-B K analyzed the data, advised on statistical aspects, contributed to formulating  
15  
16 the results, wrote the second draft. CJ analyzed the data. JL helped coordinate the project  
17  
18 and co-wrote the final draft; AC coordinated the project, advised on all aspects and co-wrote  
19  
20 the final draft.  
21  
22

#### 23 **Funding:**

24  
25 *This paper presents independent research supported by the National Institute for Health*  
26  
27 *Research (NIHR) Collaborations for Leadership in Applied Health Research and Care West*  
28  
29 *Midlands. The views expressed are those of the author(s) and not necessarily those of the*  
30  
31 *NHS, the NIHR or the Department of Health.*  
32  
33

34  
35 **Competing interests:** The authors declared no conflict of interest.  
36

37 **Data sharing:** Not application  
38

#### 39 **References**

- 40  
41
- 42 1. Particulate Air Pollution and Hospital Emergency Room Visits for Asthma in Seattle,  
43 Joel Schwartz, Daniel Slater, Timothy V. Larson, William E. Pierson, and Jane Q.  
44 Koenig. American Review of Respiratory Disease, Vol. 147, No. 4 (1993), pp. 826-  
45 831.
  - 46 2. Global association of air pollution and heart failure: a systematic review and meta-  
47 analysis, Anoop SV Shah, Jeremy P Langrish, Harish Nair, David A McAllister,  
48 Amanda L Hunter, Prof Ken Donaldson, Prof David E Newby, Dr Nicholas L Mills.  
49 The Lancet, Early Online Publication, 10 July 2013  
50 DOI: 10.1016/S0140-6736(13)60898-3
  - 51 3. Air pollution and lung cancer incidence in 17 European cohorts: prospective analyses  
52 from the European Study of Cohorts for Air Pollution Effects (ESCAPE), Raaschou-  
53 Nielsen O, Andersen ZJ, et al. Lancet Oncol. 2013 Aug;14(9):813-22
  - 54 4. Cardiovascular Mortality and Long-Term Exposure to Particulate Air Pollution,  
55 Epidemiological Evidence of General Pathophysiological Pathways of Disease  
56 C. Arden Pope III, Richard T. Burnett, et al. Circulation. 2004; 109: 71-77  
57  
58  
59  
60

5. Air pollution and health, Bert Brunekreef, Stephen T Holgate, The Lancet, Volume 360, Issue 9341, 19 October 2002, Pages 1233–1242
6. Department of Environment, Food and Rural Affairs (DEFRA), department website, weblink (accessed 2/12/13):  
[http://aqma.defra.gov.uk/aqma/local\\_authorities.php?la\\_id=296](http://aqma.defra.gov.uk/aqma/local_authorities.php?la_id=296)
7. Epidemiology, pathophysiology, and etiology of congestive heart failure in older adults. Rich MW. J Am Geriatr Soc. 1997 Aug;45(8):968-74.
8. Influence of socioeconomic deprivation on the primary care burden and treatment of patients with a diagnosis of heart failure in general practice in Scotland: population based study. F A McAlister, N F Murphy, et al. BMJ. 2004 May 8; 328(7448): 1110.
9. Warwickshire Observatory website – ONS population estimates. Web link (accessed on 3/10/13):  
<http://www.warwickshireobservatory.org/observatory/observatorywcc.nsf/05a17cfbd3bcf85d802572920033cf0f/bfb8b0a1d34f274c802572c00048108f?OpenDocument>
10. Deprivation data produced by the Department for Communities and Local Government. File located at web link (accessed on 3/10/13):  
<https://www.gov.uk/government/publications/english-indices-of-deprivation-2010>  
Ward based population weighted averages calculated from LSOA specific data by the London Health Observatory and North East Public Health Observatory.
11. Fahrmeir L, Lang S. Bayesian Inference for Generalized Additive Mixed Models Based on Markov Random Field Priors. *Applied Statistics (JRSS C)*. 2001;50:201-20.
12. Kandala N-B, Tigbe W, Manda S, Stranges S. Spatial Variation of Predictors of Hypertension in Sub-Saharan Africa: A Case Study of South-Africa. *American Journal of Hypertension* 2013. 10.1093/ajh/hps063.
13. Belitz C, Brezger A, Kneib T, Lang S. BayesX Software for Bayesian Inference in Structured Additive Regression Models Version 2.0.1, 2012. Accessed at:  
[http://www.stat.uni-muenchen.de/~bayesx/manual/methodology\\_manual.pdf](http://www.stat.uni-muenchen.de/~bayesx/manual/methodology_manual.pdf)
14. Taken from the Warwickshire Observatory Quality of Life in Warwickshire 2012/13 report. Weblink (accessed on 3/10/13):  
[http://maps.warwickshire.gov.uk/iareports/environmental\\_issues/](http://maps.warwickshire.gov.uk/iareports/environmental_issues/)

### Author's contributions

OB conceived the idea, analyzed the data, contributed to formulating the results and wrote the first draft.

N-B K analyzed the data, advised on statistical aspects, contributed to formulating the results, wrote the second draft. CJ analyzed the data. JL helped coordinate the project and co-wrote the final draft; AC coordinated the project, advised on all aspects and co-wrote the final draft.

## Figure legends

**Figure 1** : Warwickshire map with 2010 air quality index (all components of air pollution combined) displayed by ward (left); Warwickshire map with number of heart failure hospital admissions per 1000 population between 2005 – 2013 displayed by ward(centre) and Warwickshire map with total heart failure deaths per 1000 population between 2007 – 2012 displayed by ward(right).

[FIGURE 1 ABOUT HERE]

**Figure 2:** Left: Unadjusted total residual spatial effects of morbidity risk associated with heart failure, at ward level in Warwickshire. **Shown are the posterior means.** Right: Corresponding posterior probabilities at 80% nominal level.

[FIGURE 2 ABOUT HERE]

*Red coloured – high risk*  
*Green coloured – low risk*

*Black coloured – significant positive spatial effect*  
*White coloured- significant negative spatial effect*  
*Grey coloured – no significant effect*

**Figure 3:** Left: Total residual spatial effects of morbidity risk associated with heart failure, at ward level in Warwickshire. **Shown are the posterior means of the full model (IMD 2010, Over 50, and the 4 indicators of air pollution).** Right: Corresponding posterior probabilities at 80% nominal level.

[FIGURE 3 ABOUT HERE]

*Red coloured – high risk*  
*Green coloured – low risk*

*Black coloured – significant positive spatial effect*  
*White coloured- significant negative spatial effect*  
*Grey coloured – no significant effect*

**Figure 4:** Left: Unadjusted total residual spatial effects of mortality risk associated with heart failure, at ward level in Warwickshire. **Shown are the posterior means.** Right: Corresponding posterior probabilities at 80% nominal level.

[FIGURE 4 ABOUT HERE]

*Red coloured – high risk*  
*Green coloured – low risk*

*Black coloured – significant positive spatial effect*  
*White coloured- significant negative spatial effect*  
*Grey coloured – no significant effect*

**Figure 5:** Left: Total residual spatial effects of mortality risk associated with heart failure, at ward level in Warwickshire. **Shown are the posterior means of the full model (IMD 2010, Over 50, and the 4 indicators of air pollution).** Right: Corresponding posterior probabilities at 80% nominal level.

[FIGURE 5 ABOUT HERE]

*Red coloured – high risk*  
*Green coloured – low risk*

*Black coloured – significant positive spatial effect*  
*White coloured- significant negative spatial effect*  
*Grey coloured – no significant effect*

**Figure 6** – Warwickshire map displaying the 2010 levels of deprivation (expressed as Multiple Deprivation Scores) by LSOAs. Produced by the Warwickshire Observatory (left) and Warwickshire map displaying the 2008 midyear estimates of % of people over the age of 50 by SOA. Produced by the Warwickshire Observatory (right).

**Table 1: Posterior mean (PM) of fixed effects estimates of heart failure admission and mortality across air pollutions indicators (Warwickshire 2005-2013)**

| Variable                         | Heart failure admission<br>PM & 95%CI <sup>‡</sup> | Heart failure mortality<br>PM & 95%CI <sup>†</sup> |
|----------------------------------|----------------------------------------------------|----------------------------------------------------|
| Constant                         | 6.19 (3.84, 8.97)                                  | 4.13 (1.18, 7.43)                                  |
| Nitrogen dioxide indicator (No2) | 3.35 (1.89, 4.99)                                  | 4.30 (1.68, 7.37)                                  |
| Sulphur dioxide indicator (So2)) | 7.75 (-3.84, 17.99)                                | 11.02 (-1.21, 22.41)                               |
| Particulates indicator (Pm)      | -12.93 (-20.41, -6.54)                             | -14.69 (-23.46, -6.50)                             |
| Benzene indicator (Ben)          | [31.9:8.36, 55.85]                                 | 25.98 (-6.62, 54.22)                               |
| Over 50 years %                  | 0.70(-0.63, 1.98)                                  | 1.60, (0.47, 2.92)                                 |
| IMD 2010 score                   | 0.02 ( 0.01, 0.03)                                 | 0.00 (-0.01, 0.01)                                 |

<sup>‡</sup> Spatially adjusted posterior mean (PM) from Bayesian geo-additive regression models after controlling for fixed effect of all air pollutions indicators: Mono-nitrogen Oxide (NOx), sulphur dioxide (So2), particulate matter (Pm), benzene (Ben) and combined index and the county of residence (spatial effects). <sup>†</sup> Spatially adjusted posterior mean (PM) from Bayesian geo-additive regression models after controlling for fixed effect of all air pollutions indicators: Mono-nitrogen Oxide (NOx), sulphur dioxide (So2), particulate matter (Pm), benzene (Ben) and combined index and the county of residence (spatial effects).

1  
2  
3  
4  
5  
6  
7  
8  
9  
10  
11  
12  
13  
14  
15  
16  
17  
18  
19  
20  
21  
22  
23  
24  
25  
26  
27  
28  
29  
30  
31  
32  
33  
34  
35  
36  
37  
38  
39  
40  
41  
42  
43  
44  
45  
46  
47  
48  
49  
50  
51  
52  
53  
54  
55  
56  
57  
58  
59  
60

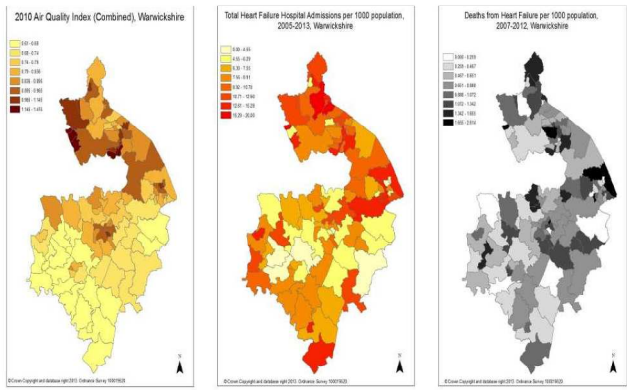

Figure 1  
297x420mm (300 x 300 DPI)

1  
2  
3  
4  
5  
6  
7  
8  
9  
10  
11  
12  
13  
14  
15  
16  
17  
18  
19  
20  
21  
22  
23  
24  
25  
26  
27  
28  
29  
30  
31  
32  
33  
34  
35  
36  
37  
38  
39  
40  
41  
42  
43  
44  
45  
46  
47  
48  
49  
50  
51  
52  
53  
54  
55  
56  
57  
58  
59  
60

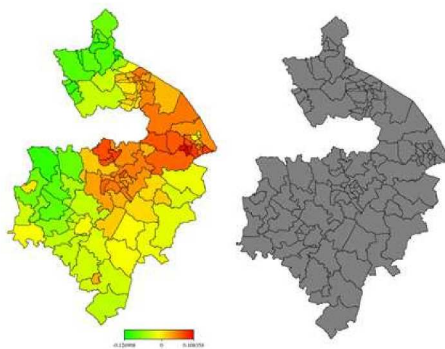

Figure 2  
297x420mm (300 x 300 DPI)

1  
2  
3  
4  
5  
6  
7  
8  
9  
10  
11  
12  
13  
14  
15  
16  
17  
18  
19  
20  
21  
22  
23  
24  
25  
26  
27  
28  
29  
30  
31  
32  
33  
34  
35  
36  
37  
38  
39  
40  
41  
42  
43  
44  
45  
46  
47  
48  
49  
50  
51  
52  
53  
54  
55  
56  
57  
58  
59  
60

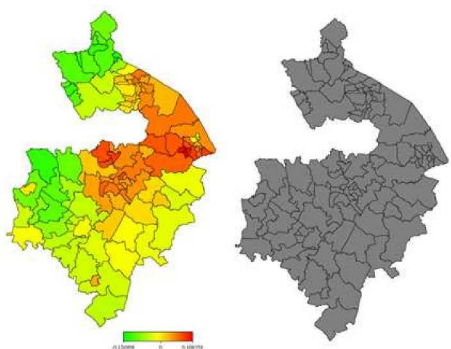

Figure 3  
297x420mm (300 x 300 DPI)



1  
2  
3  
4  
5  
6  
7  
8  
9  
10  
11  
12  
13  
14  
15  
16  
17  
18  
19  
20  
21  
22  
23  
24  
25  
26  
27  
28  
29  
30  
31  
32  
33  
34  
35  
36  
37  
38  
39  
40  
41  
42  
43  
44  
45  
46  
47  
48  
49  
50  
51  
52  
53  
54  
55  
56  
57  
58  
59  
60

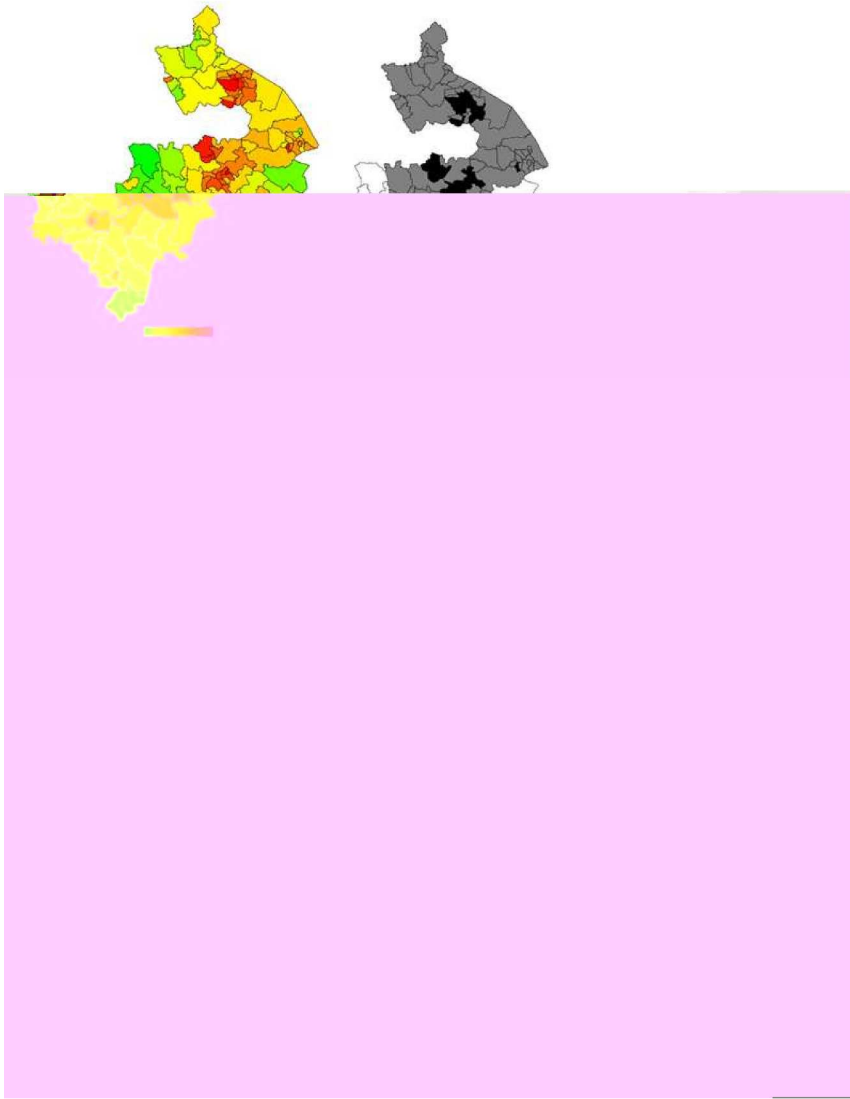

Figure 4  
297x420mm (300 x 300 DPI)

1  
2  
3  
4  
5  
6  
7  
8  
9  
10  
11  
12  
13  
14  
15  
16  
17  
18  
19  
20  
21  
22  
23  
24  
25  
26  
27  
28  
29  
30  
31  
32  
33  
34  
35  
36  
37  
38  
39  
40  
41  
42  
43  
44  
45  
46  
47  
48  
49  
50  
51  
52  
53  
54  
55  
56  
57  
58  
59  
60

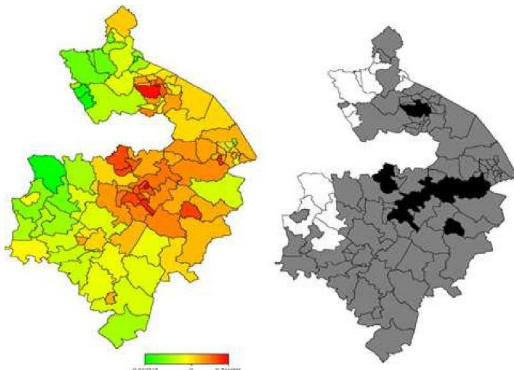

Figure 5  
297x420mm (300 x 300 DPI)

1  
2  
3  
4  
5  
6  
7  
8  
9  
10  
11  
12  
13  
14  
15  
16  
17  
18  
19  
20  
21  
22  
23  
24  
25  
26  
27  
28  
29  
30  
31  
32  
33  
34  
35  
36  
37  
38  
39  
40  
41  
42  
43  
44  
45  
46  
47  
48  
49  
50  
51  
52  
53  
54  
55  
56  
57  
58  
59  
60

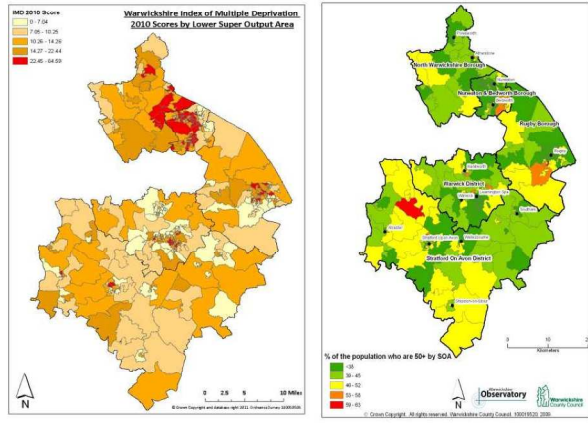

Figure 6  
297x420mm (300 x 300 DPI)

STROBE 2007 (v4) Statement—Checklist of items that should be included in reports of *cross-sectional studies*

| Section/Topic             | Item # | Recommendation                                                                                                                                                                       | Reported on page # |
|---------------------------|--------|--------------------------------------------------------------------------------------------------------------------------------------------------------------------------------------|--------------------|
| Title and abstract        | 1      | (a) Indicate the study’s design with a commonly used term in the title or the abstract                                                                                               | 2                  |
|                           |        | (b) Provide in the abstract an informative and balanced summary of what was done and what was found                                                                                  | 2                  |
| <b>Introduction</b>       |        |                                                                                                                                                                                      |                    |
| Background/rationale      | 2      | Explain the scientific background and rationale for the investigation being reported                                                                                                 | 4                  |
| Objectives                | 3      | State specific objectives, including any prespecified hypotheses                                                                                                                     | 4,5                |
| <b>Methods</b>            |        |                                                                                                                                                                                      |                    |
| Study design              | 4      | Present key elements of study design early in the paper                                                                                                                              | 4, 5               |
| Setting                   | 5      | Describe the setting, locations, and relevant dates, including periods of recruitment, exposure, follow-up, and data collection                                                      | 5,6                |
| Participants              | 6      | (a) Give the eligibility criteria, and the sources and methods of selection of participants                                                                                          | 5,6,               |
| Variables                 | 7      | Clearly define all outcomes, exposures, predictors, potential confounders, and effect modifiers. Give diagnostic criteria, if applicable                                             | 5-7                |
| Data sources/ measurement | 8*     | For each variable of interest, give sources of data and details of methods of assessment (measurement). Describe comparability of assessment methods if there is more than one group | 5-6                |
| Bias                      | 9      | Describe any efforts to address potential sources of bias                                                                                                                            | 7-8,12             |
| Study size                | 10     | Explain how the study size was arrived at                                                                                                                                            | 5                  |
| Quantitative variables    | 11     | Explain how quantitative variables were handled in the analyses. If applicable, describe which groupings were chosen and why                                                         | 7-8                |
| Statistical methods       | 12     | (a) Describe all statistical methods, including those used to control for confounding                                                                                                | 7,8                |
|                           |        | (b) Describe any methods used to examine subgroups and interactions                                                                                                                  | NA                 |
|                           |        | (c) Explain how missing data were addressed                                                                                                                                          | NA                 |
|                           |        | (d) If applicable, describe analytical methods taking account of sampling strategy                                                                                                   | NA                 |
|                           |        | (e) Describe any sensitivity analyses                                                                                                                                                | NA                 |
| <b>Results</b>            |        |                                                                                                                                                                                      |                    |

1  
2  
3  
4  
5  
6  
7  
8  
9  
10  
11  
12  
13  
14  
15  
16  
17  
18  
19  
20  
21  
22  
23  
24  
25  
26  
27  
28  
29  
30  
31  
32  
33  
34  
35  
36  
37  
38  
39  
40  
41  
42  
43  
44  
45  
46  
47  
48  
49

|                          |     |                                                                                                                                                                                                              |        |
|--------------------------|-----|--------------------------------------------------------------------------------------------------------------------------------------------------------------------------------------------------------------|--------|
| Participants             | 13* | (a) Report numbers of individuals at each stage of study—eg numbers potentially eligible, examined for eligibility, confirmed eligible, included in the study, completing follow-up, and analysed            | 2, 5,6 |
|                          |     | (b) Give reasons for non-participation at each stage                                                                                                                                                         | NA     |
|                          |     | (c) Consider use of a flow diagram                                                                                                                                                                           | NA     |
| Descriptive data         | 14* | (a) Give characteristics of study participants (eg demographic, clinical, social) and information on exposures and potential confounders                                                                     | 6      |
|                          |     | (b) Indicate number of participants with missing data for each variable of interest                                                                                                                          | NA     |
| Outcome data             | 15* | Report numbers of outcome events or summary measures                                                                                                                                                         | 10-11  |
| Main results             | 16  | (a) Give unadjusted estimates and, if applicable, confounder-adjusted estimates and their precision (eg, 95% confidence interval). Make clear which confounders were adjusted for and why they were included | 8      |
|                          |     | (b) Report category boundaries when continuous variables were categorized                                                                                                                                    | NA     |
|                          |     | (c) If relevant, consider translating estimates of relative risk into absolute risk for a meaningful time period                                                                                             | NA     |
| Other analyses           | 17  | Report other analyses done—eg analyses of subgroups and interactions, and sensitivity analyses                                                                                                               | NA     |
| <b>Discussion</b>        |     |                                                                                                                                                                                                              |        |
| Key results              | 18  | Summarise key results with reference to study objectives                                                                                                                                                     | 8-10   |
| Limitations              | 19  | Discuss limitations of the study, taking into account sources of potential bias or imprecision. Discuss both direction and magnitude of any potential bias                                                   | 11, 15 |
| Interpretation           | 20  | Give a cautious overall interpretation of results considering objectives, limitations, multiplicity of analyses, results from similar studies, and other relevant evidence                                   | 11-15  |
| Generalisability         | 21  | Discuss the generalisability (external validity) of the study results                                                                                                                                        | 11-15  |
| <b>Other information</b> |     |                                                                                                                                                                                                              |        |
| Funding                  | 22  | Give the source of funding and the role of the funders for the present study and, if applicable, for the original study on which the present article is based                                                | NA     |

\*Give information separately for cases and controls in case-control studies and, if applicable, for exposed and unexposed groups in cohort and cross-sectional studies.

**Note:** An Explanation and Elaboration article discusses each checklist item and gives methodological background and published examples of transparent reporting. The STROBE checklist is best used in conjunction with this article (freely available on the Web sites of PLoS Medicine at <http://www.plosmedicine.org/>, Annals of Internal Medicine at <http://www.annals.org/>, and Epidemiology at <http://www.epidem.com/>). Information on the STROBE Initiative is available at [www.strobe-statement.org](http://www.strobe-statement.org).

# BMJ Open

## Spatial variation of Heart Failure and Air Pollution in Warwickshire, UK: An investigation of small scale variation at the ward-level

|                                 |                                                                                                                                                                                                                                                                                                                                                                                                  |
|---------------------------------|--------------------------------------------------------------------------------------------------------------------------------------------------------------------------------------------------------------------------------------------------------------------------------------------------------------------------------------------------------------------------------------------------|
| Journal:                        | <i>BMJ Open</i>                                                                                                                                                                                                                                                                                                                                                                                  |
| Manuscript ID:                  | bmjopen-2014-006028.R2                                                                                                                                                                                                                                                                                                                                                                           |
| Article Type:                   | Research                                                                                                                                                                                                                                                                                                                                                                                         |
| Date Submitted by the Author:   | 03-Oct-2014                                                                                                                                                                                                                                                                                                                                                                                      |
| Complete List of Authors:       | Bennett, Oscar; Warwickshire County Council, Public Health Warwickshire,Communities Group<br>Kandala, Ngianga-Bakwin; University of Warwick, Warwick Medical School<br>Ji, Chen; University of Warwick, Warwick Medical School<br>Linnane, John; Warwickshire County Council, Public Health Warwickshire,Communities Group<br>Clarke, Aileen; University of Warwick, Division of Health Sciences |
| <b>Primary Subject Heading</b>: | Epidemiology                                                                                                                                                                                                                                                                                                                                                                                     |
| Secondary Subject Heading:      | Cardiovascular medicine, Epidemiology, Public health                                                                                                                                                                                                                                                                                                                                             |
| Keywords:                       | Heart failure < CARDIOLOGY, EPIDEMIOLOGY, SOCIAL MEDICINE                                                                                                                                                                                                                                                                                                                                        |
|                                 |                                                                                                                                                                                                                                                                                                                                                                                                  |

SCHOLARONE™  
Manuscripts

1  
2  
3 **Spatial variation of Heart Failure and Air Pollution in Warwickshire, UK:**  
4 **An investigation of small scale variation at the ward-level**  
5  
6

7 *Oscar Bennett MB BChir<sup>1</sup>, Ngianga-Bakwin Kandala PhD<sup>2,3</sup>, Chen Ji PhD<sup>2</sup>, John Linnane*  
8 *MD FFPHM<sup>1</sup>, Aileen Clarke MD PhD<sup>2</sup>*  
9

10  
11  
12 <sup>1</sup> Public Health Warwickshire, Communities Group, Warwickshire County Council ,Shire  
13 Hall, Barrack Street, Warwick, CV34 4RL, UK.

14 <sup>2</sup> Division of Health Sciences, University of Warwick Medical School, Coventry, CV4 7AL,  
15 UK.

16 <sup>3</sup> Division of Epidemiology and Biostatistics, School of Public Health, University of  
17 Witwatersrand, Johannesburg , South Africa.  
18  
19

20  
21  
22  
23  
24 **Running title:** Heart Failure and Air Pollution in Warwickshire  
25

26 **Keywords:** Warwickshire, Heart Failure, Air Pollution, epidemiology, spatial analyses  
27  
28

29  
30 **Correspondence to:**

31 Ngianga-Bakwin Kandala, PhD  
32 Division of Health Sciences  
33 University of Warwick Medical School  
34 Medical School Building  
35 Gibbet Hill Campus  
36 Coventry CV4 7AL  
37 United Kingdom  
38 Tel: + 44 (0) 2476150541  
39 Fax: + 44 (0) 2476528375  
40 Email: N-B.Kandala@[warwick.ac.uk](mailto:N-B.Kandala@warwick.ac.uk)  
41  
42  
43  
44  
45  
46  
47  
48  
49  
50  
51  
52  
53  
54  
55  
56  
57  
58  
59  
60

## Abstract

**Objectives:** To map using geospatial modelling techniques the morbidity and mortality caused by heart failure within Warwickshire to characterise and quantify any influence of air pollution on these risks.

**Design:** Cross-sectional.

**Setting:** Warwickshire, United Kingdom

**Participants:** Data from all of the 105 current Warwickshire County wards were collected on hospital admissions and deaths due to heart failure.

### Results

In multivariate analyses, the presence of a higher Mono-nitrogen Oxide (NO<sub>x</sub>) in a ward [3.35:1.89, 4.99], Benzene (Ben) [31.9:8.36, 55.85] and Index of Multiple Deprivation (IMD) [0.02: 0.01, 0.03], were consistently associated with a higher risk of heart failure morbidity. Particulate matter (Pm) [-12.93: -20.41, -6.54] was negatively associated with the risk of heart failure morbidity. No association was found between sulphur dioxide (So<sub>2</sub>) and heart failure morbidity.

The risk of heart failure mortality was higher in wards with a higher NO<sub>x</sub> [4.30: 1.68, 7.37] and wards with more inhabitants 50+ years old [1.60: 0.47, 2.92]. Pm was negatively associated [-14.69: -23.46, -6.50] with heart failure mortality. So<sub>2</sub>, Ben, and IMD score were not associated with heart failure mortality.

There was a prominent variation in heart failure morbidity and mortality risk across wards, the highest risk being in the regions around Nuneaton and Bedworth.

### Conclusion

This study showed distinct spatial patterns in heart failure morbidity and mortality, suggesting the potential role of environmental factors beyond individual-level risk factors. Air pollution levels should therefore be taken into account when considering the wider determinants of public health and the impact that changes in air pollution might have on the health of a population.



## ARTICLE FOCUS

- Air pollution has been linked to the development and exacerbation of a number of health problems including cardiovascular diseases such as heart failure.
- Heart failure is a serious condition that unfortunately affects many people in the UK. This link seems especially clear for cardiovascular and respiratory diseases such as ischaemic heart disease, heart failure, asthma, influenza, and lung cancer
- It is well established that the ambient levels of air pollution in a region can have an impact on the health status of the population which inhabits it

## KEY MESSAGES

1. Using a novel approach, this study has characterised and quantified the potential role of environmental factors (air pollutants) at the county-level.
2. The presence of a higher Mono-nitrogen Oxide (NO<sub>x</sub>) in a ward, benzene and poor Index of Multiple Deprivation (IMD) score were consistently associated with a higher risk of heart failure morbidity. Particulate matter (Pm) was negatively associated with the risk of heart failure morbidity.
3. The risk of heart failure mortality was higher in wards with a higher NO<sub>x</sub> and wards with more inhabitants 50+ years old. Pm was negatively associated with heart failure mortality.
4. Air pollution overall, when all pollution components were brought together into a combined index, was positively associated with both heart failure morbidity and mortality across Warwickshire.
5. There was a striking variation in heart failure morbidity and mortality risk across wards, the highest risk being in the regions around Nuneaton and Bedworth.

## STRENGTHS AND LIMITATIONS

- The model employed a fully Bayesian approach using Markov Chain Monte Carlo (MCMC) techniques for inference and model checking<sup>(11, 12)</sup>
- A single air pollution measurement in 2010 was used and it was assumed that there was no significant change in this value over the 2005-2013 periods that mortality and hospital admission data was gathered from.
- The cross-sectional nature of the study unfortunately does not allow us to establish temporality and thus clearly demonstrate causality of the observed associations.
- This was an ecological study, analysing characteristics and risk at the ward rather than individual level. Consequently associations and conclusions found from the aggregate data may not be directly applicable to individuals.

## Introduction

Air pollution has been linked to the development and exacerbation of a number of health problems. This link seems especially clear for cardiovascular and respiratory diseases such as ischaemic heart disease, heart failure, asthma, influenza, and lung cancer<sup>(1, 2, 3, 4)</sup>. It is well established that the ambient levels of air pollution in a region can have an impact on the health status of the population which inhabits it<sup>(5)</sup>. Air pollution levels should therefore be taken into account when considering the wider determinants of public health and the impact that changes in air pollution might have on the health of a population.

Warwickshire is an English county within the United Kingdom approximately 112 Kilometres North-West of London. The issue of air pollution has been highlighted in Warwickshire recently by the setting up of Air Quality Management Areas (AQMAs) in a number of different parts of the county. These are specific areas in the county that have been identified as places where, without a focused local council strategy to reduce air pollution, future government targets for air pollutant concentrations may not be met. Within Warwickshire the specific air pollutant that has been identified as a problem and led to these special areas being setup is mono-nitrogen oxides (NOx)<sup>(6)</sup>.

The objective of the present study was therefore to look for any relationship between levels of air pollution and the morbidity and mortality associated with heart failure within Warwickshire in the last few years (2005-2013 for morbidity, 2007-2012 for mortality). We examined a range of traditional air pollutants for an ecological association with heart failure morbidity and mortality at the county level. Furthermore, the present analysis attempted to highlight spatial patterns in heart failure morbidity and mortality risk within the county, after multiple adjustments for proximate, county-level factors. The geographic locations of wards within the county can be considered as proxy measures of many other unmeasured factors such as availability and access to health services, individual health seeking behaviour,

1 preventive ward policy and general ward factors. Such estimates might illustrate how much  
2  
3 can be learned by detailed exploratory analyses as well as how these data can be used to  
4  
5 strategically inform policy aiming at the prevention and management of serious conditions  
6  
7 such as heart failure in these settings.  
8  
9

### 10 11 12 **The evidence from published literature for the link between air pollution and health** 13 **problems** 14 15

16  
17 Studies have shown an effect on the health of populations caused by both long term exposure  
18  
19 as well as short term “spikes” in local air pollution levels<sup>(5)</sup>.  
20

21 A relevant systematic review and meta-analysis has been published recently in the Lancet<sup>(2)</sup>.  
22

23 It pooled the results of studies that have been conducted worldwide looking at the temporal  
24  
25 relationship between the levels of a number of different air pollutants with local heart failure  
26  
27 hospital admission rates and mortality rates. This showed a clear link between short term rises  
28  
29 in all types of air pollution (except ozone) and rises in hospital admissions and mortality due  
30  
31 to heart failure. This study did not look at any potential effects from long term exposure to air  
32  
33 pollution. However it did provide strong evidence that air pollution can ‘exacerbate’ heart  
34  
35 failure, increasing the likelihood that a patient with existing heart failure will become  
36  
37 sufficiently unwell to require hospital admission, or even die.  
38  
39

40  
41 The ESCAPE study<sup>(3)</sup>, published recently in the Lancet Oncology, pooling the results of 17  
42  
43 cohort studies from around Europe looked at the ambient levels of air pollution in an area  
44  
45 (particulate matter and NO<sub>x</sub>) and the incidence of lung cancers in the inhabitants of this area  
46  
47 during many years of follow up (mean 12.8 years). This was intended to look at the risk  
48  
49 associated with long term exposure to air pollution. A statistically significant correlation was  
50  
51 found between the levels of particulate matter air pollution and the local incidence of lung  
52  
53 cancer diagnoses. Particulate matter with a diameter of less than 10 µm had a hazard ratio of  
54  
55 1.22 [95% CI 1.03-1.45] per (10 µg/cubic meter). In other words, for every increase in  
56  
57  
58  
59  
60

1 particulate matter pollution of 10 µg/cubic meter there was a corresponding immediate  
2  
3 increase in the chance of being diagnosed with lung cancer of 22% (95% CI 3% - 45%).  
4  
5 There was also a correlation between traffic volume within 100m of a residence and a modest  
6  
7 increase in the rate of lung cancer (Hazard ratio 1.09 (CI 0.99-1.21)). No similar correlation  
8  
9 was found with NO<sub>x</sub> air pollution. This suggests that long term exposure to higher levels of  
10  
11 particulate matter air pollution may increase the incidence of lung cancer in a population.  
12  
13 Another study published in the United States in 2004 looked at the long term effect of  
14  
15 exposure to particulate matter air pollution and the mortality attributed to different  
16  
17 cardiovascular and respiratory diseases in different areas of the United States<sup>(4)</sup>. A good  
18  
19 correlation was found between the degree of long term exposure to particulate matter air  
20  
21 pollution and increases in mortality from cardiovascular diseases, including heart failure.  
22  
23 Interestingly this was not found to be the case for most respiratory diseases. There was also an  
24  
25 element of the study that looked at the effect of a person's smoking status on the mortality  
26  
27 statistics. This found, as expected, a strong link between mortality and smoking. However it  
28  
29 also found that air pollution contributed additional cardiovascular mortality risk on top of that  
30  
31 attributed to smoking. This was at least an additive, if not a synergistic effect.  
32  
33  
34  
35  
36  
37  
38

## 39 **Methods**

### 40 *Study data*

41  
42 In order to carry out this project, data was collected about the geographical distribution of air  
43  
44 pollution within Warwickshire. This data included information about each of four individual  
45  
46 components of air pollution (NO<sub>x</sub>, sulphur dioxide, particulate matter, and benzene) which  
47  
48 could then be united into a combined index (all of the contributions added together). A single  
49  
50 recorded level from 2010 of each air pollutant for each ward was used in the study. This was  
51  
52 then compared to collected data about:  
53  
54  
55  
56  
57  
58  
59  
60

- 1 (i) The geographical distribution of home addresses of patients who were admitted to  
2 hospital because of heart failure or a complication of heart failure. Hospital  
3 admission rate in an area due to heart failure was used as a proxy indicator for the  
4 level of heart failure morbidity within that area.  
5  
6 (ii) The geographical distribution of home addresses of patients who died from heart  
7 failure, or whose death was contributed to by heart failure.  
8  
9

10 These data were collected by the Warwickshire Observatory, which is part of the  
11 Warwickshire County Council in charge of collecting and handling statistics relating to the  
12 county. Mortality data for the analysis was supplied via the Warwickshire Public Health  
13 Intelligence Team and was sourced from the Public Health Mortality Files, Office for  
14 National Statistics. Hospital admissions data was accessed via the Ventris Business  
15 Intelligence System, Arden Commissioning Support Unit."  
16  
17

18 Ward level population data were obtained from the 2011 census. Warwickshire is divided into  
19 105 wards. Data from all of the 105 current Warwickshire County wards were collected.  
20 The potential confounding variables of firstly age structure of a population within a ward and  
21 secondly levels of social deprivation within a ward were identified<sup>(7,8)</sup>. These were then  
22 controlled for in the second stage of the statistical analysis (see below).  
23

24 Information about the age structure of wards was obtained from the Office of National  
25 Statistics mid 2010 estimates (obtained from the Warwickshire Observatory website)<sup>(9)</sup>. The  
26 representative statistical value of “percentage (%) of population above age 50” was used as an  
27 indicator of wards with a higher proportion of older people.  
28

29 Information about social deprivation was obtained from the English Indices of Deprivation  
30 published by the Department for Communities and Local Government<sup>(10)</sup>. The Index of  
31 Multiple Deprivation (IMD) averaged across each ward was used as an indicator of the level  
32 of deprivation within the wards of Warwickshire.  
33  
34  
35  
36  
37  
38  
39  
40  
41  
42  
43  
44  
45  
46  
47  
48  
49  
50  
51  
52  
53  
54  
55  
56  
57  
58  
59  
60

1 The information on crude observed air pollution level distribution, heart failure hospital  
 2 admission rates and mortality rates were then represented on maps of Warwickshire (Figure  
 3 1).  
 4  
 5  
 6  
 7  
 8  
 9

### 10 *Statistical Analysis*

11 To account for spatial autocorrelation in observed heart failure hospital admission and  
 12 mortality rates at the ward level, in Warwickshire, we applied a unified approach to account  
 13 for possible air pollution effects of environmental risk factors. This was achieved using a geo-  
 14 additive semi-parametric mixed model. The model employed a fully Bayesian approach using  
 15 Markov Chain Monte Carlo (MCMC) techniques for inference and model checking<sup>(11, 12)</sup>.  
 16 Response variables were defined as the count (per 1000 population) of heart failure morbidity  
 17 or mortality in a ward (Poisson model):  $y_i / \eta_i, \delta \sim B(\eta_i, \delta)$  for a binomial formulation.

18 (Poisson model):  $y_i / \eta_i, \delta \sim B(\eta_i, \delta)$  (1) for a binomial formulation and a geo-additive semi-  
 19 parametric predictor  $\mu_i = h(\eta_i)$ :

$$20 \eta_i = f_1(x_{i1}) + \dots + f_p(x_{ip}) + f_{spat}(s_i) + \epsilon_i \quad (2)$$

21 where  $h$  is a known response function with a poisson link function,  $f_1, \dots, f_p$  are non-linear  
 22 smoothed effects of the metrical covariates (time in years), and  $f_{spat}(s_i)$  is the effect of the  
 23 spatial covariate  $s_i \in \{1, \dots, S\}$  labelling the ward in Warwickshire. Regression models with  
 24 predictors such as those in equation 2 are sometimes referred to as geo-additive models. P-  
 25 spline priors were assigned to the functions  $f_1, \dots, f_p$ , non-informative priors were used for  
 26 fixed effects parameters and a Markov random field prior was used for  $f_{spat}(s_i)$ . More detailed  
 27 information about the modelling approach can be found elsewhere<sup>(11, 13)</sup>. The standard  
 28 measure of effect was the posterior mean (PM) and 95% credible region (CR).  
 29  
 30  
 31  
 32  
 33  
 34  
 35  
 36  
 37  
 38  
 39  
 40  
 41  
 42  
 43  
 44  
 45  
 46  
 47  
 48  
 49  
 50  
 51  
 52

53 The analysis was carried out using version 2.0.1 of the BayesX software package, which  
 54 permits Bayesian inference based on MCMC simulation techniques<sup>(13)</sup>. Multivariate Bayesian  
 55 geo-additive regression models were used to evaluate the significance of the posterior mean  
 56  
 57  
 58  
 59  
 60

(PM) determined for the fixed effects and spatial effects between air pollution and the morbidity and mortality from heart failure within Warwickshire. Each component of air pollution was looked at separately and then also the combined index in unadjusted models. Next, fully adjusted multivariate Bayesian geo-additive regressions analysis were performed to look again for statistically significant correlation between these variables, but this time further controlling for any influence from age structure or social deprivation.

## Results

**Figure 1** and **Figure 6** display the observed data collected for this study on maps using graduated colouring to represent data value categories within each ward.

### *Observed Air Quality Map*

**Figure 1left** was produced using 2010 data from the Warwickshire Observatory. It is based on a combined air quality indicator which is a combination of information about the contribution to air pollution from NO<sub>x</sub>, sulphur dioxide, particulate matter, and benzene. The Warwickshire Observatory description of this index reads as follows:

“Combined Air Quality Indicator (estimates of emissions for four pollutants: benzene, nitrogen dioxide, sulphur dioxide and particulates) for small areas (modelled to 1 km grid squares) where an index value of 1 is equivalent to the national standard for each pollutant. The values are then summed so an overall score of 4 would represent all four pollutants being present at the national standard level.”<sup>(14)</sup> These specific standards are described in the Air Quality Standards Regulations 2010.

The geographical pattern of the observed air pollution across the county shows a higher level of air pollution near the more urban centres of Birmingham and Coventry. The proximity of parts of the county to motorways such as the M6 and M42 could also be a contributing factor

1 to the observed pattern. There was no place in the county where the level of any pollutant  
2 exceeded the national standard in 2010.  
3  
4

5  
6  
7 *Heart Failure Hospital Admission Map*

8  
9 **Figure 1centre** shows the geographical distribution of the density of home addresses of  
10 patients admitted to hospital with a diagnosis of heart failure (or exacerbation of heart failure)  
11 within the April 2005- April 2013 period.  
12  
13  
14

15  
16  
17  
18 *Heart Failure Mortality Map*

19  
20 **Figure 1right** shows the geographical distribution of the density of home addresses of  
21 patients who died either directly or in part from heart failure in the 2007-2012 (inclusive)  
22 periods.  
23  
24  
25  
26  
27  
28  
29

30 **Table 1** (left panel) displays posterior means of heart failure admission across the selected  
31 covariates following multivariate Bayesian geo-additive regression analyses.  
32  
33

34 The Posterior mean (PM) & 95% Credible Region (CR) of overall hospital admission rates  
35 due to heart failure and mortality rates from heart failure were [6.19 (3.84, 8.97)] and [4.13  
36 (1.18, 7.43)] (Table 1) respectively. On average, the presence of a higher Mono-nitrogen  
37 oxide indicator (NO<sub>x</sub>) in a ward [Posterior mean (PM) & 95% Credible Region (CR): 3.35  
38 (1.89, 4.99)], Benzene indicator (Ben) [31.9 (8.36, 55.85)] and IMD 2010 score [0.02 (0.01,  
39 0.03)], were consistently associated with higher risk of heart failure morbidity. The  
40 particulates indicator (Pm) [-12.93 (-20.41, -6.54)] was negatively associated with the risk of  
41 heart failure morbidity. Sulphur dioxide indicator (So<sub>2</sub>) was not associated with heart failure  
42 morbidity.  
43  
44  
45  
46  
47  
48  
49  
50  
51  
52  
53  
54  
55  
56  
57  
58  
59  
60



1 **Table 1** (right panel) shows the same corresponding results for heart failure mortality. This  
2  
3 table shows that the risk of heart failure mortality was higher in wards with a higher Mono-  
4  
5 nitrogen oxide indicator (NOx) [4.30 (1.68, 7.37)] and wards with more inhabitants over 50  
6  
7 years old [1.60 (0.47, 2.92)]. The particulates indicator (Pm) was negatively associated with  
8  
9 heart failure mortality. The sulphur dioxide indicator (So2), Benzene indicator (Ben), and  
10  
11 IMD score were not associated with heart failure mortality.  
12  
13

14  
15  
16  
17 The combined air pollution index (all indicators averaged together) when incorporated into a  
18  
19 separate model combining age and social deprivation was significantly positively associated  
20  
21 with both heart failure morbidity [1.39 (0.87, 1.81)] and mortality [1.79 (0.85, 2.55)] across  
22  
23 the county.  
24  
25

26  
27  
28 In **Figure 2** and **Figure 4**, the left-hand maps show the unadjusted estimates of posterior total  
29  
30 residual ward means of heart failure morbidity and mortality respectively. In **Figure 3** and  
31  
32 **Figure 5**, the left-hand maps show the adjusted PM after multiple adjustment for the  
33  
34 geographical location, taking into account the auto-correlation structure in the data, the  
35  
36 uncertainty in the ward level and all ward-level risk factors (air pollution components, age,  
37  
38 social deprivation) for heart failure morbidity and mortality respectively. The red colour  
39  
40 indicates the maximum posterior mean recorded while green denotes the lowest mean. The  
41  
42 right-hand maps in **Figures 2, 3, 4** and **5** show the 95% posterior probability of heart failure  
43  
44 and mortality, which indicate the statistical significance associated with the total excess risk.  
45  
46 Black colour indicates a negative spatial effect (associated with increased risk of heart failure  
47  
48 and mortality), white colour a positive effect (a decreased risk) and grey colour a non-  
49  
50 significant effect.  
51  
52

53  
54  
55 In general, there was consistently higher heart failure morbidity risk in northern wards  
56  
57 particularly around Nuneaton and Bedworth and lower heart failure morbidity risks in the  
58  
59  
60

1 southern wards particularly within the district of Stratford-on-Avon. However, all this  
2 variation could partially be accounted for within the model generated within this study (taking  
3 into account air pollution, age, and social deprivation levels).  
4  
5  
6  
7

8 Heart failure mortality risk was, in general, higher in northern wards around Nuneaton and  
9 Bedworth as well as in some central areas around Warwick, Royal Leamington Spa, and  
10 Kenilworth. Heart failure mortality risk was again lower in more southern wards particularly  
11 within Stratford-on-Avon. Unlike with morbidity however, our model could not explain all  
12 this variation in heart failure mortality. Even after taking into account air pollution, age, and  
13 social deprivation the rate of death from heart failure remained significantly higher than  
14 would be expected in areas within and around Nuneaton, Bedworth, Warwick, Royal  
15 Leamington Spa, and Kenilworth.  
16  
17  
18  
19  
20  
21  
22  
23  
24  
25

26 In sensitivity analyses, we tested several models and our results were not substantially altered  
27 after removing one or two pollutants (data not shown).  
28  
29  
30  
31  
32  
33  
34

## 35 Discussion

36 Before even considering air pollution, this study helps to demonstrate the inequality of risk  
37 from heart failure disease and death that exists for individuals living in different parts of the  
38 county of Warwickshire. There is a significant excess risk of both disease and death in more  
39 northern wards within and surrounding Nuneaton and Bedworth. Much (but not all) of this  
40 variation could be attributed to the air pollution, age structure and social deprivation that  
41 exists in these areas according to our model. Measures that seek to address air pollution and  
42 social deprivation could be expected therefore to help mitigate against cardiovascular risks  
43 within these local populations.  
44  
45  
46  
47  
48  
49  
50  
51  
52  
53  
54  
55  
56  
57  
58  
59  
60

1 The present study corroborates the notion that air pollution is an increasingly important public  
2 health issue in Warwickshire. Higher levels of the average air pollution index looked at in this  
3 study correlated significantly with increased levels of both heart failure morbidity and  
4 mortality across the county, even after removing the effects of age structure and social  
5 deprivation. The individual component of NO<sub>x</sub> air pollution seems particularly to contribute  
6 risk to both the morbidity and mortality of heart failure within the county, suggesting that it  
7 may have a particularly detrimental effect on heart failure patients. This reinforces the  
8 importance of the AQMAs set up within the county in response to high NO<sub>x</sub> levels. Road  
9 traffic is a large contributor to air pollution within Warwickshire. Diesel engines are  
10 responsible for a large part of the NO<sub>x</sub> component of these emissions.  
11  
12  
13  
14  
15  
16  
17  
18  
19  
20  
21  
22

23 An unexpected result also appeared within our analysis. Particulate matter air pollution  
24 became significantly, negatively correlated with both heart failure morbidity and mortality  
25 when incorporated into our model with all risk factors taken into account and controlled for in  
26 this study. This would imply some sort of unexpected “protective influence” from particulate  
27 matter air pollution on heart failure patients. This clearly contradicts our expectations and is at  
28 odds with a wealth of existing evidence that indicates that particulate matter air pollution  
29 contributes risk to and exacerbates cardiovascular disease<sup>(4)</sup>.  
30  
31  
32  
33  
34  
35  
36  
37  
38  
39  
40

41 We offer a possible explanation for this based on the following four observations:

- 42 1. The above-mentioned negative correlation of particulate matter air pollution with heart  
43 failure morbidity and mortality in our model.  
44
- 45 2. Particulate matter air pollution actually varied very little across the county compared  
46 to the other types of air pollution. All types of air pollution tended to decrease in rural  
47 areas, but particulate matter tended to decrease much *less* compared to the other  
48 components of air pollution. Consequently in rural areas of the county where most  
49  
50  
51  
52  
53  
54  
55  
56  
57  
58  
59  
60

1 types of air pollution are significantly lower, particulate matter pollution was  
2 relatively higher compared to NOx, Benzene, and SO2.  
3

- 4
- 5 3. There seems to be a high risk of heart failure deaths in urban centres (particularly  
6 Nuneaton, Bedworth, Warwick, Royal Leamington Spa, and Kenilworth), higher than  
7 can be explained by our model.  
8
  - 9 4. Conversely, there seems to be a particularly low risk of heart failure deaths in some  
10 rural areas within the western part of Stratford-on-Avon, lower than can be explained  
11 by our model.  
12
- 13

14  
15  
16  
17  
18  
19 A possible hypothesis based on these observations is that there is an additional factor  
20 influencing the morbidity and mortality of heart failure not looked at in this study, namely the  
21 urban/rural nature of a patient's living environment. It could be the case that living in an  
22 urban environment contributed risk and living in a rural area provided protection against heart  
23 failure morbidity and mortality. This would be an effect in *addition* to any increase in air  
24 pollution or social deprivation within urban settings compared to rural settings. This could  
25 certainly in principle be plausible, with people in rural areas perhaps doing more physical  
26 activity, eating more healthily etc. If this were the case it would explain the excess deaths in  
27 urban centres found in this study. It could also be responsible for the unexpected protective  
28 factor attributed to particulate matter air pollution in our analysis. Given that the particulate  
29 matter component of air pollution is *relatively* higher than the other components in rural  
30 areas, the protection that living in rural areas affords individuals could be misleadingly  
31 attributed (in our statistical analysis) to the particulate matter component of air pollution  
32 present in these areas. Further work will need to be done looking into this possible link  
33 between urban/rural living environments and heart failure morbidity and mortality. It could be  
34 very revealing to carefully characterise this effect if it indeed exists, as it may be an indication  
35 of unrecognised cardiovascular risk/protective factors associated with urban/rural living that  
36 exists within Warwickshire.  
37  
38  
39  
40  
41  
42  
43  
44  
45  
46  
47  
48  
49  
50  
51  
52  
53  
54  
55  
56  
57  
58  
59  
60

1 However, it is also important to bear in mind that this is an ecological study and all the  
2 relationships picked up between variables in this study have been found using aggregate data  
3 at the ward level (number over 50 years of age, average IMD score, average air pollution  
4 across ward, overall numbers of deaths and hospital admissions due to heart failure). It is not  
5 always a trivial task to extrapolate the conclusions drawn from such a study down to the level  
6 of individuals. Such a task would involve drilling down to individual level data and repeating  
7 the analysis, a task that was beyond the scope of this particular study. It is possible that the  
8 unexpected negative correlation between particulate matter air pollution and heart failure  
9 could disappear when data is analysed at the individual level – an example of an ecological  
10 fallacy. Consequently it would be prudent to regard the results from the individual  
11 components of air pollution with cautious interest, rather than viewing them as proof of any  
12 real effects.  
13  
14  
15  
16  
17  
18  
19  
20  
21  
22  
23  
24  
25  
26

27 However, despite these caveats, this study has been able to provide some helpful information  
28 at the population level worthy of consideration. A health inequality has been revealed, and the  
29 manner with which this inequality is influenced by age, social deprivation, and the combined  
30 index of air pollution has been demonstrated. Such information should help inform policy  
31 decisions that would influence society at a population level and hopefully improve public  
32 health in the long run.  
33  
34  
35  
36  
37  
38  
39  
40  
41  
42

43 There are some limitations in this study worth considering that result from assumptions made  
44 along the way. A single air pollution measurement in 2010 was used and it was assumed that  
45 there was no significant change in this value over the 2005-2013 periods that mortality and  
46 hospital admission data was gathered from. The resulting cross-sectional nature of the study  
47 does not allow establishing temporality and thus causality of the observed associations. There  
48 was also no way to determine the length of time that individual members of the population  
49 within a ward had lived in that area, and thus how long they had been exposed to the  
50  
51  
52  
53  
54  
55  
56  
57  
58  
59  
60

1 measured ambient air pollution level. It was assumed that people with home addresses in a  
2 ward were exposed significantly to the levels of air pollution in that ward. Finally, as already  
3 mentioned, this was an ecological study, using aggregate data of risk factors to look for  
4 associations with aggregate data of morbidity and mortality. It is not always possible to apply  
5 such associations from a population level down to the individuals within that population.  
6  
7  
8  
9  
10  
11  
12  
13

14 In summary, this study has provided a number of interesting results. Firstly it has helped to  
15 quantify and map the inequality that exists across different parts of Warwickshire with  
16 regards to heart failure risk. It has also provided some interesting circumstantial evidence of a  
17 link between heart failure morbidity and air pollution. Finally it has also given a suggestion of  
18 a possible link between living in urban environments and a higher risk of cardiovascular  
19 disease, and a corresponding lower risk from living in rural environments. More work will  
20 need to be done to look into this particular possibility. It would be informative to run this type  
21 of analysis whilst factoring in the influence of a person's distance from their nearest urban  
22 centre. This urban/rural factor should be further explored and mined for additional  
23 information as it could be an indication of hitherto unconsidered factors influencing the health  
24 status of the population of Warwickshire and possibly further afield.  
25  
26  
27  
28  
29  
30  
31  
32  
33  
34  
35  
36  
37  
38

39 In order to determine the validity of our conclusions at the individual level further work  
40 would need to be done analysing the available data from individual patients (risks and  
41 outcomes). Such work could help to characterise the true effect of different components of air  
42 pollution at the individual level. It would also be interesting to determine if the different  
43 components of air pollution act as effect modifiers on each other.  
44  
45  
46  
47  
48  
49

50 It would be possible to look at the effects of air pollution variation in the shorter term as well.  
51 For example, looking at how local "spikes" in air pollution affect the rates of hospital  
52 admissions locally immediately following it. This could be done in Leamington Spa where  
53 there is an air quality monitoring station constantly measuring the levels of air pollutants.  
54  
55  
56  
57  
58  
59  
60

1 Other health problems, such as ischaemic heart disease and respiratory diseases, have been  
2  
3 linked with air pollution as well and it could be informative to also look into these links  
4  
5 locally.  
6  
7  
8  
9

### 10 **Contributorship statement:**

11 OB conceived the idea, analyzed the data, contributed to formulating the results and wrote the  
12 first draft. N-B K analyzed the data, advised on statistical aspects, contributed to formulating  
13 the results, wrote the second draft. CJ analyzed the data. JL helped coordinate the project  
14 and co-wrote the final draft; AC coordinated the project, advised on all aspects and co-wrote  
15 the final draft.  
16  
17  
18  
19  
20  
21  
22

### 23 **Funding:**

24 *This paper presents independent research supported by the National Institute for Health  
25 Research (NIHR) Collaborations for Leadership in Applied Health Research and Care West  
26 Midlands. The views expressed are those of the author(s) and not necessarily those of the  
27 NHS, the NIHR or the Department of Health.*  
28  
29  
30  
31  
32  
33

34 **Competing interests:** The authors declared no conflict of interest.  
35  
36

37 **Data sharing:** No additional data available.  
38

### 39 **References**

- 40 1. Particulate Air Pollution and Hospital Emergency Room Visits for Asthma in Seattle,  
41 Joel Schwartz, Daniel Slater, Timothy V. Larson, William E. Pierson, and Jane Q.  
42 Koenig. American Review of Respiratory Disease, Vol. 147, No. 4 (1993), pp. 826-  
43 831.
- 44 2. Global association of air pollution and heart failure: a systematic review and meta-  
45 analysis, Anoop SV Shah, Jeremy P Langrish, Harish Nair, David A McAllister,  
46 Amanda L Hunter, Prof Ken Donaldson, Prof David E Newby, Dr Nicholas L Mills.  
47 The Lancet, Early Online Publication, 10 July 2013  
48 DOI: 10.1016/S0140-6736(13)60898-3
- 49 3. Air pollution and lung cancer incidence in 17 European cohorts: prospective analyses  
50 from the European Study of Cohorts for Air Pollution Effects (ESCAPE), Raaschou-  
51 Nielsen O, Andersen ZJ, et al. Lancet Oncol. 2013 Aug;14(9):813-22
- 52 4. Cardiovascular Mortality and Long-Term Exposure to Particulate Air Pollution,  
53 Epidemiological Evidence of General Pathophysiological Pathways of Disease  
54 C. Arden Pope III, Richard T. Burnett, et al. Circulation. 2004; 109: 71-77  
55  
56  
57  
58  
59  
60

5. Air pollution and health, Bert Brunekreef, Stephen T Holgate, *The Lancet*, Volume 360, Issue 9341, 19 October 2002, Pages 1233–1242
6. Department of Environment, Food and Rural Affairs (DEFRA), department website, weblink (accessed 2/12/13):  
[http://aqma.defra.gov.uk/aqma/local\\_authorities.php?la\\_id=296](http://aqma.defra.gov.uk/aqma/local_authorities.php?la_id=296)
7. Epidemiology, pathophysiology, and etiology of congestive heart failure in older adults. Rich MW. *J Am Geriatr Soc*. 1997 Aug;45(8):968-74.
8. Influence of socioeconomic deprivation on the primary care burden and treatment of patients with a diagnosis of heart failure in general practice in Scotland: population based study. F A McAlister, N F Murphy, et al. *BMJ*. 2004 May 8; 328(7448): 1110.
9. Warwickshire Observatory website – ONS population estimates. Web link (accessed on 3/10/13):  
<http://www.warwickshireobservatory.org/observatory/observatorywcc.nsf/05a17cfbd3bcf85d802572920033cf0f/bfb8b0a1d34f274c802572c00048108f?OpenDocument>
10. Deprivation data produced by the Department for Communities and Local Government. File located at web link (accessed on 3/10/13):  
<https://www.gov.uk/government/publications/english-indices-of-deprivation-2010>  
Ward based population weighted averages calculated from LSOA specific data by the London Health Observatory and North East Public Health Observatory.
11. Fahrmeir L, Lang S. Bayesian Inference for Generalized Additive Mixed Models Based on Markov Random Field Priors. *Applied Statistics (JRSS C)*. 2001;50:201-20.
12. Kandala N-B, Tigbe W, Manda S, Stranges S. Spatial Variation of Predictors of Hypertension in Sub-Saharan Africa: A Case Study of South-Africa. *American Journal of Hypertension* 2013. 10.1093/ajh/hps063.
13. Belitz C, Brezger A, Kneib T, Lang S. BayesX Software for Bayesian Inference in Structured Additive Regression Models Version 2.0.1, 2012. Accessed at:  
[http://www.stat.uni-muenchen.de/~bayesx/manual/methodology\\_manual.pdf](http://www.stat.uni-muenchen.de/~bayesx/manual/methodology_manual.pdf)
14. Taken from the Warwickshire Observatory Quality of Life in Warwickshire 2012/13 report. Weblink (accessed on 3/10/13):  
[http://maps.warwickshire.gov.uk/iareports/environmental\\_issues/](http://maps.warwickshire.gov.uk/iareports/environmental_issues/)

### Author's contributions

OB conceived the idea, analyzed the data, contributed to formulating the results and wrote the first draft.

N-B K analyzed the data, advised on statistical aspects, contributed to formulating the results, wrote the second draft. CJ analyzed the data. JL helped coordinate the project and co-wrote the final draft; AC coordinated the project, advised on all aspects and co-wrote the final draft.



## Figure legends

**Figure 1 :** Warwickshire map with 2010 air quality index (all components of air pollution combined) displayed by ward (left; Warwickshire map with number of heart failure hospital admissions per 1000 population between 2005 – 2013 displayed by ward(centre) and Warwickshire map with total heart failure deaths per 1000 population between 2007 – 2012 displayed by ward(right).

[FIGURE 1 ABOUT HERE]

**Figure 2:** Left: Unadjusted total residual spatial effects of morbidity risk associated with heart failure, at ward level in Warwickshire. Shown are the posterior means. Right: Corresponding posterior probabilities at 80% nominal level.

[FIGURE 2 ABOUT HERE]

*Red coloured – high risk*  
*Green coloured – low risk*

*Black coloured – significant positive spatial effect*  
*White coloured- significant negative spatial effect*  
*Grey coloured – no significant effect*

**Figure 3:** Left: Total residual spatial effects of morbidity risk associated with heart failure, at ward level in Warwickshire. Shown are the posterior means of the full model (IMD 2010, Over 50, and the 4 indicators of air pollution). Right: Corresponding posterior probabilities at 80% nominal level.

[FIGURE 3 ABOUT HERE]

*Red coloured – high risk*  
*Green coloured – low risk*

*Black coloured – significant positive spatial effect*  
*White coloured- significant negative spatial effect*  
*Grey coloured – no significant effect*

**Figure 4:** Left: Unadjusted total residual spatial effects of mortality risk associated with heart failure, at ward level in Warwickshire. Shown are the posterior means. Right: Corresponding posterior probabilities at 80% nominal level.

[FIGURE 4 ABOUT HERE]

*Red coloured – high risk*  
*Green coloured – low risk*

*Black coloured – significant positive spatial effect*  
*White coloured- significant negative spatial effect*  
*Grey coloured – no significant effect*

**Figure 5:** Left: Total residual spatial effects of mortality risk associated with heart failure, at ward level in Warwickshire. Shown are the posterior means of the full model (IMD 2010, Over 50, and the 4 indicators of air pollution). Right: Corresponding posterior probabilities at 80% nominal level.

[FIGURE 5 ABOUT HERE]

*Red coloured – high risk*  
*Green coloured – low risk*

*Black coloured – significant positive spatial effect*  
*White coloured- significant negative spatial effect*  
*Grey coloured – no significant effect*

**Figure 6 –** Warwickshire map displaying the 2010 levels of deprivation (expressed as Multiple Deprivation Scores) by LSOAs. Produced by the Warwickshire Observatory (left) and Warwickshire map displaying the 2008 midyear estimates of % of people over the age of 50 by SOA. Produced by the Warwickshire Observatory (right).

**Table 1: Posterior mean (PM) of fixed effects estimates of heart failure admission and mortality across air pollutions indicators (Warwickshire 2005-2013)**

| Variable                         | Heart failure admission<br>PM & 95%CI <sup>‡</sup> | Heart failure mortality<br>PM & 95%CI <sup>†</sup> |
|----------------------------------|----------------------------------------------------|----------------------------------------------------|
| Constant                         | 6.19 (3.84, 8.97)                                  | 4.13 (1.18, 7.43)                                  |
| Nitrogen dioxide indicator (No2) | 3.35 (1.89, 4.99)                                  | 4.30 (1.68, 7.37)                                  |
| Sulphur dioxide indicator (So2)) | 7.75 (-3.84, 17.99)                                | 11.02 (-1.21, 22.41)                               |
| Particulates indicator (Pm)      | -12.93 (-20.41, -6.54)                             | -14.69 (-23.46, -6.50)                             |
| Benzene indicator (Ben)          | [31.9:8.36, 55.85]                                 | 25.98 (-6.62, 54.22)                               |
| Over 50 years %                  | 0.70(-0.63, 1.98)                                  | 1.60, (0.47, 2.92)                                 |
| IMD 2010 score                   | 0.02 ( 0.01, 0.03)                                 | 0.00 (-0.01, 0.01)                                 |

<sup>‡</sup> Spatially adjusted posterior mean (PM) from Bayesian geo-additive regression models after controlling for fixed effect of all air pollutions indicators: Mono-nitrogen Oxide (NOx), sulphur dioxide (So2), particulate matter (Pm), benzene (Ben) and combined index and the county of residence (spatial effects). <sup>†</sup> Spatially adjusted posterior mean (PM) from Bayesian geo-additive regression models after controlling for fixed effect of all air pollutions indicators: Mono-nitrogen Oxide (NOx), sulphur dioxide (So2), particulate matter (Pm), benzene (Ben) and combined index and the county of residence (spatial effects).

1  
2  
3 **Spatial variation of Heart Failure and Air Pollution in Warwickshire, UK:**  
4 **An investigation of small scale variation at the ward-level**  
5  
6

7 *Oscar Bennett MB BChir<sup>1</sup>, Ngianga-Bakwin Kandala PhD<sup>2,3</sup>, Chen Ji PhD<sup>2</sup>, John Linnane*  
8 *MD FFPHM<sup>1</sup>, Aileen Clarke MD PhD<sup>2</sup>*  
9

10  
11  
12 <sup>1</sup> Public Health Warwickshire, Communities Group, Warwickshire County Council ,Shire  
13 Hall, Barrack Street, Warwick, CV34 4RL, UK.

14 <sup>2</sup> Division of Health Sciences, University of Warwick Medical School, Coventry, CV4 7AL,  
15 UK.

16 <sup>3</sup> Division of Epidemiology and Biostatistics, School of Public Health, University of  
17 Witwatersrand, Johannesburg , South Africa.  
18  
19  
20  
21  
22

23  
24 **Running title:** Heart Failure and Air Pollution in Warwickshire  
25

26 **Keywords:** Warwickshire, Heart Failure, Air Pollution, epidemiology, spatial analyses  
27  
28  
29

30 **Correspondence to:**

31 Ngianga-Bakwin Kandala, PhD  
32 Division of Health Sciences  
33 University of Warwick Medical School  
34 Medical School Building  
35 Gibbet Hill Campus  
36 Coventry CV4 7AL  
37 United Kingdom  
38 Tel: + 44 (0) 2476150541  
39 Fax: + 44 (0) 2476528375  
40 Email: N-B.Kandala@[warwick.ac.uk](mailto:N-B.Kandala@warwick.ac.uk)  
41  
42  
43  
44  
45  
46  
47  
48  
49  
50  
51  
52  
53  
54  
55  
56  
57  
58  
59  
60

## Abstract

**Objectives:** To map using geospatial modelling techniques the morbidity and mortality caused by heart failure within Warwickshire to characterise and quantify any influence of air pollution on these risks.

**Design:** Cross-sectional.

**Setting:** Warwickshire, United Kingdom

**Participants:** Data from all of the 105 current Warwickshire County wards were collected on hospital admissions and deaths due to heart failure.

### Results

In multivariate analyses, the presence of a higher **Mono-nitrogen Oxide (NO<sub>x</sub>)** in a ward [3.35:1.89, 4.99], **Benzene (Ben)** [31.9:8.36, 55.85] and **Index of Multiple Deprivation (IMD)** [0.02: 0.01, 0.03], were consistently associated with a higher risk of heart failure morbidity. **Particulate matter (Pm)** [-12.93: -20.41, -6.54] was negatively associated with the risk of heart failure morbidity. No association was found between **sulphur dioxide (So<sub>2</sub>)** and heart failure morbidity.

The risk of heart failure mortality was higher in wards with a higher NO<sub>x</sub> [4.30: 1.68, 7.37] and wards with more inhabitants 50+ years old [1.60: 0.47, 2.92]. Pm was negatively associated [-14.69: -23.46, -6.50] with heart failure mortality. So<sub>2</sub>, Ben, and IMD score were not associated with heart failure mortality.

There was a prominent variation in heart failure morbidity and mortality risk across wards, the highest risk being in the regions around Nuneaton and Bedworth.

### Conclusion

This study showed distinct spatial patterns in heart failure morbidity and mortality, suggesting the potential role of environmental factors beyond individual-level risk factors. Air pollution levels should therefore be taken into account when considering the wider determinants of public health and the impact that changes in air pollution might have on the health of a population.

## ARTICLE FOCUS

- Air pollution has been linked to the development and exacerbation of a number of health problems including cardiovascular diseases such as heart failure.
- Heart failure is a serious condition that unfortunately affects many people in the UK. This link seems especially clear for cardiovascular and respiratory diseases such as ischaemic heart disease, heart failure, asthma, influenza, and lung cancer
- It is well established that the ambient levels of air pollution in a region can have an impact on the health status of the population which inhabits it

## KEY MESSAGES

1. Using a novel approach, this study has characterised and quantified the potential role of environmental factors (air pollutants) at the county-level.
2. The presence of a higher Mono-nitrogen Oxide (NO<sub>x</sub>) in a ward, benzene and poor Index of Multiple Deprivation (IMD) score were consistently associated with a higher risk of heart failure morbidity. Particulate matter (Pm) was negatively associated with the risk of heart failure morbidity.
3. The risk of heart failure mortality was higher in wards with a higher NO<sub>x</sub> and wards with more inhabitants 50+ years old. Pm was negatively associated with heart failure mortality.
4. Air pollution overall, when all pollution components were brought together into a combined index, was positively associated with both heart failure morbidity and mortality across Warwickshire.
5. There was a striking variation in heart failure morbidity and mortality risk across wards, the highest risk being in the regions around Nuneaton and Bedworth.

## STRENGTHS AND LIMITATIONS

- The model employed a fully Bayesian approach using Markov Chain Monte Carlo (MCMC) techniques for inference and model checking<sup>(11, 12)</sup>
- A single air pollution measurement in 2010 was used and it was assumed that there was no significant change in this value over the 2005-2013 periods that mortality and hospital admission data was gathered from.
- The cross-sectional nature of the study unfortunately does not allow us to establish temporality and thus clearly demonstrate causality of the observed associations.
- This was an ecological study, analysing characteristics and risk at the ward rather than individual level. Consequently associations and conclusions found from the aggregate data may not be directly applicable to individuals.

## Introduction

Air pollution has been linked to the development and exacerbation of a number of health problems. This link seems especially clear for cardiovascular and respiratory diseases such as ischaemic heart disease, heart failure, asthma, influenza, and lung cancer<sup>(1, 2, 3, 4)</sup>. It is well established that the ambient levels of air pollution in a region can have an impact on the health status of the population which inhabits it<sup>(5)</sup>. Air pollution levels should therefore be taken into account when considering the wider determinants of public health and the impact that changes in air pollution might have on the health of a population.

Warwickshire is an English county within the United Kingdom approximately 112 Kilometres North-West of London. The issue of air pollution has been highlighted in Warwickshire recently by the setting up of Air Quality Management Areas (AQMAs) in a number of different parts of the county. These are specific areas in the county that have been identified as places where, without a focused local council strategy to reduce air pollution, future government targets for air pollutant concentrations may not be met. Within Warwickshire the specific air pollutant that has been identified as a problem and led to these special areas being setup is mono-nitrogen oxides (NOx)<sup>(6)</sup>.

The objective of the present study was therefore to look for any relationship between levels of air pollution and the morbidity and mortality associated with heart failure within Warwickshire in the last few years (2005-2013 for morbidity, 2007-2012 for mortality). We examined a range of traditional air pollutants for an ecological association with heart failure morbidity and mortality at the county level. Furthermore, the present analysis attempted to highlight spatial patterns in heart failure morbidity and mortality risk within the county, after multiple adjustments for proximate, county-level factors. The geographic locations of wards within the county can be considered as proxy measures of many other unmeasured factors such as availability and access to health services, individual health seeking behaviour,

1 preventive ward policy and general ward factors. Such estimates might illustrate how much  
2  
3 can be learned by detailed exploratory analyses as well as how these data can be used to  
4  
5 strategically inform policy aiming at the prevention and management of serious conditions  
6  
7 such as heart failure in these settings.  
8  
9

### 10 11 12 **The evidence from published literature for the link between air pollution and health** 13 **problems** 14

15  
16  
17 Studies have shown an effect on the health of populations caused by both long term exposure  
18  
19 as well as short term “spikes” in local air pollution levels<sup>(5)</sup>.  
20

21 A relevant systematic review and meta-analysis has been published recently in the Lancet<sup>(2)</sup>.  
22

23 It pooled the results of studies that have been conducted worldwide looking at the temporal  
24  
25 relationship between the levels of a number of different air pollutants with local heart failure  
26  
27 hospital admission rates and mortality rates. This showed a clear link between short term rises  
28  
29 in all types of air pollution (except ozone) and rises in hospital admissions and mortality due  
30  
31 to heart failure. This study did not look at any potential effects from long term exposure to air  
32  
33 pollution. However it did provide strong evidence that air pollution can ‘exacerbate’ heart  
34  
35 failure, increasing the likelihood that a patient with existing heart failure will become  
36  
37 sufficiently unwell to require hospital admission, or even die.  
38  
39

40  
41 The ESCAPE study<sup>(3)</sup>, published recently in the Lancet Oncology, pooling the results of 17  
42  
43 cohort studies from around Europe looked at the ambient levels of air pollution in an area  
44  
45 (particulate matter and NO<sub>x</sub>) and the incidence of lung cancers in the inhabitants of this area  
46  
47 during many years of follow up (mean 12.8 years). This was intended to look at the risk  
48  
49 associated with long term exposure to air pollution. A statistically significant correlation was  
50  
51 found between the levels of particulate matter air pollution and the local incidence of lung  
52  
53 cancer diagnoses. Particulate matter with a diameter of less than 10 µm had a hazard ratio of  
54  
55 1.22 [95% CI 1.03-1.45] per (10 µg/cubic meter). In other words, for every increase in  
56  
57  
58  
59  
60

1 particulate matter pollution of 10 µg/cubic meter there was a corresponding immediate  
2  
3 increase in the chance of being diagnosed with lung cancer of 22% (95% CI 3% - 45%).  
4  
5 There was also a correlation between traffic volume within 100m of a residence and a modest  
6  
7 increase in the rate of lung cancer (Hazard ratio 1.09 (CI 0.99-1.21)). No similar correlation  
8  
9 was found with NO<sub>x</sub> air pollution. This suggests that long term exposure to higher levels of  
10  
11 particulate matter air pollution may increase the incidence of lung cancer in a population.  
12  
13  
14 Another study published in the United States in 2004 looked at the long term effect of  
15  
16 exposure to particulate matter air pollution and the mortality attributed to different  
17  
18 cardiovascular and respiratory diseases in different areas of the United States<sup>(4)</sup>. A good  
19  
20 correlation was found between the degree of long term exposure to particulate matter air  
21  
22 pollution and increases in mortality from cardiovascular diseases, including heart failure.  
23  
24 Interestingly this was not found to be the case for most respiratory diseases. There was also an  
25  
26 element of the study that looked at the effect of a person's smoking status on the mortality  
27  
28 statistics. This found, as expected, a strong link between mortality and smoking. However it  
29  
30 also found that air pollution contributed additional cardiovascular mortality risk on top of that  
31  
32 attributed to smoking. This was at least an additive, if not a synergistic effect.  
33  
34  
35  
36  
37  
38

## 39 **Methods**

### 40 *Study data*

41  
42 In order to carry out this project, data was collected about the geographical distribution of air  
43  
44 pollution within Warwickshire. This data included information about each of four individual  
45  
46 components of air pollution (NO<sub>x</sub>, sulphur dioxide, particulate matter, and benzene) which  
47  
48 could then be united into a combined index (all of the contributions added together). A single  
49  
50 recorded level from 2010 of each air pollutant for each ward was used in the study. This was  
51  
52 then compared to collected data about:  
53  
54  
55  
56  
57  
58  
59  
60



- 1 (i) The geographical distribution of home addresses of patients who were admitted to  
2 hospital because of heart failure or a complication of heart failure. Hospital  
3 admission rate in an area due to heart failure was used as a proxy indicator for the  
4 level of heart failure morbidity within that area.  
5  
6 (ii) The geographical distribution of home addresses of patients who died from heart  
7 failure, or whose death was contributed to by heart failure.  
8  
9

10 These data were collected by the Warwickshire Observatory, which is part of the  
11 Warwickshire County Council in charge of collecting and handling statistics relating to the  
12 county. Mortality data for the analysis was supplied via the Warwickshire Public Health  
13 Intelligence Team and was sourced from the Public Health Mortality Files, Office for  
14 National Statistics. Hospital admissions data was accessed via the Ventris Business  
15 Intelligence System, Arden Commissioning Support Unit."  
16  
17

18 Ward level population data were obtained from the 2011 census. Warwickshire is divided into  
19 105 wards. Data from all of the 105 current Warwickshire County wards were collected.  
20 The potential confounding variables of firstly age structure of a population within a ward and  
21 secondly levels of social deprivation within a ward were identified<sup>(7,8)</sup>. These were then  
22 controlled for in the second stage of the statistical analysis (see below).  
23  
24

25 Information about the age structure of wards was obtained from the Office of National  
26 Statistics mid 2010 estimates (obtained from the Warwickshire Observatory website)<sup>(9)</sup>. The  
27 representative statistical value of “percentage (%) of population above age 50” was used as an  
28 indicator of wards with a higher proportion of older people.  
29  
30

31 Information about social deprivation was obtained from the English Indices of Deprivation  
32 published by the Department for Communities and Local Government<sup>(10)</sup>. The Index of  
33 Multiple Deprivation (IMD) averaged across each ward was used as an indicator of the level  
34 of deprivation within the wards of Warwickshire.  
35  
36  
37  
38  
39  
40  
41  
42  
43  
44  
45  
46  
47  
48  
49  
50  
51  
52  
53  
54  
55  
56  
57  
58  
59  
60

1 The information on crude observed air pollution level distribution, heart failure hospital  
 2 admission rates and mortality rates were then represented on maps of Warwickshire (Figure  
 3 1).  
 4  
 5  
 6  
 7  
 8  
 9

### 10 *Statistical Analysis*

11 To account for spatial autocorrelation in observed heart failure hospital admission and  
 12 mortality rates at the ward level, in Warwickshire, we applied a unified approach to account  
 13 for possible air pollution effects of environmental risk factors. This was achieved using a geo-  
 14 additive semi-parametric mixed model. The model employed a fully Bayesian approach using  
 15 Markov Chain Monte Carlo (MCMC) techniques for inference and model checking<sup>(11, 12)</sup>.  
 16 Response variables were defined as the count (per 1000 population) of heart failure morbidity  
 17 or mortality in a ward (Poisson model):  $y_i / \eta_i, \delta \sim B(\eta_i, \delta)$  for a binomial formulation.

18 (Poisson model):  $y_i / \eta_i, \delta \sim B(\eta_i, \delta)$  (1) for a binomial formulation and a geo-additive semi-  
 19 parametric predictor  $\mu_i = h(\eta_i)$ :

$$20 \eta_i = f_1(x_{i1}) + \dots + f_p(x_{ip}) + f_{spat}(s_i) + \epsilon_i \quad (2)$$

21 where  $h$  is a known response function with a poisson link function,  $f_1, \dots, f_p$  are non-linear  
 22 smoothed effects of the metrical covariates (time in years), and  $f_{spat}(s_i)$  is the effect of the  
 23 spatial covariate  $s_i \in \{1, \dots, S\}$  labelling the ward in Warwickshire. Regression models with  
 24 predictors such as those in equation 2 are sometimes referred to as geo-additive models. P-  
 25 spline priors were assigned to the functions  $f_1, \dots, f_p$ , **non-informative priors were used for**  
 26 **fixed effects parameters** and a Markov random field prior was used for  $f_{spat}(s_i)$ . More detailed  
 27 information about the modelling approach can be found elsewhere<sup>(11, 13)</sup>. The standard  
 28 measure of effect was the posterior mean (PM) and 95% credible region (CR).  
 29  
 30  
 31  
 32  
 33  
 34  
 35  
 36  
 37  
 38  
 39  
 40  
 41  
 42  
 43  
 44  
 45  
 46  
 47  
 48  
 49  
 50  
 51  
 52

53 The analysis was carried out using version 2.0.1 of the BayesX software package, which  
 54 permits Bayesian inference based on MCMC simulation techniques<sup>(13)</sup>. Multivariate Bayesian  
 55 geo-additive regression models were used to evaluate the significance of the posterior mean  
 56  
 57  
 58  
 59  
 60

1 (PM) determined for the fixed effects and spatial effects between air pollution and the  
2 morbidity and mortality from heart failure within Warwickshire. Each component of air  
3 pollution was looked at separately and then also the combined index in unadjusted models.  
4  
5  
6  
7  
8 Next, fully adjusted multivariate Bayesian geo-additive regressions analysis were performed  
9  
10 to look again for statistically significant correlation between these variables, but this time  
11  
12 further controlling for any influence from age structure or social deprivation.  
13

## 14 15 16 17 **Results**

18  
19 **Figure 1** and **Figure 6** display the observed data collected for this study on maps using  
20  
21 graduated colouring to represent data value categories within each ward.  
22  
23

### 24 25 26 *Observed Air Quality Map*

27  
28 **Figure 1left** was produced using 2010 data from the Warwickshire Observatory. It is based  
29  
30 on a combined air quality indicator which is a combination of information about the  
31  
32 contribution to air pollution from NO<sub>x</sub>, sulphur dioxide, particulate matter, and benzene. The  
33  
34 Warwickshire Observatory description of this index reads as follows:  
35

36  
37 “Combined Air Quality Indicator (estimates of emissions for four pollutants: benzene,  
38  
39 nitrogen dioxide, sulphur dioxide and particulates) for small areas (modelled to 1 km grid  
40  
41 squares) where an index value of 1 is equivalent to the national standard for each pollutant.  
42  
43 The values are then summed so an overall score of 4 would represent all four pollutants being  
44  
45 present at the national standard level.”<sup>(14)</sup> These specific standards are described in the Air  
46  
47 Quality Standards Regulations 2010.  
48  
49

50  
51 The geographical pattern of the observed air pollution across the county shows a higher level  
52  
53 of air pollution near the more urban centres of Birmingham and Coventry. The proximity of  
54  
55 parts of the county to motorways such as the M6 and M42 could also be a contributing factor  
56  
57  
58  
59  
60

1 to the observed pattern. There was no place in the county where the level of any pollutant  
2 exceeded the national standard in 2010.  
3  
4

5  
6  
7 *Heart Failure Hospital Admission Map*

8  
9 **Figure 1centre** shows the geographical distribution of the density of home addresses of  
10 patients admitted to hospital with a diagnosis of heart failure (or exacerbation of heart failure)  
11 within the April 2005- April 2013 period.  
12  
13  
14

15  
16  
17  
18 *Heart Failure Mortality Map*

19  
20 **Figure 1right** shows the geographical distribution of the density of home addresses of  
21 patients who died either directly or in part from heart failure in the 2007-2012 (inclusive)  
22 periods.  
23  
24  
25  
26  
27  
28  
29

30 **Table 1** (left panel) displays posterior means of heart failure admission across the selected  
31 covariates following multivariate Bayesian geo-additive regression analyses.  
32  
33

34 The Posterior mean (PM) & 95% Credible Region (CR) of overall hospital admission rates  
35 due to heart failure and mortality rates from heart failure were [6.19 (3.84, 8.97)] and [4.13  
36 (1.18, 7.43)] (**Table 1**) respectively. On average, the presence of a higher Mono-nitrogen  
37 oxide indicator (NO<sub>x</sub>) in a ward [Posterior mean (PM) & 95% Credible Region (CR): 3.35  
38 (1.89, 4.99)], Benzene indicator (Ben) [31.9 (8.36, 55.85)] and IMD 2010 score [0.02 (0.01,  
39 0.03)], were consistently associated with higher risk of heart failure morbidity. The  
40 particulates indicator (Pm) [-12.93 (-20.41, -6.54)] was negatively associated with the risk of  
41 heart failure morbidity. Sulphur dioxide indicator (So<sub>2</sub>) was not associated with heart failure  
42 morbidity.  
43  
44  
45  
46  
47  
48  
49  
50  
51  
52  
53  
54  
55  
56  
57  
58  
59  
60

1 **Table 1** (right panel) shows the same corresponding results for heart failure mortality. This  
2  
3 table shows that the risk of heart failure mortality was higher in wards with a higher Mono-  
4  
5 nitrogen oxide indicator (NOx) [4.30 (1.68, 7.37)] and wards with more inhabitants over 50  
6  
7 years old [1.60 (0.47, 2.92)]. The particulates indicator (Pm) was negatively associated with  
8  
9 heart failure mortality. The sulphur dioxide indicator (So2), Benzene indicator (Ben), and  
10  
11 IMD score were not associated with heart failure mortality.  
12  
13

14  
15  
16  
17 The combined air pollution index (all indicators averaged together) when incorporated into a  
18  
19 separate model combining age and social deprivation was significantly positively associated  
20  
21 with both heart failure morbidity [1.39 (0.87, 1.81)] and mortality [1.79 (0.85, 2.55)] across  
22  
23 the county.  
24  
25

26  
27  
28 In **Figure 2** and **Figure 4**, the left-hand maps show the unadjusted estimates of posterior total  
29  
30 residual ward means of heart failure morbidity and mortality respectively. In **Figure 3** and  
31  
32 **Figure 5**, the left-hand maps show the adjusted PM after multiple adjustment for the  
33  
34 geographical location, taking into account the auto-correlation structure in the data, the  
35  
36 uncertainty in the ward level and all ward-level risk factors (air pollution components, age,  
37  
38 social deprivation) for heart failure morbidity and mortality respectively. The red colour  
39  
40 indicates the maximum posterior mean recorded while green denotes the lowest mean. The  
41  
42 right-hand maps in **Figures 2, 3, 4** and **5** show the 95% posterior probability of heart failure  
43  
44 and mortality, which indicate the statistical significance associated with the total excess risk.  
45  
46 Black colour indicates a negative spatial effect (associated with increased risk of heart failure  
47  
48 and mortality), white colour a positive effect (a decreased risk) and grey colour a non-  
49  
50 significant effect.  
51  
52

53  
54  
55 In general, there was consistently higher heart failure morbidity risk in northern wards  
56  
57 particularly around Nuneaton and Bedworth and lower heart failure morbidity risks in the  
58  
59  
60

1 southern wards particularly within the district of Stratford-on-Avon. However, all this  
2 variation could partially be accounted for within the model generated within this study (taking  
3 into account air pollution, age, and social deprivation levels).  
4  
5  
6  
7

8 Heart failure mortality risk was, in general, higher in northern wards around Nuneaton and  
9 Bedworth as well as in some central areas around Warwick, Royal Leamington Spa, and  
10 Kenilworth. Heart failure mortality risk was again lower in more southern wards particularly  
11 within Stratford-on-Avon. Unlike with morbidity however, our model could not explain all  
12 this variation in heart failure mortality. Even after taking into account air pollution, age, and  
13 social deprivation the rate of death from heart failure remained significantly higher than  
14 would be expected in areas within and around Nuneaton, Bedworth, Warwick, Royal  
15 Leamington Spa, and Kenilworth.  
16  
17  
18  
19  
20  
21  
22  
23  
24  
25

26 In sensitivity analyses, we tested several models and our results were not substantially altered  
27 after removing one or two **pollutants** (data not shown).  
28  
29  
30  
31  
32  
33  
34

## 35 Discussion

36 Before even considering air pollution, this study helps to demonstrate the inequality of risk  
37 from heart failure disease and death that exists for individuals living in different parts of the  
38 county of Warwickshire. There is a significant excess risk of both disease and death in more  
39 northern wards within and surrounding Nuneaton and Bedworth. Much (but not all) of this  
40 variation could be attributed to the air pollution, age structure and social deprivation that  
41 exists in these areas according to our model. Measures that seek to address air pollution and  
42 social deprivation could be expected therefore to help mitigate against cardiovascular risks  
43 within these local populations.  
44  
45  
46  
47  
48  
49  
50  
51  
52  
53  
54  
55  
56  
57  
58  
59  
60

1 The present study corroborates the notion that air pollution is an increasingly important public  
2 health issue in Warwickshire. Higher levels of the average air pollution index looked at in this  
3 study correlated significantly with increased levels of both heart failure morbidity and  
4 mortality across the county, even after removing the effects of age structure and social  
5 deprivation. The individual component of NO<sub>x</sub> air pollution seems particularly to contribute  
6 risk to both the morbidity and mortality of heart failure within the county, suggesting that it  
7 may have a particularly detrimental effect on heart failure patients. This reinforces the  
8 importance of the AQMAs set up within the county in response to high NO<sub>x</sub> levels. Road  
9 traffic is a large contributor to air pollution within Warwickshire. Diesel engines are  
10 responsible for a large part of the NO<sub>x</sub> component of these emissions.  
11  
12  
13  
14  
15  
16  
17  
18  
19  
20  
21  
22

23 An unexpected result also appeared within our analysis. Particulate matter air pollution  
24 became significantly, negatively correlated with both heart failure morbidity and mortality  
25 when incorporated into our model with all risk factors taken into account and controlled for in  
26 this study. This would imply some sort of unexpected “protective influence” from particulate  
27 matter air pollution on heart failure patients. This clearly contradicts our expectations and is at  
28 odds with a wealth of existing evidence that indicates that particulate matter air pollution  
29 contributes risk to and exacerbates cardiovascular disease<sup>(4)</sup>.  
30  
31  
32  
33  
34  
35  
36  
37  
38  
39  
40

41 We offer a possible explanation for this based on the following four observations:  
42

- 43 1. The above-mentioned negative correlation of particulate matter air pollution with heart  
44 failure morbidity and mortality in our model.  
45
- 46 2. Particulate matter air pollution actually varied very little across the county compared  
47 to the other types of air pollution. All types of air pollution tended to decrease in rural  
48 areas, but particulate matter tended to decrease much *less* compared to the other  
49 components of air pollution. Consequently in rural areas of the county where most  
50  
51  
52  
53  
54  
55  
56  
57  
58  
59  
60

1 types of air pollution are significantly lower, particulate matter pollution was  
2 relatively higher compared to NOx, Benzene, and SO2.  
3

- 4
- 5
- 6 3. There seems to be a high risk of heart failure deaths in urban centres (particularly  
7 Nuneaton, Bedworth, Warwick, Royal Leamington Spa, and Kenilworth), higher than  
8 can be explained by our model.  
9
- 10
- 11
- 12 4. Conversely, there seems to be a particularly low risk of heart failure deaths in some  
13 rural areas within the western part of Stratford-on-Avon, lower than can be explained  
14 by our model.  
15  
16  
17

18

19 A possible hypothesis based on these observations is that there is an additional factor  
20 influencing the morbidity and mortality of heart failure not looked at in this study, namely the  
21 urban/rural nature of a patient's living environment. It could be the case that living in an  
22 urban environment contributed risk and living in a rural area provided protection against heart  
23 failure morbidity and mortality. This would be an effect in *addition* to any increase in air  
24 pollution or social deprivation within urban settings compared to rural settings. This could  
25 certainly in principle be plausible, with people in rural areas perhaps doing more physical  
26 activity, eating more healthily etc. If this were the case it would explain the excess deaths in  
27 urban centres found in this study. It could also be responsible for the unexpected protective  
28 factor attributed to particulate matter air pollution in our analysis. Given that the particulate  
29 matter component of air pollution is *relatively* higher than the other components in rural  
30 areas, the protection that living in rural areas affords individuals could be misleadingly  
31 attributed (in our statistical analysis) to the particulate matter component of air pollution  
32 present in these areas. Further work will need to be done looking into this possible link  
33 between urban/rural living environments and heart failure morbidity and mortality. It could be  
34 very revealing to carefully characterise this effect if it indeed exists, as it may be an indication  
35 of unrecognised cardiovascular risk/protective factors associated with urban/rural living that  
36 exists within Warwickshire.  
37  
38  
39  
40  
41  
42  
43  
44  
45  
46  
47  
48  
49  
50  
51  
52  
53  
54  
55  
56  
57  
58  
59  
60



1 However, it is also important to bear in mind that this is an ecological study and all the  
2 relationships picked up between variables in this study have been found using aggregate data  
3 at the ward level (number over 50 years of age, average IMD score, average air pollution  
4 across ward, overall numbers of deaths and hospital admissions due to heart failure). It is not  
5 always a trivial task to extrapolate the conclusions drawn from such a study down to the level  
6 of individuals. Such a task would involve drilling down to individual level data and repeating  
7 the analysis, a task that was beyond the scope of this particular study. **It is possible that the  
8 unexpected negative correlation between particulate matter air pollution and heart failure  
9 could disappear when data is analysed at the individual level – an example of an ecological  
10 fallacy.** Consequently it would be prudent to regard the results from the individual  
11 components of air pollution with cautious interest, rather than viewing them as proof of any  
12 real effects.  
13  
14  
15  
16  
17  
18  
19  
20  
21  
22  
23  
24  
25  
26

27 However, despite these caveats, this study has been able to provide some helpful information  
28 at the population level worthy of consideration. A health inequality has been revealed, and the  
29 manner with which this inequality is influenced by age, social deprivation, and the combined  
30 index of air pollution has been demonstrated. Such information should help inform policy  
31 decisions that would influence society at a population level and hopefully improve public  
32 health in the long run.  
33  
34  
35  
36  
37  
38  
39  
40  
41  
42

43 There are some limitations in this study worth considering that result from assumptions made  
44 along the way. A single air pollution measurement in 2010 was used and it was assumed that  
45 there was no significant change in this value over the 2005-2013 periods that mortality and  
46 hospital admission data was gathered from. The resulting cross-sectional nature of the study  
47 does not allow establishing temporality and thus causality of the observed associations. There  
48 was also no way to determine the length of time that individual members of the population  
49 within a ward had lived in that area, and thus how long they had been exposed to the  
50  
51  
52  
53  
54  
55  
56  
57  
58  
59  
60

1 measured ambient air pollution level. It was assumed that people with home addresses in a  
2 ward were exposed significantly to the levels of air pollution in that ward. Finally, as already  
3 mentioned, this was an ecological study, using aggregate data of risk factors to look for  
4 associations with aggregate data of morbidity and mortality. It is not always possible to apply  
5 such associations from a population level down to the individuals within that population.  
6  
7  
8  
9  
10  
11  
12  
13

14 In summary, this study has provided a number of interesting results. Firstly it has helped to  
15 quantify and map the inequality that exists across different parts of Warwickshire with  
16 regards to heart failure risk. It has also provided some interesting circumstantial evidence of a  
17 link between heart failure morbidity and air pollution. Finally it has also given a suggestion of  
18 a possible link between living in urban environments and a higher risk of cardiovascular  
19 disease, and a corresponding lower risk from living in rural environments. More work will  
20 need to be done to look into this particular possibility. It would be informative to run this type  
21 of analysis whilst factoring in the influence of a person's distance from their nearest urban  
22 centre. This urban/rural factor should be further explored and mined for additional  
23 information as it could be an indication of hitherto unconsidered factors influencing the health  
24 status of the population of Warwickshire and possibly further afield.  
25  
26  
27  
28  
29  
30  
31  
32  
33  
34  
35  
36  
37  
38

39 In order to determine the validity of our conclusions at the individual level further work  
40 would need to be done analysing the available data from individual patients (risks and  
41 outcomes). Such work could help to characterise the true effect of different components of air  
42 pollution at the individual level. It would also be interesting to determine if the different  
43 components of air pollution act as effect modifiers on each other.  
44  
45  
46  
47  
48  
49

50 It would be possible to look at the effects of air pollution variation in the shorter term as well.  
51 For example, looking at how local "spikes" in air pollution affect the rates of hospital  
52 admissions locally immediately following it. This could be done in Leamington Spa where  
53 there is an air quality monitoring station constantly measuring the levels of air pollutants.  
54  
55  
56  
57  
58  
59  
60

1 Other health problems, such as ischaemic heart disease and respiratory diseases, have been  
2  
3 linked with air pollution as well and it could be informative to also look into these links  
4  
5 locally.  
6  
7  
8  
9

### 10 **Contributorship statement:**

11 OB conceived the idea, analyzed the data, contributed to formulating the results and wrote the  
12 first draft. N-B K analyzed the data, advised on statistical aspects, contributed to formulating  
13 the results, wrote the second draft. CJ analyzed the data. JL helped coordinate the project  
14 and co-wrote the final draft; AC coordinated the project, advised on all aspects and co-wrote  
15 the final draft.  
16  
17  
18  
19  
20  
21  
22

### 23 **Funding:**

24 *This paper presents independent research supported by the National Institute for Health  
25 Research (NIHR) Collaborations for Leadership in Applied Health Research and Care West  
26 Midlands. The views expressed are those of the author(s) and not necessarily those of the  
27 NHS, the NIHR or the Department of Health.*  
28  
29  
30  
31  
32  
33

34 **Competing interests:** The authors declared no conflict of interest.  
35

36 **Data sharing:** Not application  
37

### 38 **References**

- 39 1. Particulate Air Pollution and Hospital Emergency Room Visits for Asthma in Seattle,  
40 Joel Schwartz, Daniel Slater, Timothy V. Larson, William E. Pierson, and Jane Q.  
41 Koenig. American Review of Respiratory Disease, Vol. 147, No. 4 (1993), pp. 826-  
42 831.
- 43 2. Global association of air pollution and heart failure: a systematic review and meta-  
44 analysis, Anoop SV Shah, Jeremy P Langrish, Harish Nair, David A McAllister,  
45 Amanda L Hunter, Prof Ken Donaldson, Prof David E Newby, Dr Nicholas L Mills.  
46 The Lancet, Early Online Publication, 10 July 2013  
47 DOI: 10.1016/S0140-6736(13)60898-3
- 48 3. Air pollution and lung cancer incidence in 17 European cohorts: prospective analyses  
49 from the European Study of Cohorts for Air Pollution Effects (ESCAPE), Raaschou-  
50 Nielsen O, Andersen ZJ, et al. Lancet Oncol. 2013 Aug;14(9):813-22
- 51 4. Cardiovascular Mortality and Long-Term Exposure to Particulate Air Pollution,  
52 Epidemiological Evidence of General Pathophysiological Pathways of Disease  
53 C. Arden Pope III, Richard T. Burnett, et al. Circulation. 2004; 109: 71-77  
54  
55  
56  
57  
58  
59  
60

5. Air pollution and health, Bert Brunekreef, Stephen T Holgate, *The Lancet*, Volume 360, Issue 9341, 19 October 2002, Pages 1233–1242
6. Department of Environment, Food and Rural Affairs (DEFRA), department website, weblink (accessed 2/12/13):  
[http://aqma.defra.gov.uk/aqma/local\\_authorities.php?la\\_id=296](http://aqma.defra.gov.uk/aqma/local_authorities.php?la_id=296)
7. Epidemiology, pathophysiology, and etiology of congestive heart failure in older adults. Rich MW. *J Am Geriatr Soc*. 1997 Aug;45(8):968-74.
8. Influence of socioeconomic deprivation on the primary care burden and treatment of patients with a diagnosis of heart failure in general practice in Scotland: population based study. F A McAlister, N F Murphy, et al. *BMJ*. 2004 May 8; 328(7448): 1110.
9. Warwickshire Observatory website – ONS population estimates. Web link (accessed on 3/10/13):  
<http://www.warwickshireobservatory.org/observatory/observatorywcc.nsf/05a17cfbd3bcf85d802572920033cf0f/bfb8b0a1d34f274c802572c00048108f?OpenDocument>
10. Deprivation data produced by the Department for Communities and Local Government. File located at web link (accessed on 3/10/13):  
<https://www.gov.uk/government/publications/english-indices-of-deprivation-2010>  
Ward based population weighted averages calculated from LSOA specific data by the London Health Observatory and North East Public Health Observatory.
11. Fahrmeir L, Lang S. Bayesian Inference for Generalized Additive Mixed Models Based on Markov Random Field Priors. *Applied Statistics (JRSS C)*. 2001;50:201-20.
12. Kandala N-B, Tigbe W, Manda S, Stranges S. Spatial Variation of Predictors of Hypertension in Sub-Saharan Africa: A Case Study of South-Africa. *American Journal of Hypertension* 2013. 10.1093/ajh/hps063.
13. Belitz C, Brezger A, Kneib T, Lang S. BayesX Software for Bayesian Inference in Structured Additive Regression Models Version 2.0.1, 2012. Accessed at:  
[http://www.stat.uni-muenchen.de/~bayesx/manual/methodology\\_manual.pdf](http://www.stat.uni-muenchen.de/~bayesx/manual/methodology_manual.pdf)
14. Taken from the Warwickshire Observatory Quality of Life in Warwickshire 2012/13 report. Weblink (accessed on 3/10/13):  
[http://maps.warwickshire.gov.uk/iareports/environmental\\_issues/](http://maps.warwickshire.gov.uk/iareports/environmental_issues/)

### Author's contributions

OB conceived the idea, analyzed the data, contributed to formulating the results and wrote the first draft.

N-B K analyzed the data, advised on statistical aspects, contributed to formulating the results, wrote the second draft. CJ analyzed the data. JL helped coordinate the project and co-wrote the final draft; AC coordinated the project, advised on all aspects and co-wrote the final draft.

## Figure legends

**Figure 1 :** Warwickshire map with 2010 air quality index (all components of air pollution combined) displayed by ward (left; Warwickshire map with number of heart failure hospital admissions per 1000 population between 2005 – 2013 displayed by ward(centre) and Warwickshire map with total heart failure deaths per 1000 population between 2007 – 2012 displayed by ward(right).

[FIGURE 1 ABOUT HERE]

**Figure 2:** Left: Unadjusted total residual spatial effects of morbidity risk associated with heart failure, at ward level in Warwickshire. Shown are the posterior means. Right: Corresponding posterior probabilities at 80% nominal level.

[FIGURE 2 ABOUT HERE]

*Red coloured – high risk*  
*Green coloured – low risk*

*Black coloured – significant positive spatial effect*  
*White coloured- significant negative spatial effect*  
*Grey coloured – no significant effect*

**Figure 3:** Left: Total residual spatial effects of morbidity risk associated with heart failure, at ward level in Warwickshire. Shown are the posterior means of the full model (IMD 2010, Over 50, and the 4 indicators of air pollution). Right: Corresponding posterior probabilities at 80% nominal level.

[FIGURE 3 ABOUT HERE]

*Red coloured – high risk*  
*Green coloured – low risk*

*Black coloured – significant positive spatial effect*  
*White coloured- significant negative spatial effect*  
*Grey coloured – no significant effect*

**Figure 4:** Left: Unadjusted total residual spatial effects of mortality risk associated with heart failure, at ward level in Warwickshire. Shown are the posterior means. Right: Corresponding posterior probabilities at 80% nominal level.

[FIGURE 4 ABOUT HERE]

*Red coloured – high risk*  
*Green coloured – low risk*

*Black coloured – significant positive spatial effect*  
*White coloured- significant negative spatial effect*  
*Grey coloured – no significant effect*

**Figure 5:** Left: Total residual spatial effects of mortality risk associated with heart failure, at ward level in Warwickshire. Shown are the posterior means of the full model (IMD 2010, Over 50, and the 4 indicators of air pollution). Right: Corresponding posterior probabilities at 80% nominal level.

[FIGURE 5 ABOUT HERE]

*Red coloured – high risk*  
*Green coloured – low risk*

*Black coloured – significant positive spatial effect*  
*White coloured- significant negative spatial effect*  
*Grey coloured – no significant effect*

**Figure 6 –** Warwickshire map displaying the 2010 levels of deprivation (expressed as Multiple Deprivation Scores) by LSOAs. Produced by the Warwickshire Observatory (left) and Warwickshire map displaying the 2008 midyear estimates of % of people over the age of 50 by SOA. Produced by the Warwickshire Observatory (right).

**Table 1: Posterior mean (PM) of fixed effects estimates of heart failure admission and mortality across air pollutions indicators (Warwickshire 2005-2013)**

| Variable                         | Heart failure admission<br>PM & 95%CI <sup>‡</sup> | Heart failure mortality<br>PM & 95%CI <sup>†</sup> |
|----------------------------------|----------------------------------------------------|----------------------------------------------------|
| Constant                         | 6.19 (3.84, 8.97)                                  | 4.13 (1.18, 7.43)                                  |
| Nitrogen dioxide indicator (No2) | 3.35 (1.89, 4.99)                                  | 4.30 (1.68, 7.37)                                  |
| Sulphur dioxide indicator (So2)) | 7.75 (-3.84, 17.99)                                | 11.02 (-1.21, 22.41)                               |
| Particulates indicator (Pm)      | -12.93 (-20.41, -6.54)                             | -14.69 (-23.46, -6.50)                             |
| Benzene indicator (Ben)          | [31.9:8.36, 55.85]                                 | 25.98 (-6.62, 54.22)                               |
| Over 50 years %                  | 0.70(-0.63, 1.98)                                  | 1.60, (0.47, 2.92)                                 |
| IMD 2010 score                   | 0.02 ( 0.01, 0.03)                                 | 0.00 (-0.01, 0.01)                                 |

<sup>‡</sup> Spatially adjusted posterior mean (PM) from Bayesian geo-additive regression models after controlling for fixed effect of all air pollutions indicators: Mono-nitrogen Oxide (NOx), sulphur dioxide (So2), particulate matter (Pm), benzene (Ben) and combined index and the county of residence (spatial effects). <sup>†</sup> Spatially adjusted posterior mean (PM) from Bayesian geo-additive regression models after controlling for fixed effect of all air pollutions indicators: Mono-nitrogen Oxide (NOx), sulphur dioxide (So2), particulate matter (Pm), benzene (Ben) and combined index and the county of residence (spatial effects).

1  
2  
3  
4  
5  
6  
7  
8  
9  
10  
11  
12  
13  
14  
15  
16  
17  
18  
19  
20  
21  
22  
23  
24  
25  
26  
27  
28  
29  
30  
31  
32  
33  
34  
35  
36  
37  
38  
39  
40  
41  
42  
43  
44  
45  
46  
47  
48  
49  
50  
51  
52  
53  
54  
55  
56  
57  
58  
59  
60

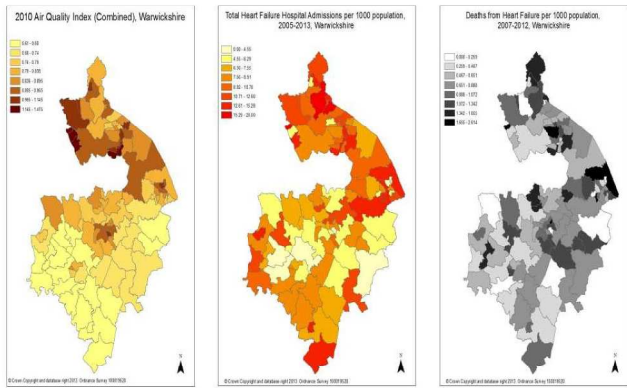

209x297mm (300 x 300 DPI)

1  
2  
3  
4  
5  
6  
7  
8  
9  
10  
11  
12  
13  
14  
15  
16  
17  
18  
19  
20  
21  
22  
23  
24  
25  
26  
27  
28  
29  
30  
31  
32  
33  
34  
35  
36  
37  
38  
39  
40  
41  
42  
43  
44  
45  
46  
47  
48  
49  
50  
51  
52  
53  
54  
55  
56  
57  
58  
59  
60

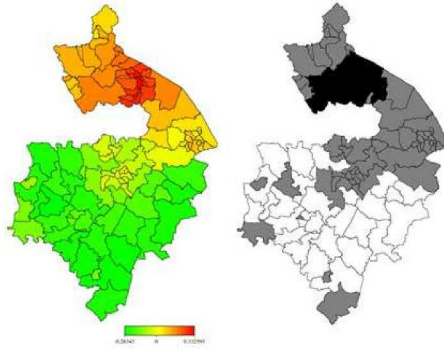

209x297mm (300 x 300 DPI)



1  
2  
3  
4  
5  
6  
7  
8  
9  
10  
11  
12  
13  
14  
15  
16  
17  
18  
19  
20  
21  
22  
23  
24  
25  
26  
27  
28  
29  
30  
31  
32  
33  
34  
35  
36  
37  
38  
39  
40  
41  
42  
43  
44  
45  
46  
47  
48  
49  
50  
51  
52  
53  
54  
55  
56  
57  
58  
59  
60

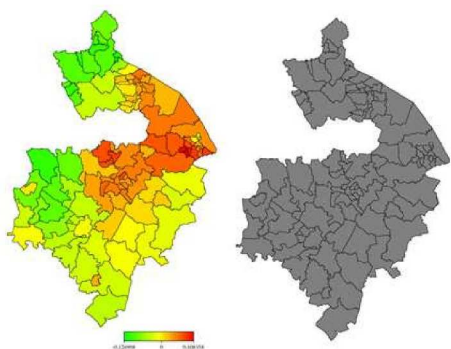

209x297mm (300 x 300 DPI)

1  
2  
3  
4  
5  
6  
7  
8  
9  
10  
11  
12  
13  
14  
15  
16  
17  
18  
19  
20  
21  
22  
23  
24  
25  
26  
27  
28  
29  
30  
31  
32  
33  
34  
35  
36  
37  
38  
39  
40  
41  
42  
43  
44  
45  
46  
47  
48  
49  
50  
51  
52  
53  
54  
55  
56  
57  
58  
59  
60

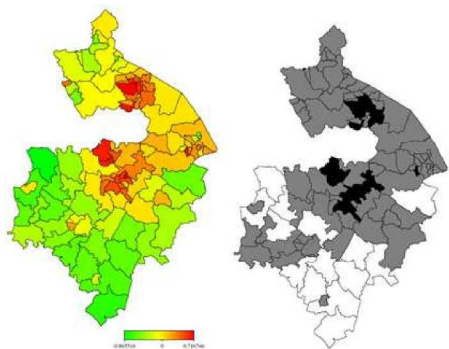

209x297mm (300 x 300 DPI)

1  
2  
3  
4  
5  
6  
7  
8  
9  
10  
11  
12  
13  
14  
15  
16  
17  
18  
19  
20  
21  
22  
23  
24  
25  
26  
27  
28  
29  
30  
31  
32  
33  
34  
35  
36  
37  
38  
39  
40  
41  
42  
43  
44  
45  
46  
47  
48  
49  
50  
51  
52  
53  
54  
55  
56  
57  
58  
59  
60

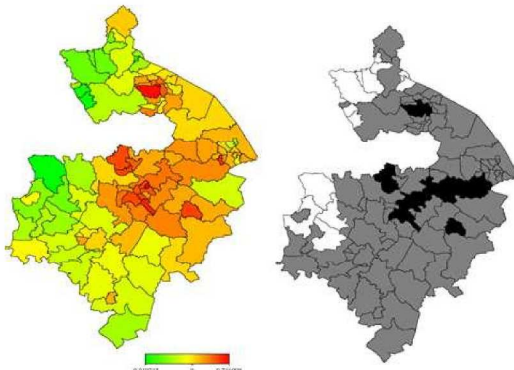

209x297mm (300 x 300 DPI)

1  
2  
3  
4  
5  
6  
7  
8  
9  
10  
11  
12  
13  
14  
15  
16  
17  
18  
19  
20  
21  
22  
23  
24  
25  
26  
27  
28  
29  
30  
31  
32  
33  
34  
35  
36  
37  
38  
39  
40  
41  
42  
43  
44  
45  
46  
47  
48  
49  
50  
51  
52  
53  
54  
55  
56  
57  
58  
59  
60

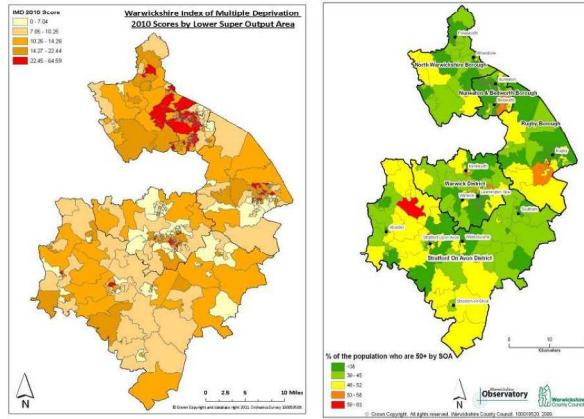

209x297mm (300 x 300 DPI)

STROBE 2007 (v4) Statement—Checklist of items that should be included in reports of *cross-sectional studies*

| Section/Topic             | Item # | Recommendation                                                                                                                                                                       | Reported on page # |
|---------------------------|--------|--------------------------------------------------------------------------------------------------------------------------------------------------------------------------------------|--------------------|
| Title and abstract        | 1      | (a) Indicate the study’s design with a commonly used term in the title or the abstract                                                                                               | 2                  |
|                           |        | (b) Provide in the abstract an informative and balanced summary of what was done and what was found                                                                                  | 2                  |
| <b>Introduction</b>       |        |                                                                                                                                                                                      |                    |
| Background/rationale      | 2      | Explain the scientific background and rationale for the investigation being reported                                                                                                 | 4                  |
| Objectives                | 3      | State specific objectives, including any prespecified hypotheses                                                                                                                     | 4,5                |
| <b>Methods</b>            |        |                                                                                                                                                                                      |                    |
| Study design              | 4      | Present key elements of study design early in the paper                                                                                                                              | 4, 5               |
| Setting                   | 5      | Describe the setting, locations, and relevant dates, including periods of recruitment, exposure, follow-up, and data collection                                                      | 5,6                |
| Participants              | 6      | (a) Give the eligibility criteria, and the sources and methods of selection of participants                                                                                          | 5,6,               |
| Variables                 | 7      | Clearly define all outcomes, exposures, predictors, potential confounders, and effect modifiers. Give diagnostic criteria, if applicable                                             | 5-7                |
| Data sources/ measurement | 8*     | For each variable of interest, give sources of data and details of methods of assessment (measurement). Describe comparability of assessment methods if there is more than one group | 5-6                |
| Bias                      | 9      | Describe any efforts to address potential sources of bias                                                                                                                            | 7-8,12             |
| Study size                | 10     | Explain how the study size was arrived at                                                                                                                                            | 5                  |
| Quantitative variables    | 11     | Explain how quantitative variables were handled in the analyses. If applicable, describe which groupings were chosen and why                                                         | 7-8                |
| Statistical methods       | 12     | (a) Describe all statistical methods, including those used to control for confounding                                                                                                | 7,8                |
|                           |        | (b) Describe any methods used to examine subgroups and interactions                                                                                                                  | NA                 |
|                           |        | (c) Explain how missing data were addressed                                                                                                                                          | NA                 |
|                           |        | (d) If applicable, describe analytical methods taking account of sampling strategy                                                                                                   | NA                 |
|                           |        | (e) Describe any sensitivity analyses                                                                                                                                                | NA                 |
| <b>Results</b>            |        |                                                                                                                                                                                      |                    |

1  
2  
3  
4  
5  
6  
7  
8  
9  
10  
11  
12  
13  
14  
15  
16  
17  
18  
19  
20  
21  
22  
23  
24  
25  
26  
27  
28  
29  
30  
31  
32  
33  
34  
35  
36  
37  
38  
39  
40  
41  
42  
43  
44  
45  
46  
47  
48  
49

|                          |     |                                                                                                                                                                                                              |        |
|--------------------------|-----|--------------------------------------------------------------------------------------------------------------------------------------------------------------------------------------------------------------|--------|
| Participants             | 13* | (a) Report numbers of individuals at each stage of study—eg numbers potentially eligible, examined for eligibility, confirmed eligible, included in the study, completing follow-up, and analysed            | 2, 5,6 |
|                          |     | (b) Give reasons for non-participation at each stage                                                                                                                                                         | NA     |
|                          |     | (c) Consider use of a flow diagram                                                                                                                                                                           | NA     |
| Descriptive data         | 14* | (a) Give characteristics of study participants (eg demographic, clinical, social) and information on exposures and potential confounders                                                                     | 6      |
|                          |     | (b) Indicate number of participants with missing data for each variable of interest                                                                                                                          | NA     |
| Outcome data             | 15* | Report numbers of outcome events or summary measures                                                                                                                                                         | 10-11  |
| Main results             | 16  | (a) Give unadjusted estimates and, if applicable, confounder-adjusted estimates and their precision (eg, 95% confidence interval). Make clear which confounders were adjusted for and why they were included | 8      |
|                          |     | (b) Report category boundaries when continuous variables were categorized                                                                                                                                    | NA     |
|                          |     | (c) If relevant, consider translating estimates of relative risk into absolute risk for a meaningful time period                                                                                             | NA     |
| Other analyses           | 17  | Report other analyses done—eg analyses of subgroups and interactions, and sensitivity analyses                                                                                                               | NA     |
| <b>Discussion</b>        |     |                                                                                                                                                                                                              |        |
| Key results              | 18  | Summarise key results with reference to study objectives                                                                                                                                                     | 8-10   |
| Limitations              | 19  | Discuss limitations of the study, taking into account sources of potential bias or imprecision. Discuss both direction and magnitude of any potential bias                                                   | 11, 15 |
| Interpretation           | 20  | Give a cautious overall interpretation of results considering objectives, limitations, multiplicity of analyses, results from similar studies, and other relevant evidence                                   | 11-15  |
| Generalisability         | 21  | Discuss the generalisability (external validity) of the study results                                                                                                                                        | 11-15  |
| <b>Other information</b> |     |                                                                                                                                                                                                              |        |
| Funding                  | 22  | Give the source of funding and the role of the funders for the present study and, if applicable, for the original study on which the present article is based                                                | NA     |

\*Give information separately for cases and controls in case-control studies and, if applicable, for exposed and unexposed groups in cohort and cross-sectional studies.

**Note:** An Explanation and Elaboration article discusses each checklist item and gives methodological background and published examples of transparent reporting. The STROBE checklist is best used in conjunction with this article (freely available on the Web sites of PLoS Medicine at <http://www.plosmedicine.org/>, Annals of Internal Medicine at <http://www.annals.org/>, and Epidemiology at <http://www.epidem.com/>). Information on the STROBE Initiative is available at [www.strobe-statement.org](http://www.strobe-statement.org).
